# Supplementary material for: Root-Associated Antagonistic Pseudomonas spp. Contribute to Soil Suppressiveness against Banana Fusarium Wilt Disease of Banana
Source: PubMed Central journal article supplement (PMC10100972; doi:10.1128/spectrum.03525-22), 2023-02-14
Supplement: spectrum.03525-22-s0001.pdf [file spectrum.03525-22-s0001.pdf]

# Supporting Online Material for

## **Root-associated antagonistic *Pseudomonas* spp. contribute to soil suppressiveness against banana *Fusarium* wilt disease of banana**

Nana Lv<sup>1</sup>, Chengyuan Tao<sup>1</sup>, Yanna Ou<sup>1</sup>, Jiabao Wang<sup>1,2</sup>, Xuhui Deng<sup>1</sup>, Hongjun Liu<sup>1</sup>,  
Zongzhuan Shen<sup>1,2</sup>✉, Rong Li<sup>1,2</sup>, Qirong Shen<sup>1,2</sup>

### **Author affiliation**

<sup>1</sup> Jiangsu Provincial Key Lab of Solid Organic Waste Utilization, Jiangsu Collaborative Innovation Center of Solid Organic Wastes, Educational Ministry Engineering Center of Resource-saving fertilizers, The Key Laboratory of Plant Immunity, Joint International Research Laboratory of Soil Health, Nanjing Agricultural University, Nanjing, 210095, Jiangsu, People's Republic of China

<sup>2</sup> The Sanya Institute of the Nanjing Agricultural University, Sanya, Hainan Province, China

✉ Corresponding author: Zongzhuan Shen, College of Resources and Environmental Sciences, Nanjing Agricultural University, 210095, Nanjing, China. E-mail: shenzongz@njau.edu.cn.  
Tel: (86) 025 84395521. Fax: (86) 02584395535.

## Supplemental table

**Table S1.** Basic soil physicochemical properties from these paired banana orchards

| Soil type                | PH   | Total Carbon<br>(g/kg) | Total Nitrogen<br>(g/kg) | Available Phosphorus<br>(mg/kg) | Available Potassium<br>(mg/kg) |
|--------------------------|------|------------------------|--------------------------|---------------------------------|--------------------------------|
| Disease-suppressive soil | 7.02 | 14.76                  | 1.68                     | 226                             | 468                            |
| Disease-conducive soil   | 5.22 | 14.15                  | 1.47                     | 157                             | 343                            |

## Supplemental figures

**Fig. S1** Alpha diversity Chao1 index (a) and Shannon index (b) of bacterial communities across all samples.

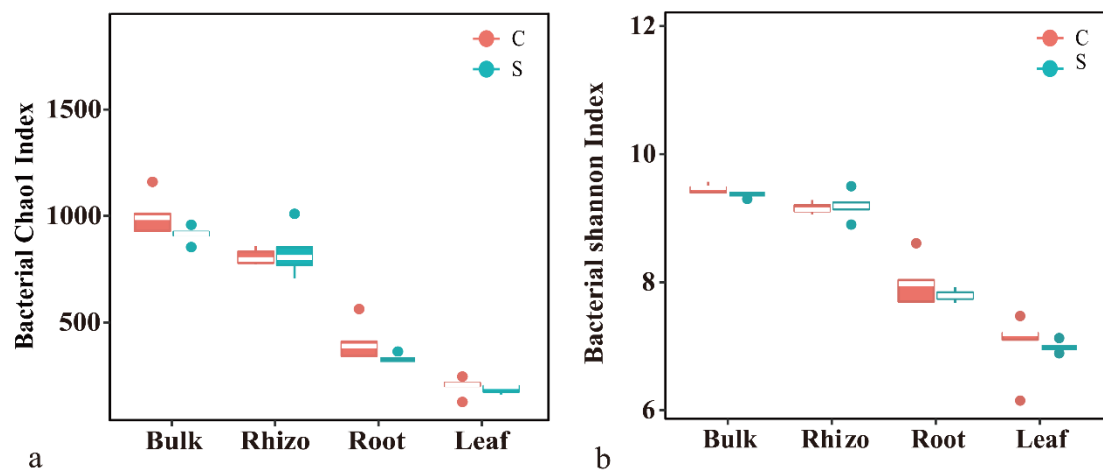

**Fig. S2** Banana seedlings dry weight of the pot experiment under pathogen invasion with the *Pseudomonas* inoculation (mean  $\pm$  SE). Different letters above the bars indicate significant differences at the 0.05 probability level according to Duncan's multiple range test (n=6). CK: control (treatment with *Foc* TR4 but without *Pseudomonas*).

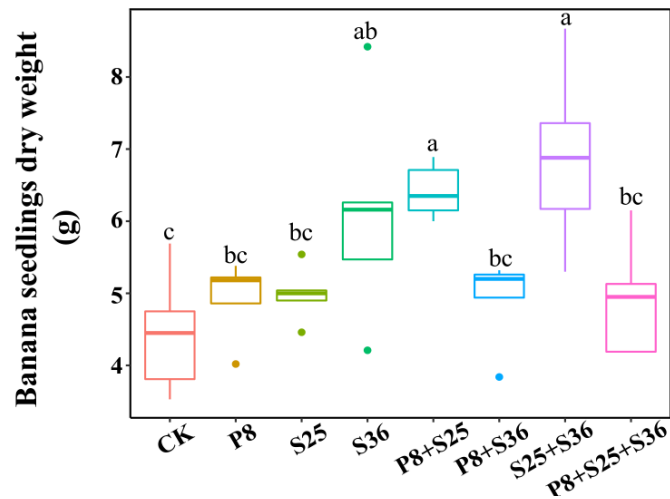

**Fig. S3** Functional gene abundance from isolates inoculation experiment. Abundance of non-ribosomal peptide synthetase NRPS(a) and type I PKS genes (b) from rhizosphere under pathogen invasion with the *Pseudomonas* inoculation (mean  $\pm$  SE). Different letters above the bars indicate significant differences at the 0.05 probability level according to Duncan's multiple range test (n=6). CK: control (treatment with *Foc* TR4 but without *Pseudomonas*).

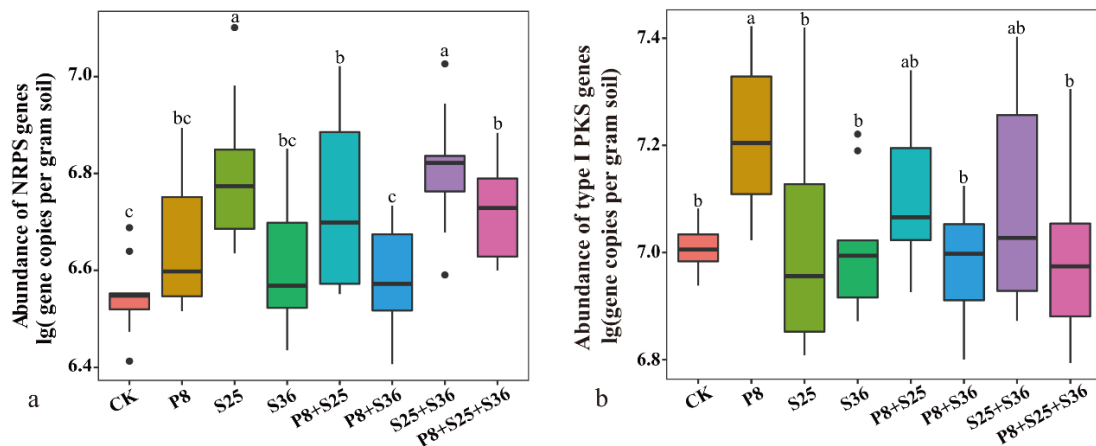

**Fig. S4** *Pseudomonas* OTUs with relative abundance greater than 0.1% from banana rhizosphere soils from different *Pseudomonas* inoculation treatments in pot experiment (mean  $\pm$  SE). Different letters above the bars indicate significant differences at the 0.05 probability level according to Duncan's multiple range test (n=6). CK: control (treatment with *Foc* TR4 but without *Pseudomonas*).

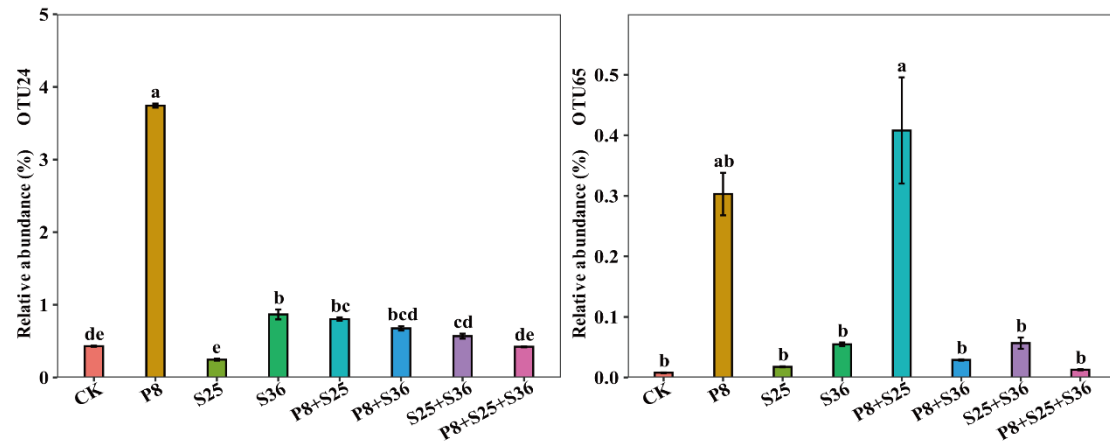

## Supplemental Sequences

### Sequences of key OTUs

>otu160

```
GTGCCAGCAGCCGCGGTAATACAGAGGGTGCAAGCGTTAATCGGAATTACTGGG
CGTAAAGCGCGCGTAGGTTGGTTCGTAAAGTTGGATGTGAAAGCCCCGGGCTCAA
CCTGGGAACTGCATCCAAAAGTGGCGAGCTAGAGTACGGTAGAGGGTGGTGGAA
TTTCCTGTGTAGCGGTGAAATGCGTAGATATAGGAAGGAACACCAGTGGCGAAG
GCGACCACCTGGACTGATACTGACACTGAGGTGCGAAAGCGTGGGGAGCAAAC
AGGATTAGAAACCCTGGTAGTCC
```

>otu27

```
GTGCCAGCAGCCGCGGTAATACAGAGGGTGCAAGCGTTAATCGGAATTACTGGG
CGTAAAGCGCGCGTAGGTTGGTTCGTAAAGTTGGATGTGAAAGCCCCGGGCTCAA
CCTGGGAACTGCATCCAAAAGTGGCGAGCTAGAGTACGGTAGAGGGTGGTGGAA
TTTCCTGTGTAGCGGTGAAATGCGTAGATATAGGAAGGAACACCAGTGGCGAAG
GCGACCACCTGGACTGATACTGACACTGAGGTGCGAAAGCGTGGGGAGCAAAC
AGGATTAGAAACCCTAGTAGTCC
```

### Sequences of isolated strains

>P8

AAGTCGAGCGGATGAGGAGAGCTTGCTCTCTGATTTAGCGGCGGACGGGTGAGT  
AATGCCTAGGAATCTGCCTGGTAGTGGGGGATAACGTCCGGAAACGGGGCGCTAAT  
ACCGCATACGTCCTACGGGAGAAAGCAGGGGACCTTCGGGCCTTGCGCTATCAG  
ATGAGCCTAGGTCGGATTAGCTAGTTGGTGAGGTAATGGCTACCAAGGCGACGA  
TCCGTA ACTGGTCTGAGAGGATGATCAGTCACACTGGA ACTGAGACACGGTCCA  
GACTCCTACGGGAGGCAGCAGTGGGGAATATTGGACAATGGGCGAAAGCCTGAT  
CCAGCCATGCCGCGTGTGTGAAGAAGGTCTTCGGATTGTAAAGCACTTTAAGTTG  
GGAGGAAGGGCAGTAAGTTAATACCTTGCTGTTTTGACGTTACCGACAGAATAAG  
CACCGGCTAACTTCGTGCCAGCAGCCGCGTAATACGAAGGGTGCAAGCGTTAA  
TCGGAATTACTGGGCGTAAAGCGCGCGTAGGTGGTTCGTTAAGTTGGATGTGAAA  
GCCCCGGGCTCAACCTGGGAACTGCATCCAAA ACTGGCGAGCTAGAGTACGGTA  
GAGGGTGGTGGAAATTTCTGTGTAGCGGTGAAATGCGTAGATATAGGAAGGAAC  
ACCAGTGGCGAAGGGCACCACCTGGACTGATACTGACACTGAGGTGCGAAAGC  
GTGGGAGCAAACAGGATTAGATACCCTGGTAGTCCACGCCGTAAACGATGTCA  
ACTAGCCGTTGGGTACCTTGAGTACTTAGTGGCGCAGCTAACGCATTAAGTTGAC  
CGCCTGGGGAGTACGGCCGCAAGGTTAAACTCAAATGAATTGACGGGGGCCCG  
CACAAGCGGTGGAGCATGTGGTTTAATTCGAAGCAACGCGAAGAACCTTACCTG  
GCCTTGACATGCTGAGAACTTTCCAGAGATGGATTGGTGCCTTCGGGAACTCAGA  
CACAGGTGCTGCATGGCTGTCGTCAGCTCGTGTGCTGAGATGTTGGGTAAAGTCC  
CGTAACGAGCGCAACCCTTGTCTTAGTTACCAGCACGTTATGGTGGGCACTCTA  
AGGAGACTGCCGGTGACAAACCGGAGGAAGGTGGGGATGACGTCAAGTCATCAT  
GGCCCTTACGGCCAGGGCTACACACGTGCTACAATGGTCGGTACAAAGGGTTGC  
CAAGCCGCGAGGTGGAGCTAATCCCATAAAACCGATCGTAGTCCGGATCGCAGTC  
TGCAACTCGACTGCGTGAAGTCGGAATCGTAGTAATCGTGAATCAGAATGTCAC  
GGTGAATACGTTCCCGGGCCTTGACACACCGCCCGTCACACCATGGGAGTGGGT  
TGCTCCAGAAGTAGCTAGTCTAACCTTCGGGG

>S25

ACCGTCCTCCCGAAGGTTAGACTAGCTACTTCTGGTGCAACCCACTCCCATGGTG  
TGACGGGCGGTGTGTACAAGGCCCGGGAACGTATTCACCGCGACATTCTGATTCCG  
CGATTACTAGCGATTCCGACTTCACGCAGTCGAGTTGCAGACTGCGATCCGGACT  
ACGATCGGTTTTGTGAGATTAGCTCCACCTCGCGGCTTGGCAACCCTCTGTACCG  
ACCATTGTAGCACGTGTGTAGCCCAGGCCGTAAGGGCCATGATGACTTGACGTCA  
TCCCCACCTTCTCCGGTTTGTACCCGGCAGTCTCCTTAGAGTGCCCACCATAAC  
GTGCTGGTAACTAAGGACAAGGGTTGCGCTCGTTACGGGACTTAACCCAACATCT  
CACGACACGAGCTGACGACAGCCATGCAGCACCTGTGTCAGAGTTCCCGAAGGC  
ACCAATCCATCTCTGGAAAGTTCTCTGCATGTCAAGGCCTGGTAAGGTTCTTCGC  
GTTGCTTCGAATTAACCATGCTCCACCGCTTGTGCGGGCCCCCGTCAATTCAT  
TTGAGTTTTAACCTTGCGGCCGTA TCCCCAGGCGGTCAACTTAATGCGTTAGCT  
GCGCCACTAAAATCTCAAGGATTCCAACGGCTAGTTGACATCGTTTACGGCGTGG  
ACTACCAGGGTATCTAATCCTGTTTGCTCCCCACGCTTTCGCACCTCAGTGTCACT  
ATCAGTCCAGGTGGTCCGCTTCGCCACTGGTGTTCCTTCTATATCTACGCATTC  
ACCGCTACACAGGAAATCCACCACCCTCTACCATACTCTAGCTCGCCAGTTTTG  
GATGCAGTTCCAGGTTGAGCCCGGGGCTTTCACATCCA ACTTAACGAACCACCT  
ACGCGCGCTTACGCCAGTAATTCGATTAACGCTTGCACCCTCTGTATTACCGC

GGCTGCTGGCACAGAGTTAGCCGGTGCTTATTCTGTCGGTAAACGTCAAAAACAGCA  
AGGTATTA ACTTACTGCCCTTCCTCCCAACTTAAAGTGCTTTACAATCCGAAGACC  
TTCTTCACACACGCGGCATGGCTGGATCAGGCTTTCGCCCATTGTCCAATATCCC  
CACTGCTGCCTCCCGTAGGAGTCTGGACCGTGTCTCAGTTCCAGTGTGACTGATC  
ATCCTCTCAGACCAGTTACGGATCGTCGCCTTGGTGAGCCATTACCTCACCAACT  
AGCTAATCCGACCTAGGCTCATCTGATAGCGCAAGGCCCGAAGGTCCCCTGCTTT  
CTCCCGTAGGACGTATGCGGTATTAGCGTTCCTTTCGAAACGTTGTCCCCACTAC  
CAGGCAGATTCCTAGGCATTACTCACCCGTCCGCCGCTGAATCAAGGAGCAAGCT  
CCCATCATCCGCTCGACTGTG

>S36

CATGCAAGTCGAGCGGATGACGGGAGCTTGCTCCTTGATTACAGCGGCGGACGGG  
TGAGTAATGCCTAGGAATCTGCCTGGTAGTGGGGGACAACGTTTCGAAAGGAAC  
GCTAATACCGCATAACGTCCTACGGGAGAAAGCAGGGGACCTTCGGGCCTTGCGCT  
ATCAGATGAGCCTAGGTCGGATTAGCTAGTTGGTGGGGTAATGGCTACCAAGGC  
GACGATCCGTA ACTGGTCTGAGAGGATGATCAGTCACACTGGA ACTGAGACACG  
GTCCAGACTCCTACGGGAGGCAGCAGTGGGGAATATTGGACAATGGGCGAAAGC  
CTGATCCAGCCATGCCGCGTGTGTGAAGAAGGTCTTCGGATTGTAAAGCACTTTA  
AGTTGGGAGGAAGGGCAGTAAGTTAATACCTTGCTGTTTTGACGTTACCGACAGA  
ATAAGCACCGGCTAACTCTGTGCCAGCAGCCGCGTAATACAGAGGGTGCAAGC  
GTTAATCGGAATTACTGGGCGTAAAGCGCGCGTAGGTGGTTCGTTAAGTTGGATG  
TGAAAGCCCCGGGCTCAACCTGGGAACTGCATCCAAA ACTGGCGAGCTAGAGTA  
CGGTAGAGGGTGGTGGAATTCCTGTGTAGCGGTGAAATGCGTAGATATAGGAAG  
GAACACCAGTGGCGAAGGCGACCACCTGGACTGATACTGACACTGAGGTGCGA  
AAGCGTGGGGAGCAAACAGGATTAGATACCCTGGTAGTCCACGCCGTAAACGAT  
GTCAACTAGCCGTTGGAATCCTTGAGATTTTAGTGGCGCAGCTAACGCATTAAGT  
TGACCGCCTGGGGAGTACGGCCGCAAGGTTAAA ACTCAAATGAATTGACGGGGG  
CCCGCACAAAGCGGTGGAGCATGTGGTTTAATTGGAAGCAACGCGAAGAACCTTA  
CCAGGCCTTGACATGCAGAGA ACTTTCCAGAGATGGATTGGTGCCCTTCGGGAACT  
CTGACACAGGTGCTGCATGGCTGTCTGTCAGCTCGTGTCTGAGATGTTGGGTAA  
GTCCCGTAACGAGCGCAACCCTTGTCCTTAGTTACCAGCACGTTATGGTGGGCAC  
TCTAAGGAGACTGCCGGTGACAAACCGGAGGAAGGTGGGGATGACGTCAAGTC  
ATCATGGCCCTTACGGCCTGGGCTACACACGTGCTACAATGGTCGGTACAGAGGG  
TTGCCAAGCCGCGAGGTGGAGCTAATCTCACAAAACCGATCGTAGTCCGGATCGC  
AGTCTGCAACTCGACTGCGTGAAGTCGGAATCGCTAGTAATCGCGAATCAGAATG  
TCGCGGTGAATACGTTCCCGGGCCTTGACACACCGCCGTCACACCATGGGAGT  
GGGTTGCACCAGAAGTAGCTAGTCTAACCTTCGGGAGGACGGT

>S321

CACATGCAAGTCGAGCGGATGACGGGAGCTTGCTCCTTGATTACAGCGGCGGACG  
GGTGAGTAATGCCTAGGAATCTGCCTGGTAGTGGGGGACAACGTTTCGAAAGGA  
ACGCTAATACCGCATAACGTCCTACGGGAGAAAGCAGGGGACCTTCGGGCCTTGC  
GCTATCAGATGAGCCTAGGTCGGATTAGCTAGTTGGTGAGGTAATGGCTACCAA  
GGCGACGATCCGTA ACTGGTCTGAGAGGATGATCAGTCACACTGGA ACTGAGAC  
ACGGTCCAGACTCCTACGGGAGGCAGCAGTGGGGAATATTGGACAATGGGCGAA  
AGCCTGATCCAGCCATGCCGCGTGTGTGAAGAAGGTCTTCGGATTGTAAAGCACT

TTAAGTTGGGAGGAAGGGCAGTACGTTAATACCGTGCTGTTTTGACGTTACCGAC  
AGAATAAGCACCGGCTAACTCTGTGCCAGCAGCCGCGTAATACAGAGGGTGCA  
AGCGTTAATCGGAATTACTGGGCGTAAAGCGCGCGTAGGTGGTTCGTTAAGTTGG  
ATGTGAAAGCCCCGGGCTCAACCTGGGAACTGCATCCAAAACCTGGCGAGCTAGA  
GTATGGTAGAGGGTGGTGGAAATTCCTGTGTAGCGGTGAAATGCGTAGATATAGG  
AAGGAACACCAGTGGCGAAGGCGACCACCTGGACTGATACTGACACTGAGGTG  
CGAAAGCGTGGGGAGCAAACAGGATTAGATACCCTGGTAGTCCACGCCGTAAAC  
GATGTCAACTAGCCGTTGGAATCCTTGAGATTTTAGTGCGCAGCTAACGCATTA  
AGTTGACCGCCTGGGGAGTACGGCCGCAAGGTTAAAACCTCAAATGAATTGACGG  
GGCCCCGCACAAGCGGTGGAGCATGTGGTTTAATTGGAAGCAACGCGAAGAACC  
TTACCAGGCCTTGACATGCAGAGAACTTTCCAGAGATGGATTGGTGCCTTCGGGA  
ACTCTGACACAGGTGCTGCATGGCTGTCGTCAGCTCGTGTGCTGAGATGTTGGGT  
TAAGTCCCGTAACGAGCGCAACCCTTGTCCTTAGTTACCAGCACGTTATGGTGGG  
CACTCTAAGGAGACTGCCGGTGACAAACCGGAGGAAGGTGGGGATGACGTCAA  
GTCATCATGGCCCTTACGGCCTGGGCTACACACGTGCTACAATGGTCGGTACAGA  
GGTTGCCAAGCCGCGAGGTGGAGCTAATCTCACAAAACCGATCGTAGTCCGGA  
TCGCAGTCTGCAACTCGACTGCGTGAAGTCGGAATCGCTAGTAATCGCGAATCAG  
AATGTCGCGGTGAATACGTTCCCGGGCCTTGACACACCGCCCGTCACACCATGG  
GAGTGGGTTGCACCAGAAGTAGCTAGTCTAACCTTCGGGAGGACGGT

>S332

CATGCAAGTCGAGCGGATGACGGGAGCTTGCTCCTTGATTACAGCGGCGGACGGG  
TGAGTAATGCCTAGGAATCTGCCTGGTAGTGGGGACAACGTTTCGAAAGGAAC  
GCTAATACCGCATAACGTCCTACGGGAGAAAGCAGGGGACCTTCGGGCCTTGCGCT  
ATCAGATGAGCCTAGGTTCGATTAGCTAGTTGGTGAGGTAATGGCTACCAAGGC  
GACGATCCGTAACCTGGTCTGAGAGGATGATCAGTCACACTGGAAGTACGACACG  
GTCCAGACTCCTACGGGAGGCAGCAGTGGGGAATATTGGACAATGGGCGAAAGC  
CTGATCCAGCCATGCCGCGTGTGTGAAGAAGGTCTTCGGATTGTAAAGCACTTTA  
AGTTGGGAGGAAGGGCAGTACGTTAATACCGTGCTGTTTTGACGTTACCGACAG  
AATAAGCACCGGCTAACTCTGTGCCAGCAGCCGCGGTAATACAGAGGGTGCAAG  
CGTTAATCGGAATTACTGGGCGTAAAGCGCGCGTAGGTGGTTCGTTAAGTTGGAT  
GTGAAAGCCCCGGGCTCAACCTGGGAACTGCATCCAAAACCTGGCGAGCTAGAGT  
ATGGTAGAGGGTGGTGGAAATTCCTGTGTAGCGGTGAAATGCGTAGATATAGGAA  
GGAACACCAGTGGCGAAGGCGACCACCTGGACTGATACTGACACTGAGGTGCG  
AAAGCGTGGGGAGCAAACAGGATTAGATACCCTGGTAGTCCACGCCGTAAACGA  
TGTCAACTAGCCGTTGGAATCCTTGAGATTTTAGTGCGCAGCTAACGCATTAAG  
TTGACCGCCTGGGGAGTACGGCCGCAAGGTTAAAACCTCAAATGAATTGACGGGG  
GCCCCGCACAAGCGGTGGAGCATGTGGTTTAATTGGAAGCAACGCGAAGAACCTT  
ACCAGGCCTTGACATGCAGAGAACTTTCCAGAGATGGATTGGTGCCTTCGGGAA  
CTCTGACACAGGTGCTGCATGGCTGTCGTCAGCTCGTGTGCTGAGATGTTGGGTT  
AAGTCCCGTAACGAGCGCAACCCTTGTCCTTAGTTACCAGCACGTTATGGTGGGC  
ACTCTAAGGAGACTGCCGGTGACAAACCGGAGGAAGGTGGGGATGACGTCAAG  
TCATCATGGCCCTTACGGCCTGGGCTACACACGTGCTACAATGGTCGGTACAGAG  
GGTTGCCAAGCCGCGAGGTGGAGCTAATCTCACAAAACCGATCGTAGTCCGGAT  
CGCAGTCTGCAACTCGACTGCGTGAAGTCGGAATCGCTAGTAATCGCGAATCAGA

ATGTCGCGGTGAATACGTTCCCGGGCCTTGTACACACCGCCCGTCACACCATGGG  
AGTGGGTTGCACCAGAAGTAGCTAGTCTAACCTTCGGGAGGAC

>S334

ACATGCAAGTCGAGCGGATGACGGGAGCTTGCTCCTTGATTCAGCGGCGGACGG  
GTGAGTAATGCCTAGGAATCTGCCTGGTAGTGGGGGACAACGTTTCGAAAGGAA  
CGCTAATACCGCATACTGCTACGGGAGAAAGCAGGGGACCTTCGGGCCTTGCG  
CTATCAGATGAGCCTAGGTCGGATTAGCTAGTTGGTGAGGTAATGGCTCACCAAG  
GCGACGATCCGTAACCTGGTCTGAGAGGATGATCAGTCACACTGGAAGTGAAGACA  
CGGTCCAGACTCCTACGGGAGGCAGCAGTGGGGAATATTGGACAATGGGCGAAA  
GCCTGATCCAGCCATGCCGCGTGTGTGAAGAAGGTCTTCGGATTGTAAAGCACTT  
TAAGTTGGGAGGAAGGGCAGTACGTTAATACCGTGCTGTTTTGACGTTACCGACA  
GAATAAGCACCGGCTAACTCTGTGCCAGCAGCCGCGGTAATACAGAGGGTGCAA  
GCGTTAATCGGAATTACTGGGCGTAAAGCGCGCGTAGGTGGTTCGTTAAGTTGGA  
TGTGAAAGCCCCGGGCTCAACCTGGGAACTGCATCCAAAAGTGGCGAGCTAGAG  
TATGGTAGAGGGTGGTGGAAATTCCTGTGTAGCGGTGAAATGCGTAGATATAGGA  
AGGAACACCAGTGGCGAAGGCGACCACCTGGACTGATACTGACTGAGGTGC  
GAAAGCGTGGGAGCAAACAGGATTAGATACCCTGGTAGTCCACGCCGTAACG  
ATGTCAACTAGCCGTTGGAATCCTTGAGATTTTGTAGTGGCGCAGCTAACGCATTAA  
GTTGACCGCCTGGGGAGTACGGCCGCAAGGTAAAAGTCAAATGAATTGACGGG  
GGCCCGCACAAAGCGGTGGAGCATGTGGTTTAAATTCGAAGCAACGCGAAGAACCT  
TACCAGGCCTTGACATGCAGAGAACTTTCCAGAGATGGATTGGTGCCTTCGGGAA  
CTCTGACACAGGTGCTGCATGGCTGTCGTCAGCTCGTGTGAGATGTTGGGTT  
AAGTCCCCTAACGAGCGCAACCCTTGTCCTTAGTTACCAGCACGTTATGGTGGGC  
ACTCTAAGGAGACTGCCGGTGACAAACCGGAGGAAGGTGGGGATGACGTCAAG  
TCATCATGGCCCTTACGGCCTGGGCTACACACGTGCTACAATGGTCGGTACAGAG  
GGTTGCCAAGCCGCGAGGTGGAGCTAATCTCACAAAACCGATCGTAGTCCGGAT  
CGAGTCTGCAACTCGACTGCGTGAAGTCGGAATCGCTAGTAATCGCGAATCAGA  
ATGTCGCGGTGAATACGTTCCCGGGCCTTGTACACACCGCCCGTCACACCATGGG  
AGTGGGTTGCACCAGAAGTAGCTAGTCTAACCTTCGGGAGGACGGT

>S336

TGCAAGTCGAGCGGATGACGGGAGCTTGCTCCTTGATTCAGCGGCGGACGGGTG  
AGTAATGCCTAGGAATCTGCCTGGTAGTGGGGGACAACGTTTCGAAAGGAACGC  
TAATACCGCATACTGCTACGGGAGAAAGCAGGGGACCTTCGGGCCTTGCGCTAT  
CAGATGAGCCTAGGTCGGATTAGCTAGTTGGTGAGGTAATGGCTCACCAAGGCGA  
CGATCCGTAACCTGGTCTGAGAGGATGATCAGTCACACTGGAAGTGAAGACACGGT  
CCAGACTCCTACGGGAGGCAGCAGTGGGGAATATTGGACAATGGGCGAAAGCCT  
GATCCAGCCATGCCGCGTGTGTGAAGAAGGTCTTCGGATTGTAAAGCACTTTAAG  
TTGGGAGGAAGGGCAGTACGTTAATACCGTGCTGTTTTGACGTTACCGACAGAAT  
AAGCACCGGCTAACTCTGTGCCAGCAGCCGCGGTAATACAGAGGGTGCAAGCGT  
TAATCGGAATTACTGGGCGTAAAGCGCGCGTAGGTGGTTCGTTAAGTTGGATGTG  
AAAGCCCCGGGCTCAACCTGGGAACTGCATCCAAAAGTGGCGAGCTAGAGTATG  
GTAGAGGGTGGTGGAAATTCCTGTGTAGCGGTGAAATGCGTAGATATAGGAAGGA  
ACACCAGTGGCGAAGGCGACCACCTGGACTGATACTGACTGAGGTGCGAAA  
GCGTGGGGAGCAAACAGGATTAGATACCCTGGTAGTCCACGCCGTAACGATGT



CAACTAGCCGTTGGAATCCTTGAGATTTTAGTGGCGCAGCTAACGCATTAAGTTG  
ACCGCCTGGGGAGTACGGCCGCAAGGTAAAACTCAAATGAATTGACGGGGGCC  
CGACAAGCGGTGGAGCATGTGGTTAATTCGAAGCAACGCGAAGAACCTTACC  
AGGCCTTGACATGCAGAGAACTTTCCAGAGATGGATTGGTGCCTTCGGGAACTCT  
GACACAGGTGCTGCATGGCTGTCGTCAGCTCGTGTCTGTGAGATGTTGGGTAAAGT  
CCCGTAACGAGCGCAACCCTTGTCCTTAGTTACCAGCACGTTATGGTGGGCACTC  
TAAGGAGACTGCCGGTGACAAACCGGAGGAAGGTGGGGATGACGTCAAGTCAT  
CATGGCCCTTACGGCCTGGGCTACACACGTGCTACAATGGTTCGGTACAGAGGGTT  
GCCAAGCCGCGAGGTGGAGCTAATCTCACAAAACCGATCGTAGTCCGGATCGCA  
GTCTGCAACTCGACTGCGTGAAGTCGGAATCGCTAGTAATCGCGAATCAGAATGT  
CGCGGTGAATACGTTCCCGGGCCTTGACACACCGCCCGTCACACCATGGGAGTG  
GGTTGCACCAGAAGTAGCTAGTCTAACCTTCGGGAGGAC

>S3

TGCAAGTCGAGCGGATGACGGGAGCTTGCTCCTTGATTACGCGGCGGACGGGTG  
AGTAATGCCTAGGAATCTGCCTGGTAGTGGGGGACAACGTTTCGAAAGGAACGC  
TAATACCGCATACTGCTACGGGAGAAAGCAGGGGACCTTCGGGCCTTGCGCTAT  
CAGATGAGCCTAGGTCGGATTAGCTAGTTGGTGGGGTAATGGCTACCAAGGCGA  
CGATCCGTAACCTGGTCTGAGAGGATGATCAGTCACACTGGAAGTGAAGACCGGT  
CCAGACTCCTACGGGAGGCAGCAGTGGGGAATATTGGACAATGGGCGAAAGCCT  
GATCCAGCCATGCCGCGTGTGTGAAGAAGGTCTTCGGATTGTAAAGCACTTTAAG  
TTGGGAGGAAGGGCAGTAAGTTAATACCTTGCTGTTTTGACGTTACCGACAGAAT  
AAGCACCGGCTAACTCTGTGCCAGCAGCCGCGTAATACAGAGGGTGCAAGCGT  
TAATCGGAATTACTGGGCGTAAAGCGCGCGTAGGTGGTTTTGTAAAGTTGGATGTG  
AAAGCCCCGGGCTCAACCTGGGAACTGCATCCAAAACCTGGCAAGCTAGAGTACG  
GTAGAGGGTGGTGGAAATTCCTGTGTAGCGGTGAAATGCGTAGATATAGGAAGGA  
ACACCAGTGGCGAAGGGCACCACCTGGACTGATACTGACACTGAGGTGCGAAA  
GCGTGGGGAGCAAACAGGATTAGATACCCTGGTAGTCCACGCCGTAAACGATGT  
CAACTAGCCGTTGGAATCCTTGAGATTTTAGTGGCGCAGCTAACGCATTAAGTTG  
ACCGCCTGGGGAGTACGGCCGCAAGGTAAAACTCAAATGAATTGACGGGGGCC  
CGACAAGCGGTGGAGCATGTGGTTAATTCGAAGCAACGCGAAGAACCTTACC  
AGGCCTTGACATGCAGAGAACTTTCCAGAGATGGATTGGTGCCTTCGGGAACTCT  
GACACAGGTGCTGCATGGCTGTCGTCAGCTCGTGTCTGTGAGATGTTGGGTAAAGT  
CCCGTAACGAGCGCAACCCTTGTCCTTAGTTACCAGCACGTTATGGTGGGCACTC  
TAAGGAGACTGCCGGTGACAAACCGGAGGAAGGTGGGGATGACGTCAAGTCAT  
CATGGCCCTTACGGCCTGGGCTACACACGTGCTACAATGGTTCGGTACAGAGGGTT  
GCCAAGCCGCGAGGTGGAGCTAATCTCACAAAACCGATCGTAGTCCGGATCGCA  
GTCTGCAACTCGACTGCGTGAAGTCGGAATCGCTAGTAATCGCGAATCAGAATGT  
CGCGGTGAATACGTTCCCGGGCCTTGACACACCGCCCGTCACACCATGGGAGTG  
GGTTGCACCAGAAGTAGCTAGTCTAACCTTCGGGAGGACGG

>S23

CAAGTCGAGCGGATGACGGGAGCTTGCTCCTTGATTACGCGGCGGACGGGTGAG  
TAATGCCTAGGAATCTGCCTGGTAGTGGGGGACAACGTTTCGAAAGGAACGCTAA  
TACCGCATACTGCTACGGGAGAAAGCAGGGGACCTTCGGGCCTTGCGCTATCAG  
ATGAGCCTAGGTCGGATTAGCTAGTTGGTGGGGTAATGGCTACCAAGGCGACGA

TCCGTA ACTGGTCTGAGAGGATGATCAGTCACACTGGA ACTGAGACACGGTCCA  
GACTCCTACGGGAGGCAGCAGTGGGGAATATTGGACAATGGGCGAAAGCCTGAT  
CCAGCCATGCCCGTGTGTGAAGAAGGTCTTCGGATTGTAAAGCACTTTAAGTTG  
GGAGGAAGGGCAGTAAGCTAATACCTTGCTGTTTTGACGTTACCGACAGAATAAG  
CACCGGCTAACTCTGTGCCAGCAGCCGCGTAATACAGAGGGTGCAAGCGTTAA  
TCGGAATTACTGGGCGTAAAGCGCGCTAGGTGGTTTTGTTAAGTTGGATGTGAAA  
GCCCCGGGCTCAACCTGGGAACTGCATCCAAA ACTGGCAAGCTAGAGTACGGTA  
GAGGGTGGTGGAAATTTCTGTGTAGCGGTGAAATGCGTAGATATAGGAAGGAAC  
ACCAGTGGCGAAGGCGACCACCTGGACTGATACTGACTGAGGTGCGAAAGC  
GTGGGAGCAAACAGGATTAGATACCCTGGTAGTCCACGCCGTAAACGATGTCA  
ACTAGCCGTTGGAATCCTTGAGATTTTAGTGGCGCAGCTAACGCATTAAGTTGAC  
CGCCTGGGAGTACGGCCGCAAGGTTAAA ACTCAAATGAATTGACGGGGGCCCG  
CACAAGCGGTGGAGCATGTGGTTTTAATTCGAAGCAACGCGAAGAACCTTACCAG  
GCCTTGACATGCAGAGAACTTTCCAGAGATGGATTGGTGCCTTCGGGAACTCTGA  
CACAGGTGCTGCATGGCTGTCGTCAGCTCGTGTCTGTGAGATGTTGGGTAAAGTCC  
CGTAACGAGCGCAACCCTTGTCCTTAGTTACCAGCACGTTATGGTGGGCACTCTA  
AGGAGACTGCCGGTGACAAACCGGAGGAAGGTGGGGATGACGTCAAGTCATCAT  
GGCCCTTACGGCCTGGGCTACACACGTGCTACAATGGTCGGTACAGAGGGTTGCC  
AAGCCGCGAGGTGGAGCTAATCTCACAAAACCGATCGTAGTCCGGATCGCAGTC  
TGCAACTCGACTGCGTGAAGTCGGAATCGCTAGTAATCGCGAATCAGAATGTCGC  
GGTGAATACGTTCCCGGGCCTTGACACACCGCCCGTCACACCATGGGAGTGGGT  
TGCACCAGAAGTAGCTAGTCTAACCTTCGGGAGGACGG

>S52

CATGCAAGTCGAGCGGATGACGGGAGCTTGCTCCTTGATT CAGCGGCGGACGGG  
TGAGTAATGCCTAGGAATCTGCCTGGTAGTGGGGGACAACGTTTCGAAAGGAAC  
GCTAATACCGCATA CGTCCTACGGGAGAAAGCAGGGGACCTTCGGGCCTTGCGCT  
ATCAGATGAGCCTAGGTCTGAGAGGATGATCAGTCACACTGGA ACTGAGACAG  
GTCCAGACTCCTACGGGAGGCAGCAGTGGGGAATATTGGACAATGGGCGAAAGC  
CTGATCCAGCCATGCCCGTGTGTGAAGAAGGTCTTCGGATTGTAAAGCACTTTA  
AGTTGGGAGGAAGGGCAGTAAGCTAATACCTTGCTGTTTTGACGTTACCGACAG  
AATAAGCACCGGCTAACTCTGTGCCAGCAGCCGCGTAATACAGAGGGTGCAAG  
CGTTAATCGGAATTACTGGGCGTAAAGCGCGCTAGGTGGTTTTGTTAAGTTGGAT  
GTGAAAGCCCCGGGCTCAACCTGGGAACTGCATCCAAA ACTGGCAAGCTAGAGT  
ACGGTAGAGGGTGGTGGAAATTTCTGTGTAGCGGTGAAATGCGTAGATATAGGAA  
GGAACACCAGTGGCGAAGGCGACCACCTGGACTGATACTGACTGAGGTGCG  
AAAGCGTGGGGAGCAAACAGGATTAGATACCCTGGTAGTCCACGCCGTAAACGA  
TGCAACTAGCCGTTGGAATCCTTGAGATTTTAGTGGCGCAGCTAACGCATTAAG  
TTGACCGCCTGGGAGTACGGCCGCAAGGTTAAA ACTCAAATGAATTGACGGGG  
GCCCGCACAAGCGGTGGAGCATGTGGTTTTAATTCGAAGCAACGCGAAGAACCTT  
ACCAGGCCTTGACATGCAGAGAACTTTCCAGAGATGGATTGGTGCCTTCGGGAA  
CTCTGACACAGGTGCTGCATGGCTGTCGTCAGCTCGTGTCTGTGAGATGTTGGGT  
AAGTCCCCTAACGAGCGCAACCCTTGTCCTTAGTTACCAGCACGTTATGGTGGGC  
ACTCTAAGGAGACTGCCGGTGACAAACCGGAGGAAGGTGGGGATGACGTCAAG

TCATCATGGCCCTTACGGCCTGGGCTACACACGTGCTACAATGGTCGGTACAGAG  
GGTTGCCAAGCCGCGAGGTGGAGCTAATCTCACAAAACCGATCGTAGTCCGGAT  
CGCAGTCTGCAACTCGACTGCGTGAAGTCGGAATCGCTAGTAATCGCGAATCAGA  
ATGTCGCGGTGAATACGTTCCCGGGCCTTGTACACACCGCCCGTCACACCATGGG  
AGTGGGTTGCACCAGAAGTAGCTAGTCTAACCTTCGGGAGGACGGT

>S521

CACATGCAAGTCGAGCGGATGACGGGAGCTTGCTCCTTGATTGAGCGGCGGACG  
GGTGAGTAATGCCTAGGAATCTGCCTGGTAGTGGGGGACAACGTTTCGAAAGGA  
ACGCTAATAACGCATACGTCCTACGGGAGAAAGCAGGGGACCTTCGGGCCTTGC  
GCTATCAGATGAGCCTAGGTCCGATTAGCTAGTTGGTGGGGTAATGGCTCACCAA  
GGCGACGATCCGTAACCTGGTCTGAGAGGATGATCAGTCACACTGGAAGTGAAGAC  
ACGGTCCAGACTCCTACGGGAGGCAGCAGTGGGGAATATTGGACAATGGGCGAA  
AGCCTGATCCAGCCATGCCGCGTGTGTGAAGAAGGTCTTCGGATTGTAAAGCACT  
TTAAGTTGGGAGGAAGGGCAGTAAGTTAATACCTTGCTGTTTTGACGTTACCGAC  
AGAATAAGCACCCGGCTAACTCTGTGCCAGCAGCCGCGTAATACAGAGGGTGCA  
AGCGTTAATCGGAATTACTGGGCGTAAAGCGCGCGTAGGTGGTTTTGTTAAGTTGG  
ATGTGAAAGCCCCGGGCTCAACCTGGGAACTGCATCCAAAACCTGGCAAGCTAGA  
GTACGGTAGAGGGTGGTGGAAATTTCTGTGTAGCGGTGAAATGCGTAGATATAGG  
AAGGAACACCAGTGGCGAAGGCGACCACCTGGACTGATACTGACACTGAGGTG  
CGAAAGCGTGGGGAGCAAACAGGATTAGATACCCTGGTAGTCCACGCCGTAAAC  
GATGTCAACTAGCCGTTGGAATCCTTGAGATTTTAGTGGCGCAGCTAACGCATTA  
AGTTGACCGCCTGGGGAGTACGGCCGCAAGGTAAAACCTCAAATGAATTGACGG  
GGGCCCGCACAAGCGGTGGAGCATGTGGTTTAAATTCGAAGCAACGCGAAGAACC  
TTACCAGGCCTTGACATGCAGAGAACTTTCCAGAGATGGATTGGTGCCTTCGGGA  
ACTCTGACACAGGTGCTGCATGGCTGTTCGTCAGCTCGTGTGCTGAGATGTTGGGT  
TAAGTCCCGTAACGAGCGCAACCCTTGTCCTTAGTTACCAGCACGTAATGGTGGG  
CACTCTAAGGAGACTGCCGGTGACAAACCGGAGGAAGGTGGGGATGACGTCAA  
GTCATCATGGCCCTTACGGCCTGGGCTACACACGTGCTACAATGGTCGGTACAGA  
GGGTTGCCAAGCCGCGAGGTGGAGCTAATCTCACAAAACCGATCGTAGTCCGGA  
TCGCAGTCTGCAACTCGACTGCGTGAAGTCGGAATCGCTAGTAATCGCGAATCAG  
AATGTGCGCGTGAATACGTTCCCGGGCCTTGTACACACCGCCCGTCACACCATGG  
GAGTGGGTTGCACCAGAAGTAGCTAGTCTAACCTTCGGGAGGACGGT

>S126

ACACATGCAAGTCGAGCGGATGACGGGAGCTTGCTCCTTGATTGAGCGGCGGAC  
GGGTGAGTAATGCCTAGGAATCTGCCTGGTAGTGGGGGACAACGTTTCGAAAGG  
AACGCTAATAACGCATACGTCCTACGGGAGAAAGCAGGGGACCTTCGGGCCTTG  
CGCTATCAGATGAGCCTAGGTCCGATTAGCTAGTTGGTGGGGTAATGGCTACCA  
AGGCGACGATCCGTAACCTGGTCTGAGAGGATGATCAGTCACACTGGAAGTGAAG  
CACGGTCCAGACTCCTACGGGAGGCAGCAGTGGGGAATATTGGACAATGGGCGA  
AAGCCTGATCCAGCCATGCCGCGTGTGTGAAGAAGGTCTTCGGATTGTAAAGCA  
CTTTAAGTTGGGAGGAAGGGCAGTAAGTTAATACCTTGCTGTTTTGACGTTACCG  
ACAGAATAAGCACCCGGCTAACTCTGTGCCAGCAGCCGCGTAATACAGAGGGTG  
CAAGCGTTAATCGGAATTACTGGGCGTAAAGCGCGCGTAGGTGGTTTTGTTAAGTT  
GGATGTGAAAGCCCCGGGCTCAACCTGGGAACTGCATCCAAAACCTGGCAAGCTA

GAGTACGGTAGAGGGTGGTGGAAATTCCTGTGTAGCGGTGAAATGCGTAGATATA  
GGAAGGAACACCAGTGGCGAAGGCGACCACCTGGACTGATACTGACACTGAGG  
TGCGAAAGCGTGGGGAGCAAACAGGATTAGATACCCTGGTAGTCCACGCCGTAA  
ACGATGTCAACTAGCCGTTGGAATCCTTGAGATTTTAGTGGCGCAGCTAACGCAT  
TAAGTTGACCGCCTGGGGAGTACGGCCGCAAGGTTAAACTCAAATGAATTGAC  
GGGGGCCCGCACAAAGCGGTGGAGCATGTGGTTTAATTCGAAGCAACGCGAAGAA  
CCTTACCAGGCCTTGACATGCAGAGAACTTTCCAGAGATGGATTGGTGCCTTCGG  
GAACTCTGACACAGGTGCTGCATGGCTGTCGTCAGCTCGTGTGCTGAGATGTTGG  
GTTAAGTCCCGTAACGAGCGCAACCCTTGTCTTAGTTACCAGCACGTTATGGTG  
GGCACTCTAAGGAGACTGCCGGTGACAAACCGGAGGAAGGTGGGGATGACGTC  
AAGTCATCATGGCCCTTACGGCCTGGGCTACACACGTGCTACAATGGTCGGTACA  
GAGGGTTGCCAAGCCGCGAGGTGGAGCTAATCTCACAAAACCGATCGTAGTCCG  
GATCGCAGTCTGCAACTCGACTGCGTGAAGTCGGAATCGCTAGTAATCGCGAATC  
AGAATGTCGCGGTGAATACGTTCCCGGGCCTTGTACACACCGCCCGTCACACCAT  
GGGAGTGGGTTGCACCAGAAGTAGCTAGTCTAACCTTCGGGAGGACGGT

>S582

ATGCAAGTCGAGCGGATGACGGGAGCTTGCTCCTTGATTCAGCGGCGGACGGGT  
GAGTAATGCCTAGGAATCTGCCTGGTAGTGGGGGACAACGTTTCGAAAGGAACG  
CTAATACCGCATACTCCTACGGGAGAAAGCAGGGGACCTTCGGGCCTTGCCTA  
TCAGATGAGCCTAGGTTCGATTAGCTAGTTGGTGGGGTAATGGCTACCAAGGCG  
ACGATCCGTAACCTGGTCTGAGAGGATGATCAGTCACACTGGAAGTGAACACGG  
TCCAGACTCCTACGGGAGGCAGCAGTGGGGAATATTGGACAATGGGCGAAAGCC  
TGATCCAGCCATGCCGCGTGTGTGAAGAAGGTCTTCGGATTGTAAAGCACTTTAA  
GTTGGGAGGAAGGGCAGTAAGTTAATACCTTGCTGTTTTGACGTTACCGACAGAA  
TAAGCACCGGCTAACTCTGTGCCAGCAGCCGCGGTAATACAGAGGGTGAAGCG  
TTAATCGGAATTAAGTGGGCGTAAAGCGCGCGTAGGTGGTTTGTAAAGTTGGATGT  
GAAAGCCCCGGGCTCAACCTGGGAACTGCATCCAAAACCTGGCAAGCTAGAGTAC  
GGTAGAGGGTGGTGGAAATTCCTGTGTAGCGGTGAAATGCGTAGATATAGGAAGG  
AACACCAGTGGCGAAGGCGACCACCTGGACTGATACTGACACTGAGGTGCGAA  
AGCGTGGGGAGCAAACAGGATTAGATACCCTGGTAGTCCACGCCGTAAACGATG  
TCAACTAGCCGTTGGAATCCTTGAGATTTTAGTGGCGCAGCTAACGCATTAAGTT  
GACCGCCTGGGGAGTACGGCCGCAAGGTTAAACTCAAATGAATTGACGGGGGC  
CCGCACAAGCGGTGGAGCATGTGGTTTAATTCGAAGCAACGCGAAGAACCTTAC  
CAGGCCTTGACATGCAGAGAACTTTCCAGAGATGGATTGGTGCCTTCGGGAACCTC  
TGACACAGGTGCTGCATGGCTGTCGTCAGCTCGTGTGCTGAGATGTTGGGTTAAG  
TCCCGTAACGAGCGCAACCCTTGTCTTAGTTACCAGCACGTTATGGTGGGCACT  
CTAAGGAGACTGCCGGTGACAAACCGGAGGAAGGTGGGGATGACGTCAAGTCA  
TCATGGCCCTTACGGCCTGGGCTACACACGTGCTACAATGGTCGGTACAGAGGGT  
TGCCAAGCCGCGAGGTGGAGCTAATCTCACAAAACCGATCGTAGTCCGGATCGC  
AGTCTGCAACTCGACTGCGTGAAGTCGGAATCGCTAGTAATCGCGAATCAGAATG  
TCGCGGTGAATACGTTCCCGGGCCTTGTACACACCGCCCGTCACACCATGGGAGT  
GGGTTGCACCAGAAGTAGCTAGTCTAACCTTCGGGAGGACGGT

>S59

CACATGCAAGTCGAGCGGATGACGGGAGCTTGCTCCTTGATTCAGCGGCGGACG

GGTGAGTAATGCCTAGGAATCTGCCTGGTAGTGGGGGACAACGTTTCGAAAGGA  
ACGCTAATACCGCATACTCCTACGGGAGAAAGCAGGGGACCTTCGGGCCTTGC  
GCTATCAGATGAGCCTAGGTCGGATTAGCTAGTTGGTGGGGTAATGGCTCACCAA  
GGCGACGATCCGTAACCTGGTCTGAGAGGATGATCAGTCACACTGGAAGTGGAGAC  
ACGGTCCAGACTCCTACGGGAGGCAGCAGTGGGGAATATTGGACAATGGGCGAA  
AGCCTGATCCAGCCATGCCGCGTGTGTGAAGAAGGTCTTCGGATTGTAAAGCACT  
TTAAGTTGGGAGGAAGGGCAGTAAGCTAATACCTTGCTGTTTTGACGTTACCGAC  
AGAATAAGCACCCGGCTAACTCTGTGCCAGCAGCCGCGTAATACAGAGGGTGCA  
AGCGTTAATCGGAATTACTGGGCGTAAAGCGCGCGTAGGTGGTTTGTAAAGTTGG  
ATGTGAAAGCCCCGGGCTCAACCTGGGAACTGCATCCAAAAGTGGCAAGCTAGA  
GTACGGTAGAGGGTGGTGGAAATTTCTGTGTAGCGGTGAAATGCGTAGATATAGG  
AAGGAACACCAGTGGCGAAGGCGACCACCTGGACTGATACTGACACTGAGGTG  
CGAAAGCGTGGGGAGCAAACAGGATTAGATACCCTGGTAGTCCACGCCGTAAAC  
GATGTCAACTAGCCGTTGGAATCCTTGAGATTTTAGTGGCGCAGCTAACGCATTA  
AGTTGACCGCCTGGGGAGTACGGCCGCAAGGTTAAAAGTCAAATGAATTGACGG  
GGGCCCGCACAAAGCGGTGGAGCATGTGGTTTAAATTCGAAGCAACGCGAAGAACC  
TTACCAGGCCTTGACATGCAGAGAACTTTCCAGAGATGGATTGGTGCCTTCGGGA  
ACTCTGACACAGGTGCTGCATGGCTGTCGTCAGCTCGTGTGCTGAGATGTTGGGT  
TAAGTCCCGTAACGAGCGCAACCCTTGTCCTTAGTTACCAGCACGTTATGGTGGG  
CACTCTAAGGAGACTGCCGGTGACAAACCCGAGGAAGGTGGGGATGACGTCAA  
GTCATCATGGCCCTTACGGCCTGGGCTACACACGTGCTACAATGGTCGGTACAGA  
GGGTTGCCAAGCCGCGAGGTGGAGCTAATCTCACAAAACCGATCGTAGTCCGGA  
TCGCAGTCTGCAACTCGACTGCGTGAAGTCGGAATCGTAGTAATCGCGAATCAG  
AATGTGCGGGTGAATACGTTCCCGGGCCTTGACACACCCGCGTCACACCATGG  
GAGTGGGTTGCACCAGAAGTAGCTAGTCTAACCTTCGGGAGGACGGT

>P34

CACATGCAAGTCGAGCGGATGACGGGAGCTTGCTCCTTGATTACGCGGCGGACG  
GGTGAGTAATGCCTAGGAATCTGCCTGGTAGTGGGGGACAACGTTTCGAAAGGA  
ACGCTAATACCGCATACTCCTACGGGAGAAAGCAGGGGACCTTCGGGCCTTGC  
GCTATCAGATGAGCCTAGGTCGGATTAGCTAGTTGGTGGGGTAATGGCTCACCAA  
GGCGACGATCCGTAACCTGGTCTGAGAGGATGATCAGTCACACTGGAAGTGGAGAC  
ACGGTCCAGACTCCTACGGGAGGCAGCAGTGGGGAATATTGGACAATGGGCGAA  
AGCCTGATCCAGCCATGCCGCGTGTGTGAAGAAGGTCTTCGGATTGTAAAGCACT  
TTAAGTTGGGAGGAAGGGCAGTAAGCTAATACCTTGCTGTTTTGACGTTACCGAC  
AGAATAAGCACCCGGCTAACTCTGTGCCAGCAGCCGCGTAATACAGAGGGTGCA  
AGCGTTAATCGGAATTACTGGGCGTAAAGCGCGCGTAGGTGGTTTGTAAAGTTGG  
ATGTGAAAGCCCCGGGCTCAACCTGGGAACTGCATCCAAAAGTGGCAAGCTAGA  
GTACGGTAGAGGGTGGTGGAAATTTCTGTGTAGCGGTGAAATGCGTAGATATAGG  
AAGGAACACCAGTGGCGAAGGCGACCACCTGGACTGATACTGACACTGAGGTG  
CGAAAGCGTGGGGAGCAAACAGGATTAGATACCCTGGTAGTCCACGCCGTAAAC  
GATGTCAACTAGCCGTTGGAATCCTTGAGATTTTAGTGGCGCAGCTAACGCATTA  
AGTTGACCGCCTGGGGAGTACGGCCGCAAGGTTAAAAGTCAAATGAATTGACGG  
GGGCCCGCACAAAGCGGTGGAGCATGTGGTTTAAATTCGAAGCAACGCGAAGAACC  
TTACCAGGCCTTGACATGCAGAGAACTTTCCAGAGATGGATTGGTGCCTTCGGGA

ACTCTGACACAGGTGCTGCATGGCTGTCGTCAGCTCGTGTCTGAGATGTTGGGT  
TAAGTCCCGTAACGAGCGCAACCCTTGTCTTAGTTACCAGCACGTTATGGTGGG  
CACTCTAAGGAGACTGCCGGTGACAAACCGGAGGAAGGTGGGGATGACGTCAA  
GTCATCATGGCCCTTACGGCCTGGGCTACACACGTGCTACAATGGTCGGTACAGA  
GGGTTGCCAAGCCGCGAGGTGGAGCTAATCTCACAAAACCGATCGTAGTCCGGA  
TCGCAGTCTGCAACTCGACTGCGTGAAGTCGGAATCGCTAGTAATCGCGAATCAG  
AATGTGCGGGTGAATACGTTCCCGGGCCTTGTACACACCGCCCCTCACACCATGG  
GAGTGGGTTGCACCAGAAGTAGCTAGTCTAACCTTCGGGAGGACGGT

>S34

TGCAAGTCGAGCGGATGATGGGAGCTTGCTCCTGGATTCAGCGGCGGACGGGTG  
AGTAATGCCTAGGAATCTGCCTGGTAGTGGGGGACAACGTTTCGAAAGGAACGC  
TAATACCGCATACTCCTACGGGAGAAAGCAGGGGACCTTCGGGCCTTGCGCTAT  
CAGATGAGCCTAGGTCCGATTAGCTAGTTGGTGGGGTAAAGGCCTACCAAGGCG  
ACGATCCGTAACCTGGTCTGAGAGGATGATCAGTCACACTGGAAGTGGACACGG  
TCCAGACTCCTACGGGAGGCAGCAGTGGGGAATATTGGACAATGGGCGAAAGCC  
TGATCCAGCCATGCCGCGTGTGTGAAGAAGGTCTTCGGATTGTAAAGCACTTTAA  
GTTGGGAGGAAGGGCAGTAAGTTAATACCTTGCTGTTTTGACGTTACCAACAGAA  
TAAGCACCGGCTAACTTCGTGCCAGCAGCCGCGGTAATACGAAGGGTGAAGCG  
TTAATCGGAATTACTGGGCGTAAAGCGCGCGTAGGTGGTTTGGTAAGATGGATGT  
GAAATCCCCGGGCTCAACCTGGGAAGTGCATCCATAACTGCCTGACTAGAGTACG  
GTAGAGGGTGGTGGAAATTTCTGTGTAGCGGTGAAATGCGTAGATATAGGAAGGA  
ACACCAGTGGCGAAGGCGACCACCTGGACTGATACTGACACTGAGGTGCGAAA  
GCGTGGGGAGCAAACAGGATTAGATACCCTGGTAGTCCACGCCGTAACGATGT  
CGACTAGCCGTTGGGATCCTTGAGATCTTAGTGGCGCAGCTAACGCGATAAGTCG  
ACCGCCTGGGGAGTACGGCCGCAAGGTTAAAACCTCAAATGAATTGACGGGGGCC  
CGCACAAGCGGTGGAGCATGTGGTTTAATTCGAAGCAACG

CGAAGAACCTTACCTGGCCTTGACATGTCCGGAACCTTGCAGAGATGCGAGGGT  
GCCTTCGGGAATCGGAACACAGGTGCTGCATGGCTGTCGTCAGCTCGTGTCTG  
AGATGTTGGGTAAAGTCCCGTAACGAGCGCAACCCTTGTCTTAGTTACCAGCAC  
CTCGGGTGGGCACTCTAAGGAGACTGCCGGTGACAAACCGGAGGAAGGTGGGG  
ATGACGTCAAGTCATCATGGCCCTTACGGCCAGGGCTACACACGTGCTACAATGG  
TCGGTACAGAGGGTTGCCAAGCCGCGAGGTGGAGCTAATCCATAAAAACCGATC  
GTAGTCCGGATCGCAGTCTGCAACTCGACTGCGTGAAGTCGGAATCGCTAGTAAT  
CGTGAATCAGAATGTCACGGTGAATACGTTCCCGGGCCTTGTACACACCGCCCCT  
CACACCATGGGAGTGGGTTGCTCCAGAAGTAGCTAGTCTAACCGCAAGGGGGAC  
GG

>P321

CACATGCAAGTCGAGCGGATGACGGGAGCTTGCTCCTTGATTCAGCGGCGGACG  
GGTGAGTAATGCCTAGGAATCTGCCTGGTAGTGGGGGACAACGTTTCGAAAGGA  
ACGCTAATACCGCATACTCCTACGGGAGAAAGCAGGGGACCTTCGGGCCTTGC  
GCTATCAGATGAGCCTAGGTCCGATTAGCTAGTTGGTGGGTAATGGCTCACCAA  
GGCGACGATCCGTAACCTGGTCTGAGAGGATGATCAGTCACACTGGAAGTGGAC  
ACGGTCCAGACTCCTACGGGAGGCAGCAGTGGGGAATATTGGACAATGGGCGAA  
AGCCTGATCCAGCCATGCCGCGTGTGTGAAGAAGGTCTTCGGATTGTAAAGCACT

TTAAGTTGGGAGGAAGGGCAGTACGTTAATACCGTGCTGTTTTGACGTTACCGAC  
AGAATAAGCACCGGCTAACTCTGTGCCAGCAGCCGCGTAATACAGAGGGTGCA  
AGCGTTAATCGGAATTACTGGGCGTAAAGCGCGCGTAGGTGGTTCGTTAAGTTGG  
ATGTGAAAGCCCCGGGCTCAACCTGGGAACTGCATCCAAAAGTGGCGAGCTAGA  
GTATGGTAGAGGGTGGTGGAAATTCCTGTGTAGCGGTGAAATGCGTAGATATAGG  
AAGGAACACCAGTGGCGAAGGCGACCACCTGGACTGATACTGACACTGAGGTG  
CGAAAGCGTGGGGAGCAAACAGGATTAGATACCCTGGTAGTCCACGCCGTAAAC  
GATGTCAACTAGCCGTTGGAATCCTTGAGATTTTAGTGGCGCAGCTAACGCATTA  
AGTTGACCGCCTGGGGAGTACGGCCGCAAGGTTAAAAGTCAAATGAATTGACGG  
GGGCCCGCACAAAGCGGTGGAGCATGTGGTTTAAATTCGAAGCAACGCGAAGAACC  
TTACCAGGCCTTGACATGCAGAGAACTTCCAGAGATGGATTGGTGCCTTCGGGA  
ACTCTGACACAGGTGCTGCATGGCTGTCGTGAGCTCGTGTGAGATGTTGGGT  
TAAGTCCCGTAACGAGCGCAACCCTTGTCCTTAGTTACCAGCACGTTATGGTGGG  
CACTCTAAGGAGACTGCCGGTGACAAACCGGAGGAAGGTGGGGATGACGTCAA  
GTCATCATGGCCCTTACGGCCTGGGCTACACACGTGCTACAATGGTTCGGTACAGA  
GGGTTGCCAAGCCGCGAGGTGGAGCTAATCTCAGAAAACCGATCGTAGTCCGGA  
TCGCAGTCTGCAACTCGACTGCGTGAAGTCGGAATCGCTAGTAATCGCGAATCAG  
AATGTCGCGGTGAATACGTTCCCGGGCCTTGACACACCGCCCGTCACACCATGG  
GAGTGGGTTGCACCAGAAGTAGCTAGTCTAACCTTCGGGAGGACGGT

>S43

GCTTCTCTTGAGAGCGGCGGACGGGTGAGTAATGCCTAGGAATCTGCCTGGTAGT  
GGGGGATAACGTTTCGGAAACGGACGCTAATACCGCATACTCCTACGGGAGAAA  
GCAGGGGACCTTCGGGCCTTGCGCTATCAGATGAGCCTAGGTTCGGATTAGCTAGT  
TGGTGAGGTAATGGCTACCAAGGCGACGATCCGTAAGTGGTCTGAGAGGATGAT  
CAGTCACACTGGAAGTGAACGACGCTCCAGACTCCTACGGGAGGCAGCAGTGG  
GGAATATTGGACAATGGGCGAAAGCCTGATCCAGCCATGCCGCGTGTGTGAAGA  
AGGTCTTCGGATTGTAAGCACTTTAAGTTGGGAGGAAGGGTTGTAGATTAATAC  
TCTGCAATTTTGACGTTACCGACAGAATAAGCACCGGCTAACTCTGTGCCAGCAG  
CCGCGGTAATACAGAGGGTGCAAGCGTTAATCGGAATTACTGGGCGTAAAGCGC  
GCGTAGGTGGTTTTGTTAAGTTGGATGTGAAATCCCCGGGCTCAACCTGGGAACTG  
CATTCAAAAAGTACTGACTGACTAGAGTATGGTAGAGGGTGGTGGAAATTCCTGTGTAG  
CGGTGAAATGCGTAGATATAGGAAGGAACACCAGTGGCGAAGGCGACCACCTGG  
ACTAATACTGACACTGAGGTGCGAAAGCGTGGGGAGCAAACAGGATTAGATACC  
CTGGTAGTCCACGCCGTAAACGATGTCAACTAGCCGTTGGAAGCCTTGAGCTTTT  
AGTGGCGCAGCTAACGCATTAAGTTGACCGCCTGGGGAGTACGGCCGCAAGGTT  
AAAAGTCAAATGAATTGACGGGGGCCCCGACAAAGCGGTGGAGCATGTGGTTTTAA  
TTCGAAGCAACGCGAAGAACCTTACCAGGCCTTGACATCCAATGAACTTTCTAGA  
GATAGATTGGTGCCTTCGGGAACATTGAGACAGGTGCTGCATGGCTGTCGTGAGC  
TCGTGTCGTGAGATGTTGGGTTAAGTCCCGTAACGAGCGCAACCCTTGTCCTTAG  
TTACCAGCACGTAATGGTGGGCACTCTAAGGAGACTGCCGGTGACAAACCGGAG  
GAAGGTGGGGATGACGTCAAGTCATCATGGCCCTTACGGCCTGGGCTACACACGT  
GCTACAATGGTTCGGTACAGAGGGTTGCCAAGCCGCGAGGTGGAGCTAATCCCAT  
AAAACCGATCGTAGTCCGGATCGCAGTCTGCAACTCGACTGCGTGAAGTCGGAA  
TCGCTAGTAATCGCGAATCAGAATGTGCGGGTGAATACGTTCCCGGGCCTTGAC

ACACCGCCCGTCACACCATGGGAGTGGGTTGCACCAGA

>S413

TTGCTTCTCTTGAGAGCGGCGGACGGGTGAGTAATGCCTAGGAATCTGCCTGGTA  
GTGGGGGATAACGTTTCGGAAACGGACGCTAATACCGCATAACGTCCTACGGGAGA  
AAGCAGGGGACCTTCGGGCCTTGCCTATCAGATGAGCCTAGGTTCGGATTAGCTA  
GTTGGTGAGGTAATGGCTCACCAAGGCGACGATCCGTAACCTGGTCTGAGAGGAT  
GATCAGTCACACTGGAACCTGAGACACGGTCCAGACTCCTACGGGAGGCAGCAGT  
GGGAATATTGGACAATGGGCGAAAGCCTGATCCAGCCATGCCGCGTGTGTGAA  
GAAGGTCTTCGGATTGTAAAGCACTTTAAGTTGGGAGGAAGGGTTGTAGATTAAT  
ACTCTGCAATTTTGACGTTACCGACAGAATAAGCACCGGCTAACTCTGTGCCAGC  
AGCCGCGTAATACAGAGGGTGCAAGCGTTAATCGGAATTACTGGGCGTAAAGC  
GCGCGTAGGTGGTTTGTAAAGTTGGATGTGAAATCCCCGGGCTCAACCTGGGAAC  
TGCATTCAAACTGACTGACTAGAGTATGGTAGAGGGTGGTGGAAATTCCTGTGT  
AGCGGTGAAATGCGTAGATATAGGAAGGAACACCAGTGGCGAAGGCGACCACCT  
GGACTAATACTGACACTGAGGTGCGAAAGCGTGGGGAGCAAACAGGATTAGATA  
CCCTGGTAGTCCACGCCGTAAACGATGTCAACTAGCCGTTGGAAGCCTTGAGCTT  
TTAGTGGCGCAGCTAACGCATTAAGTTGACCGCCTGGGGAGTACGGCCGCAAGG  
TTAAACTCAAATGAATTGACGGGGGCCCGCACAAAGCGGTGGAGCATGTGGTTT  
AATTCGAAGCAACGCGAAGAACCTTACCAGGCCTTGACATCCAATGAACTTTCTA  
GAGATAGATTGGTGCCTTCGGGAACATTGAGACAGGTGCTGCATGGCTGTCGTC  
GCTCGTGTGCTGAGATGTTGGGTTAAGTCCCGTAACGAGCGCAACCCTTGTCCTT  
AGTTACCAGCACGTAATGGTGGGCACTCTAAGGAGACTGCCGGTGACAAACCGG  
AGGAAGGTGGGGATGACGTC AAGTCATCATGGCCCTTACGGCCTGGGCTACACA  
CGTGCTACAATGGTTCGTACAGAGGGTTGCCAAGCCGCGAGGTGGAGCTAATCC  
CATAAAACCGATCGTAGTCCGGATCGCAGTCTGCAACTCGACTGCGTGAAGTCGG  
AATCGCTAGTAATCGCGAATCAGAATGTCGCGGTGAATACGTTCCCGGGCCTTGT  
ACACACCGCCCGTCACACCATGGGAGTGGGTTGCACCAGAA

>S42

CTTCTCTTGAGAGCGGCGGACGGGTGAGTAATGCCTAGGAATCTGCCTGGTAGTG  
GGGGATAACGTTTCGGAAACGGACGCTAATACCGCATAACGTCCTACGGGAGAAAG  
CAGGGGACCTTCGGGCCTTGCCTATCAGATGAGCCTAGGTTCGGATTAGCTAGTT  
GGTGAGGTAATGGCTCACCAAGGCGACGATCCGTAACCTGGTCTGAGAGGATGAT  
CAGTCACACTGGAACCTGAGACACGGTCCAGACTCCTACGGGAGGCAGCAGTGG  
GGAATATTGGACAATGGGCGAAAGCCTGATCCAGCCATGCCGCGTGTGTGAAGA  
AGGTCTTCGGATTGTAAAGCACTTTAAGTTGGGAGGAAGGGTTGTAGATTAATAC  
TCTGCAATTTTGACGTTACCGACAGAATAAGCACCGGCTAACTCTGTGCCAGCAG  
CCGCGGTAATACAGAGGGTGCAAGCGTTAATCGGAATTACTGGGCGTAAAGCGC  
GCGTAGGTGGTTTGTAAAGTTGGATGTGAAATCCCCGGGCTCAACCTGGGAACCTG  
CATTCAAACTGACTGACTAGAGTATGGTAGAGGGTGGTGGAAATTCCTGTGTAG  
CGGTGAAATGCGTAGATATAGGAAGGAACACCAGTGGCGAAGGCGACCACCTGG  
ACTAATACTGACACTGAGGTGCGAAAGCGTGGGGAGCAAACAGGATTAGATACC  
CTGGTAGTCCACGCCGTAAACGATGTCAACTAGCCGTTGGAAGCCTTGAGCTTTT  
AGTGGCGCAGCTAACGCATTAAGTTGACCGCCTGGGGAGTACGGCCGCAAGGTT  
AAAACCTCAAATGAATTGACGGGGGCCCGCACAAAGCGGTGGAGCATGTGGTTTAA



TTCGAAGCAACGCGAAGAACCTTACCAGGCCTTGACATCCAATGAACTTTCTAGA  
GATAGATTGGTGCCTTCGGGAACATTGAGACAGGTGCTGCATGGCTGTCGTCAGC  
TCGTGTCGTGAGATGTTGGGTTAAGTCCCGTAACGAGCGCAACCCTTGTCCTTAG  
TTACCAGCACGTAATGGTGGGCACTCTAAGGAGACTGCCGGTGACAAACCGGAG  
GAAGGTGGGGATGACGTCAAGTCATCATGGCCCTTACGGCCTGGGCTACACACGT  
GCTACAATGGTTCGGTACAGAGGGTTGCCAAGCCGCGAGGTGGAGCTAATCCCAT  
AAAACCGATCGTAGTCCGGATCGCAGTCTGCAACTCGACTGCGTGAAGTCGGAA  
TCGCTAGTAATCGCGAATCAGAATGTGCGGGTGAATACGTTCCCGGGCCTTGTA  
ACACCGCCCGTCACACCATGGGAGTGGGTTGCACCAGAAGTA

>S28

CACATGCAAGTCGAGCGGTAGAGAGAAGCTTGCTTCTCTTGAGAGCGGCGGACG  
GGTGAGTAATGCCTAGGAATCTGCCTGGTAGTGGGGGATAACGTTTCGGAAACGG  
ACGCTAATACCGCATACGTCTACGGGAGAAAGCAGGGGACCTTCGGGCCTTGC  
GCTATCAGATGAGCCTAGGTCGGATTAGCTAGTTGGTGAGGTAATGGCTCACCAA  
GGCTACGATCCGTAACCTGGTCTGAGAGGATGATCAGTCACACTGGAAGTGAAGC  
ACGGTCCAGACTCCTACGGGAGGCAGCAGTGGGGAATATTGGACAATGGGCGAA  
AGCCTGATCCAGCCATGCCGCGTGTGTGAAGAAGGTCTTCGGATTGTAAAGCACT  
TTAAGTTGGGAGGAAGGGCATTAACTAATACGTTAGTGTTTTGACGTTACCGAC  
AGAATAAGCACCGGCTAACTCTGTGCCAGCAGCCGCGTAATACAGAGGGTGCA  
AGCGTTAATCGGAATTACTGGGCGTAAAGCGCGCGTAGGTGGTTTGTAAAGTTGG  
ATGTGAAATCCCCGGGCTCAACCTGGGAACTGCATTCAAACTGACTGACTAGA  
GTATGGTAGAGGGTGGTGGAAATTCCTGTGTAGCGGTGAAATGCGTAGATATAGG  
AAGGAACACCAGTGGCGAAGGCGACCACCTGGACTAATACTGACACTGAGGTGC  
GAAAGCGTGGGGAGCAAACAGGATTAGATACCCTGGTAGTCCACGCCGTAAACG  
ATGTCAACTAGCCGTTGGAAGCCTTGAGCTTTTAGTGGCGCAGCTAACGCATTAA  
GTTGACCGCCTGGGGAGTACGGCCGCAAGGTTAAAACCTCAAATGAATTGACGGG  
GGCCCGCACAAAGCGGTGGAGCATGTGGTTAATTCGAAGCAACGCGAAGAACCT  
TACCAGGCCTTGACATCCAATGAACTTTCTAGAGATAGATTGGTGCCTTCGGGAA  
CATTGAGACAGGTGCTGCATGGCTGTCGTCAGCTCGTGTGTCGTGAGATGTTGGGTT  
AAGTCCCCTAACGAGCGCAACCCTTGTCCTTAGTTACCAGCACGTAATGGTGGGC  
ACTCTAAGGAGACTGCCGGTGACAAACCGGAGGAAGGTGGGGATGACGTCAAG  
TCATCATGGCCCTTACGGCCTGGGCTACACACGTGCTACAATGGTTCGGTACAGAG  
GGTTGCCAAGCCGCGAGGTGGAGCTAATCCAGAAAACCGATCGTAGTCCGGAT  
CGCAGTCTGCAACTCGACTGCGTGAAGTCGGAATCGCTAGTAATCGCGAATCAGA  
ATGTCGCGGTGAATACGTTCCCGGGCCTTGTAACACCGCCCGTCACACCATGGG  
AGTGGGTTGCACCAGAAGTAGCTAGTCTAACCTTCGGGAGGACGG

>S27

TGCAAGTCGAGCGGTAGAGAGAAGCTTGCTTCTCTTGAGAGCGGCGGACGGGTG  
AGTAATGCCTAGGAATCTGCCTGGTAGTGGGGGATAACGTTTCGGAAACGGACGCT  
AATACCGCATACGTCTACGGGAGAAAGCAGGGGACCTTCGGGCCTTGCGCTATC  
AGATGAGCCTAGGTCGGATTAGCTAGTTGGTGAGGTAATGGCTACCAAGGCGAC  
GATCCGTAACCTGGTCTGAGAGGATGATCAGTCACACTGGAAGTGAAGCACGGTC  
CAGACTCCTACGGGAGGCAGCAGTGGGGAATATTGGACAATGGGCGAAAGCCTG  
ATCCAGCCATGCCGCGTGTGTGAAGAAGGTCTTCGGATTGTAAAGCACTTTAAGT

TGGGAGGAAGGGTTGTAGATTAATACTCTGCAATTTTGACGTTACCGACAGAATA  
AGCACCGGCTAACTCTGTGCCAGCAGCCGCGGTAATACAGAGGGTGCAAGCGTT  
AATCGGAATTAAGGGCGTAAAGCGCGCGTAGGTGGTTTGTAAAGTTGGATGTGA  
AATCCCCGGGCTCAACCTGGGAAGTGCATTCAAACTGACTGACTAGAGTATGGT  
AGAGGGTGGTGAATTCCTGTGTAGCGGTGAAATGCGTAGATATAGGAAGGAA  
CACCAGTGGCGAAGGCGACCACCTGGACTAATACTGACACTGAGGTGCGAAAGC  
GTGGGGAGCAAACAGGATTAGATACCCTGGTAGTCCACGCCGTAAACGATGTCA  
ACTAGCCGTTGGAAGCCTTGAGCTTTTAGTGGCGCAGCTAACGCATTAAGTTGAC  
CGCCTGGGGAGTACGGCCGCAAGGTTAAACTCAAATGAATTGACGGGGGCCCG  
CACAAGCGGTGGAGCATGTGGTTTAATTCGAAGCAACGCGAAGAACCTTACCAG  
GCCTTGACATCCAATGAACTTTCTAGAGATAGATTGGTGCCTTCGGGAACATTGA  
GACAGGTGCTGCATGGCTGTCGTCAGCTCGTGTGTCGTGAGATGTTGGGTAAAGTCC  
CGTAACGAGCGCAACCCCTTGTCCCTTAGTTACCAGCACGTTATGGTGGGCACTCTA  
AGGAGACTGCCGGTGACAAACCGGAGGAAGGTGGGGATGACGTCAAGTCATCAT  
GGCCCTTACGGCCTGGGCTACACACGTGCTACAATGGTCGGTACAGAGGGTTGCC  
AAGCCGCGAGGTGGAGCTAATCCATAAAACCGATCGTAGTCCGGATCGCAGTCT  
GCAACTCGACTGCGTGAAGTCGGAATCGCTAGTAATCGCGAATCAGAATGTGCGG  
GTGAATACGTTCCCGGGCCTTGACACACCGCCCGTCACACCATGGGAGTGGGT  
GCACCAGAAGTAGCTAGTCTAACCTTCGGGAGGACGG

>S19

AGTCGAGCGGTAGAGAGAAGCTTGCTTCTCTTGAGAGCGGCGGACGGGTGAGTA  
ATGCCTAGGAATCTGCCTGGTAGTGGGGGATAACGTTTCGGAAACGGACGCTAATA  
CCGCATACGTCTACGGGAGAAAGCAGGGGACCTTCGGGCCTTGCCTATCAGAT  
GAGCCTAGGTTCGGATTAGCTAGTTGGTGAGGTAATGGCTCACCAAGGCGACGATC  
CGTAACTGGTCTGAGAGGATGATCAGTCACACTGGAAGTGAAGACACGGTCCAGA  
CTCCTACGGGAGGCAGCAGTGGGGAATATTGGACAATGGGCGAAAGCCTGATCC  
AGCCATGCCGCGTGTGTGAAGAAGGTCTTCGGATTGTAAAGCACTTTAAGTTGGG  
AGGAAGGGTTGTAGATTAATACTCTGCAATTTTGACGTTACCGACAGAATAAGCA  
CCGGCTAACTCTGTGCCAGCAGCCGCGGTAATACAGAGGGTGCAAGCGTTAATC  
GGAATTAAGTGGGCGTAAAGCGCGCGTAGGTGGTTTGTAAAGTTGGATGTGAAATC  
CCCGGGCTCAACCTGGGAAGTGCATTCAAACTGACTGACTAGAGTATGGTAGA  
GGGTGGTGAATTCCTGTGTAGCGGTGAAATGCGTAGATATAGGAAGGAACACC  
AGTGGCGAAGGCGACCACCTGGACTAATACTGACACTGAGGTGCGAAAGCGTGG  
GGAGCAAACAGGATTAGATACCCTGGTAGTCCACGCCGTAAACGATGTCAACTAG  
CCGTTGGAAGCCTTGAGCTTTTAGTGGCGCAGCTAACGCATTAAGTTGACCGCCT  
GGGGAGTACGGCCGCAAGGTTAAACTCAAATGAATTGACGGGGGCCCGCACAA  
GCGGTGGAGCATGTGGTTTAATTCGAAGCAACGCGAA  
GAACCTTACCAGGCCTTGACATCCAATGAACTTTCTAGAGATAGATTGGTGCCTTC  
GGGAACATTGAGACAGGTGCTGCATGGCTGTCGTCAGCTCGTGTGTCGTGAGATGTT  
GGTTAAGTCCCCTAACGAGCGCAACCCCTTGTCCCTTAGTTACCAGCACGTAATGG  
TGGGCACTCTAAGGAGACTGCCGGTGACAAACCGGAGGAAGGTGGGGATGACG  
TCAAGTCATCATGGCCCTTACGGCCTGGGCTACACACGTGCTACAATGGTCGGTA  
CAGAGGGTTGCCAAGCCGCGAGGTGGAGCTAATCCATAAAACCGATCGTAGTC  
CGGATCGCAGTCTGCAACTCGACTGCGTGAAGTCGGAATCGCTAGTAATCGCGAA

TCAGAATGTCGCGGTGAATACGTTCCCGGGCCTTGACACACCCGCCCGTCACACC  
ATGGGAGTGGGTTGCACCAGAAGTAGCTTAGTCTA

>S212

GTCGAGCGGTAGAGAGAAGCTTGCTTCTCTTGAGAGCGGCGGACGGGTGAGTAA  
TGCCTAGGAATCTGCCTGGTAGTGGGGGATAACGTTTCGGAAACGGACGCTAATAC  
CGCATACTGCTACGGGAGAAAGCAGGGGACCTTCGGGCCTTGCGCTATCAGATG  
AGCCTAGGTCGGATTAGCTAGTTGGTGAGGTAATGGCTCACCAAGGCGACGATCC  
GTA ACTGGTCTGAGAGGATGATCAGTCACACTGGA ACTGAGACACGGTCCAGAC  
TCCTACGGGAGGCAGCAGTGGGGAATATTGGACAATGGGCGAAAGCCTGATCCA  
GCCATGCCCGGTGTGTGAAGAAGGTCTTCGGATTGTAAAGCACTTTAAGTTGGGA  
GGAAGGGTTGTAGATTAATACTCTGCAATTTTGACGTTACCGACAGAATAAGCAC  
CGGCTAACTCTGTGCCAGCAGCCGCGGTAATACAGAGGGTGCAAGCGTTAATCG  
GAATTACTGGGCGTAAAGCGCGCGTAGGTGGTTTGTTAAGTTGGATGTGAAATCC  
CCGGGCTCAACCTGGGAACTGCATTCAAACTGACTGACTAGAGTATGGTAGAG  
GGTGGTGGAAATTCCTGTGTAGCGGTGAAATGCGTAGATATAGGAAGGAACACCA  
GTGGCGAAGGCGACCACCTGGACTAATACTGACACTGAGGTGCGAAAGCGTGGG  
GAGCAAACAGGATTAGATACCCTGGTAGTCCACGCCGTAAACGATGTCAACTAGC  
CGTTGGAAGCCTTGAGCTTTTAGTGCGCAGCTAACGCATTAAGTTGACCGCCTG  
GGGAGTACGGCCGCAAGGTAAA ACTCAAATGAATTGACGGGGGCCCGCACAAAG  
CGGTGGAGCATGTGGTTAATTCGAAGCAACGCGAAGAACCTTACCAGGCCTTG  
ACATCCAATGAACTTTCTAGAGATAGATTGGTGCCTTCGGGAACATTGAGACAGG  
TGCTGCATGGCTGTCGTCAGCTCGTGTGTCGTGAGATGTTGGGTTAAGTCCCGTAAC  
GAGCGCAACCCTTGTCCTTAGTTACCAGCACGTAATGGTGGGCACTCTAAGGAGA  
CTGCCGGTGACAAACCGGAGGAAGGTGGGGATGACGTCAAGTCATCATGGCCCT  
TACGGCCTGGGCTACACACGTGCTACAATGGTTCGGTACAGAGGGTTGCCAAGCC  
GCGAGGTGGAGCTAATCCATAAAACCGATCGTAGTCCGGATCGCAGTCTGCAAC  
TCGACTGCGTGAAGTCGGAATCGTAGTAATCGCGAATCAGAATGTCGCGGTGAA  
TACGTTCCCGGGCCTTGACACACCCCGTCACACCATGGGAGTGGGTTGCACC  
AGAAGTAGCTTAGTCTAACCTTCGGGAGGAC

>S217

AGCGGTAGAGAGAAGCTTGCTTCTCTTGAGAGCGGCGGACGGGTGAGTAATGCC  
TAGGAATCTGCCTGGTAGTGGGGGATAACGTTTCGGAAACGGACGCTAATACCGCA  
TACGTCTACGGGAGAAAGCAGGGGACCTTCGGGCCTTGCGCTATCAGATGAGC  
CTAGGTCGGATTAGCTAGTTGGTGAGGTAATGGCTCACCAAGGCGACGATCCGTA  
ACTGGTCTGAGAGGATGATCAGTCACACTGGA ACTGAGACACGGTCCAGACTCC  
TACGGGAGGCAGCAGTGGGGAATATTGGACAATGGGCGAAAGCCTGATCCAGCC  
ATGCCCGGTGTGTGAAGAAGGTCTTCGGATTGTAAAGCACTTTAAGTTGGGAGG  
AAGGGTTGTAGATTAATACTCTGCAATTTTGACGTTACCGACAGAATAAGCACCG  
GCTAACTCTGTGCCAGCAGCCGCGGTAATACAGAGGGTGCAAGCGTTAATCGGA  
ATTACTGGGCGTAAAGCGCGCGTAGGTGGTTTGTTAAGTTGGATGTGAAATCCCC  
GGGCTCAACCTGGGAACTGCATTCAAACTGACTGACTAGAGTATGGTAGAGGG  
TGGTGGAAATTCCTGTGTAGCGGTGAAATGCGTAGATATAGGAAGGAACACCAGT  
GGCGAAGGCGACCACCTGGACTAATACTGACACTGAGGTGCGAAAGCGTGGGG  
AGCAAACAGGATTAGATACCCTGGTAGTCCACGCCGTAAACGATGTCAACTAGCC

GTTGGAAGCCTTGAGCTTTTAGTGGCGCAGCTAACGCATTAAGTTGACCGCCTGG  
GGAGTACGGCCGCAAGGTTAAAACTCAAATGAATTGACGGGGGCCCGCACAAAGC  
GGTGGAGCATGTGGTTTAATTTCGAAGCAACGCGAAGAACC  
TTACCAGGCCTTGACATCCAATGAACTTTCTAGAGATAGATTGGTGCCTTCGGGA  
ACATTGAGACAGGTGCTGCATGGCTGTCGTGAGCTCGTGTGAGATGTTGGGT  
TAAGTCCCGTAACGAGCGCAACCCTTGTCCTTAGTTACCAGCACGTAATGGTGGG  
CACTCTAAGGAGACTGCCGGTGACAAACCGGAGGAAGGTGGGGATGACGTCAA  
GTCATCATGGCCCTTACGGCCTGGGCTACACACGTGCTACAATGGTCGGTACAGA  
GGGTTGCCAAGCCGCGAGGTGGAGCTAATCCATAAAACCGATCGTAGTCCGGAT  
CGAGTCTGCAACTCGACTGCGTGAAGTCGGAATCGCTAGTAATCGCGAATCAGA  
ATGTCGCGGTGAATACGTTCCCGGGCCTTGTAACACACCGCCCGTCACACCATGGG  
AGTGGGTTGCACCAGAAGTA

>S21

AGCGGTAGAGAGAAGCTTGCTTCTTTGAGAGCGGCGGACGGGTGAGTAATGCC  
TAGGAATCTGCCTGGTAGTGGGGGATAACGTTCCGAAACGGACGCTAATACCGCA  
TACGTCTACGGGAGAAAGCAGGGGACCTTCGGGCCTTGCGCTATCAGATGAGC  
CTAGGTCCGATTAGCTAGTTGGTGAGGTAATGGCTCACCAAGGCGACGATCCGTA  
ACTGGTCTGAGAGGATGATCAGTCACACTGGAAGTGGAGACACGGTCCAGACTCC  
TACGGGAGGCAGCAGTGGGGAATATTGGACAATGGGCGAAAGCCTGATCCAGCC  
ATGCCGCGTGTGTGAAGAAGGTCTTCGGATTGTAAAGCACTTTAAGTTGGGAGG  
AAGGGTTGTAGATTAATACTCTGCAATTTTGACGTTACCGACAGAATAAGCACCG  
GCTAACTCTGTGCCAGCAGCCGCGTAATACAGAGGGTGCAAGCGTTAATCGGA  
ATTACTGGGCGTAAAGCGCGCGTAGGTGGTTTGTAAAGTTGGATGTGAAATCCCC  
GGGCTCAACCTGGGAACTGCATTCAAACTGACTGACTAGAGTATGGTAGAGGG  
TGGTGAATTCCTGTGTAGCGGTGAAATGCGTAGATATAGGAAGGAACACCAGT  
GGCGAAGGCGACCACCTGGACTAATACTGACACTGAGGTGCGAAAGCGTGGGG  
AGCAAACAGGATTAGATACCCTGGTAGTCCACGCCGTAAACGATGTCAACTAGCC  
GTTGGAAGCCTTGAGCTTTTAGTGGCGCAGCTAACGCATTAAGTTGACCGCCTGG  
GGAGTACGGCCGCAAGGTTAAAACTCAAATGAATTGACGGGGGCCCGCACAAAGC  
GGTGGAGCATGTGGTTTAATTTCGAAGCAACGCGAAGAACC  
TTACCAGGCCTTGACATCCAATGAACTTTCTAGAGATAGATTGGTGCCTTCGGGA  
ACATTGAGACAGGTGCTGCATGGCTGTCGTGAGCTCGTGTGAGATGTTGGGT  
TAAGTCCCGTAACGAGCGCAACCCTTGTCCTTAGTTACCAGCACGTAATGGTGGG  
CACTCTAAGGAGACTGCCGGTGACAAACCGGAGGAAGGTGGGGATGACGTCAA  
GTCATCATGGCCCTTACGGCCTGGGCTACACACGTGCTACAATGGTCGGTACAGA  
GGGTTGCCAAGCCGCGAGGTGGAGCTAATCCATAAAACCGATCGTAGTCCGGAT  
CGAGTCTGCAACTCGACTGCGTGAAGTCGGAATCGCTAGTAATCGCGAATCAGA  
ATGTCGCGGTGAATACGTTCCCGGGCCTTGTAACACACCGCCCGTCACACCATGGG  
AGTGGGTTGCACCAGAAG

>P6

TGCAAGTCGAGCGGTAACACAGGGAGCTTGCTCCTGGGTGACGAGCGGCGGAC  
GGGTGAGTAATGTCTGGGAACTGCCTGATGGAGGGGGATAACTACTGGAAACG  
GTAGCTAATACCGCATAACGTCGCAAGACCAAAGAGGGGGACCTTCGGGCCTCT  
TGCCATCGGATGTGCCAGATGGGATTAGCTAGTAGGTGGGGTAACGGCTCACCT

AGGCGACGATCCCTAGCTGGTCTGAGAGGATGACCAGCCACACTGGAAGTGA  
CACGGTCCAGACTCCTACGGGAGGCAGCAGTGGGGAATATTGCACAATGGGCGC  
AAGCCTGATGCAGCCATGCCGCGTGTATGAAGAAGGCCTTCGGGTTGTAAAGTAC  
TTTCAGCGAGGAGGAAGGCATTAAGGTTAATAACCTTGGTGATTGACGTTACTCG  
CAGAAGAAGCACCCGGCTAACTCCGTGCCAGCAGCCGCGTAATACGGAGGGTGC  
AAGCGTTAATCGGAATTACTGGGCGTAAAGCGCACGCAGGCGGTCTGTCAAGTC  
GGATGTGAAATCCCCGGGCTCAACCTGGGAAGTGCATTTCGAAACTGGCAGGCTA  
GAGTCTTGTAGAGGGGGGTAGAATTCCAGGTGTAGCGGTGAAATGCGTAGAGAT  
CTGGAGGAATACCGGTGGCGAAGGCGGCCCCCTGGACAAAGACTGACGCTCAG  
GTGCGAAAGCGTGGGGAGCAAACAGGATTAGATACCCTGGTAGTCCACGCCGTA  
AACGATGTGATTTGGAGGTTGTTCCCTTGAGGAGTGGCTTCCGGAGCTAACGCG  
TTAAATCGACCGCCTGGGGAGTACGGCCGCAAGGTTAAACTCAAATGAATTGA  
CGGGGGCCCCGCACAAGCGGTGGAGCATGTGGTTTAATTCGATGCAACGCGAAGA  
ACCTTACCTACTCTTGACATCCAGAGAACTTACCAGAGATGGATTGGTGCCTTCG  
GGAAGTCTGAGACAGGTGCTGCATGGCTGTCTCAGCTCGTGTGTTGTGAAATGTTG  
GGTTAAGTCCCGCAACGAGCGCAACCCTTATCCTTTGTTGCCAGCGGTTCCGGCCG  
GGAAGTCAAAGGAGACTGCCAGTGATAAACTGGAGGAAGGTGGGGATGACGTC  
AAGTCATCATGGCCCTTACGAGTAGGGCTACACACGTGCTACAATGGCATATACA  
AAGAGAAGCGACCTCGCGAGAGCAAGCGGACCTCATAAAGTATGTCGTAGTCCG  
GATTGGAGTCTGCAACTCGACTCCATGAAGTCGGAATCGCTAGTAATCGTAGATC  
AGAATGCTACGGTGAATACGTTCCCGGGCCTTGTACACACCGCCCGTCACACCAT  
GGGAGTGGGTTGCAAAAGAAGTAGGTAGCTTAACCTTCGGGAGGGCG

>S24

TGCAAGTCGAGCGGTAGAGAGAAGCTTGCTTCTCTTGAGAGCGGCGGACGGGTG  
AGTAATGCCTAGGAATCTGCCTGGTAGTGGGGGATAACGTTCCGAAACGGACGCT  
AATACCGCATACTCCTACGGGAGAAAGCAGGGGACCTTCGGGCCTTGCCTATC  
AGATGAGCCTAGGTTCGGATTAGCTAGTTGGTGAGGTAATGGCTACCAAGGCGAC  
GATCCGTAAGTGGTCTGAGAGGATGATCAGTCACACTGGAAGTGAAGACCGGTC  
CAGACTCCTACGGGAGGCAGCAGTGGGGAATATTGGACAATGGGCGAAAGCCTG  
ATCCAGCCATGCCGCGTGTGTGAAGAAGGTCTTCGGATTGTAAAGCACTTTAAGT  
TGGGAGGAAGGGTTGTAGATTAATACTCTGCAATTTTGACGTTACCGACAGAATA  
AGCACCGGCTAACTCTGTGCCAGCAGCCGCGTAATACAGAGGGTGAAGCGTT  
AATCGGAATTACTGGGCGTAAAGCGCGCGTAGGTGGTTTGTAAAGTTGGATGTGA  
AATCCCCGGGCTCAACCTGGGAAGTGCATTCAAAGTACTGACTGACTAGAGTATGGT  
AGAGGGTGGTGAATTCCTGTGTAGCGGTGAAATGCGTAGATATAGGAAGGAA  
CACCAGTGGCGAAGGCGACCACTGGACTAATACTGACACTGAGGTGCGAAAGC  
GTGGGGAGCAAACAGGATTAGATACCCTGGTAGTCCACGCCGTAACGATGTCA  
ACTAGCCGTTGGAAGCCTTGAGCTTTTAGTGGCGCAGCTAACGCATTAAGTTGAC  
CGCCTGGGGAGTACGGCCGCAAGGTTAAACTCAAATGAATTGACGGGGGCCCG  
CACAAGCGGTGGAGCATGTGGTTTAATTCGAAGCAACGCGAAGAACCTTACCAG  
GCCTTGACATCCAATGAACTTTCTAGAGATAGATTGGTGCCTTCGGGAACATTGA  
GACAGGTGCTGCATGGCTGTCTCAGCTCGTGTCTGAGATGTTGGGTTAAGTCC  
CGTAACGAGCGCAACCCTTGTCTTAGTTACCAGCACGTTATGGTGGGCACTCTA  
AGGAGACTGCCGGTGACAAACCGGAGGAAGGTGGGGATGACGTCAAGTCATCAT

GGCCCTTACGGCCTGGGCTACACACGTGCTACAATGGTCGGTACAGAGGGTTGCC  
AAGCCGCGAGGTGGAGCTAATCCCATAAAACCGATCGTAGTCCGGATCGCAGTCT  
GCAACTCGACTGCGTGAAGTCGGAATCGCTAGTAATCGCGAATCAGAATGTCCGG  
GTGAATACGTTCCCGGGCCTTGTACACACCGCCCGTCACACCATGGGAGTGGGT  
GCACCAGAAGTAGCTAGTCTAACCTTCGGGAGGAC

>P25

CATGCAAGTCGGACGGTAGCACAGAGGAGCTTGCTCCTCGGGTGACGAGTGGCG  
GACGGGTGAGTAATGTCTGGGGATCTGCCCCGATAGAGGGGGATAACCACTGGAA  
ACGGTGGCTAATACCGCATAACGTCGCAAGACCAAAGAGGGGGACCTTCGGGCC  
TCTACTATCGGATGAACCCAGATGGGATTAGCTAGTAGGCGGGGTAACGGCCCA  
CCTAGGCGACGATCCCTAGCTGGTCTGAGAGGATGACCAGCCACACTGGAAGT  
AGACACGGTCCAGACTCCTACGGGAGGCAGCAGTGGGGAATATTGCACAATGGG  
CGCAAGCCTGATGCAGCCATGCCGCGTGTATGAAGAAGGCCTTCGGGTTGTA  
GTACTTTCAGCGGGGAGGAAGGCGATGTGGTTAATAACCGCGTCGATTGACGTTA  
CCTGCAGAAGAAGCACCGGCTAACTCCGTGCCAGCAGCCGCGGTAATACGGAGG  
GTGCAAGCGTTAATCGGAATTACTGGGCGTAAAGCGCACGCAGGCGGTCTGT  
AGTCAGATGTGAAATCCCCGGGCTTAACCTGGGAACTGCATTTGAAACTGGCAG  
GCTTGAGTCTCGTAGAGGGGGGTAGAATTCAGGTGTAGCGGTGAAATGCGTAG  
AGATCTGGAGGAATACCGGTGGCGAAGGCGGCCCCCTGGACGAAGACTGACGCT  
CAGGTGCGAAAGCGTGGGGAGCAAACAGGATTAGATACCCTGGTAGTCCACGCC  
GTAACGATGTCGACTTGGAGGTTGTTCCCTTGAGGAGTGGCTTCGGGAGCTAAC  
GCGTTAAGTCGACCGCCTGGGGAGTACGGCCGCAAGGTTAAACTCAAATGAAT  
TGACGGGGGCCCCGCACAAGCGGTGGAGCATGTGGTTAATTCGATGCAACGCGA  
AGAACCTTACCTACTCTTGACATCCACGAATTTGGCAGAGATGCCTTAGTGCCT  
TCGGGAACCGTGAGACAGGTGCTGCATGGCTGTCTCAGCTCGTGTTGTGAAAT  
GTTGGGTTAAGTCCCGCAACGAGCGCAACCCTTATCCTTTGTTGCCAGCGATT  
GTCGGGAACTCAAAGGAGACTGCCGGTGATAAACCGGAGGAAGGTGGGGATGA  
CGTCAAGTCATCATGGCCCTTACGAGTAGGGCTACACACGTGCTACAATGGCGCA  
TACAAAGAGAAGCGACCTCGCGAGAGCAAGCGGACCTCATAAAGTGCGTCTAG  
TCCGGATCGGAGTCTGCAACTCGACTCCGTGAAGTCGGAATCGCTAGTAATCGTG  
GATCAGAATGCCACGGTGAATACGTTCCCGGGCCTTGTACACACCGCCCGTCACA  
CCATGGGAGTGGGTTGCAAAGAAGTAGGTAGCTTAACCTTCGGGAGGGCGCTT  
ACC

>S216

CATGCAAGTCGGACGGTAGCACAGGGGAGCTTGCTCCTCGGGTGACGAGTGGCG  
GACGGGTGAGTAATGTCTGGGGATCTGCCCCGATAGAGGGGGATAACCACTGGAA  
ACGGTGGCTAATACCGCATAACGTCGCAAGACCAAAGAGGGGGACCTTCGGGCC  
TCTACTATCGGATGAACCCAGATGGGATTAGCTAGTAGGCGGGGTAACGGCCCA  
CCTAGGCGACGATCCCTAGCTGGTCTGAGAGGATGACCAGCCACACTGGAAGT  
AGACACGGTCCAGACTCCTACGGGAGGCAGCAGTGGGGAATATTGCACAATGGG  
CGCAAGCCTGATGCAGCCATGCCGCGTGTATGAAGAAGGCCTTCGGGTTGTA  
GTACTTTCAGCGGGGAGGAAGGCGATAAGGTTAATAACCTTGTTCGATTGACGTTA  
CCCGCAGAAGAAGCACCGGCTAACTCCGTGCCAGCAGCCGCGGTAATACGGAGG  
GTGCAAGCGTTAATCGGAATTACTGGGCGTAAAGCGCACGCAGGCGGTCTGT  
TAA

AGTCAGATGTGAAATCCCCGGGCTTAACCTGGGAACTGCATTTGAGACTGGCAG  
GCTTGAGTCTCGTAGAGGGGGGTAGAATTCCAGGTGTAGCGGTGAAATGCGTAG  
AGATCTGGAGGAATACCGGTGGCGAAGGCGGCCCCCTGGACGAAGACTGACGCT  
CAGGTGCGAAAGCGTGGGGAGCAAACAGGATTAGATACCCTGGTAGTCCACGCC  
GTAAACGATGTCTGACTTGGAGGTTGTCCCTTGAGGAGTGGCTTCCGGAGCTAAC  
GCGTTAAGTCGACCGCCTGGGGAGTACGGCCGCAAGGTTAAACTCAAATGAAT  
TGACGGGGGCCCCGCACAAGCGGTGGAGCATGTGGTTTAATTCGATGCAACGCGA  
AGAACCTTACCTACTCTTGACATCCACGGAATTTGGCAGAGATGCCTTAGTGCCT  
TCGGGAACCGTGAGACAGGTGCTGCATGGCTGTCGTCAGCTCGTGTTGTGAAAT  
GTTGGGTTAAGTCCCGCAACGAGCGCAACCCTTATCCTTTGTTGCCAGCGATTTCG  
GTCGGGAACTCAAAGGAGACTGCCGGTGATAAACCGGAGGAAGGTGGGGATGA  
CGTCAAGTCATCATGGCCCTTACGAGTAGGGCTACACACGTGCTACAATGGCGCA  
TACAAAGAGGAGCGACCTCGCGAGAGCAAGCGGACCTCATAAAGTGCGTCTAGT  
TCCGGATCGGAGTCTGCAACTCGACTCCGTGAAGTCGGAATCGCTAGTAATCGTG  
GATCAGAATGCCACGGTGAATACGTTCCCGGGCCTTGTACACACCGCCCGTCACA  
CCATGGGAGTGGGTTGCAAAGAAGTAGGTAGCTTAACCTTCGGGAGGGCGCT

>S322

CATGCAAGTCGAACGGCAGCACAGAAGAGCTTGCTCTTTGGGTGGCGAGTGGCG  
GACGGGTGAGTAATGTCTGGGAACTGCCCGATGGAGGGGGATAACTACTGGAA  
ACGGTAGCTAATACCGCATAACGTCGCAAGACCAAAGTGGGGGACCTTCGGGCC  
TCACACCATCGGATGTGCCAGATGGGATTAGCTAGTAGGTGGGGTAATGGCTCA  
CCTAGGCGACGATCCCTAGCTGGTCTGAGAGGATGACCAGCCACACTGGAAGT  
AGACACGGTCCAGACTCCTACGGGAGGCAGCAGTGGGGAATATTGCACAATGGG  
CGCAAGCCTGATGCAGCCATGCCCGTGTATGAAGAAGGCCTTCGGGTTGTA  
GTAACCTTTCAGCGGGGAGGAAGGCGGTGAGGTTAATAACCTTGCCGATTGACGTTA  
CCCGCAGAAGAAGCACCGGCTAACTCCGTGCCAGCAGCCGCGGTAATACGGAGG  
GTGCAAGCGTTAATCGGAATTAAGTGGGCGTAAAGCGCACGCAGGCGGTCTGT  
AGTCAGATGTGAAATCCCCGGGCTTAACCTGGGAACTGCATTTGAAACTGGCAG  
GCTTGAGTCTCGTAGAGGGGGGTAGAATTCCAGGTGTAGCGGTGAAATGCGTAG  
AGATCTGGAGGAATACCGGTGGCGAAGGCGGCCCCCTGGACGAAGACTGACGCT  
CAGGTGCGAAAGCGTGGGGAGCAAACAGGATTAGATACCCTGGTAGTCCACGCC  
GTAAACGATGTCTGACTTGGAGGTTGTGCCCTTGAGGCGTGGCTTCCGGAGCTAAC  
GCGTTAAGTCGACCGCCTGGGGAGTACGGCCGCAAGGTTAAACTCAAATGAAT  
TGACGGGGGCCCCGCACAAGCGGTGGAGCATGTGGTTTAATTCGATGCAACGCGA  
AGAACCTTACCTGGCCTTGACATCCAGAGAACTTAGCAGAGATGCTTTGGTGCCT  
TCGGGAACCTCTGAGACAGGTGCTGCATGGCTGTCGTCAGCTCGTGTTGTGAAATG  
TTGGGTTAAGTCCCGCAACGAGCGCAACCCTTATCCTTTGTTGCCAGCGGTTCCG  
CCGGGAACTCAAAGGAGACTGCCGGTGATAAACCGGAGGAAGGTGGGGATGAC  
GTCAAGTCATCATGGCCCTTACGGCCAGGGCTACACACGTGCTACAATGGCGCAT  
ACAAAGAGAAGCGACCTCGCGAGAGCAAGCGGACCTCATAAAGTGCGTCTAGT  
CCGGATTGGAGTCTGCAACTCGACTCCATGAAGTCGGAATCGCTAGTAATCGTAG  
ATCAGAATGCTACGGTGAATACGTTCCCGGGCCTTGTACACACCGCCCGTCACAC  
CATGGGAGTGGGTTGCAAAGAAGTAGGTAGCTTAACCTTCGGGAGGGCGCT

>S335





AGAACCTTACCTGGTCTTGACATCCACGGAAGTTTTTCAGAGATGAGAATGTGCCT  
TCGGGAACCGTGAGACAGGTGCTGCATGGCTGTCGTCAGCTCGTGTTGTGAAAT  
GTTGGGTTAAGTCCCGCAACGAGCGCAACCCTTATCCTTTGTTGCCAGCGGTCCG  
GCCGGAACTCAAAGGAGACTGCCAGTGATAAACTGGAGGAAGGTGGGGATGA  
CGTCAAGTCATCATGGCCCTTACGACCAGGGCTACACACGTGCTACAATGGCGCA  
TACAAAGAGAAGCGACCTCGCGAGAGCAAGCGGACCTCATAAAGTGCGTCTAG  
TCCGGATTGGAGTCTGCAACTCGACTCCATGAAGTCGGAATCGCTAGTAATCGTG  
GATCAGAATGCCACGGTGAATACGTTCCCGGGCCTTGTACACACCCGCCCGTCACA  
CCATGGGAGTGGGTTGCAAAAGAAGTAGGTAGCTTAACCTTCGGGAGGGCGCT

>S224

AGTCGAACGGTAACAGGAAGAAGCTTGCTTCTTTGCTGACGAGTGGCGGACGGG  
TGAGTAATGTCTGGGAACTGCCTGATGGAGGGGGATAACTACTGGAAACGGTA  
GCTAATACCGCATAACGTTCGCAAGACCAAAGAGGGGGACCTTCGGGCCTCTTGC  
CATCGGATGTGCCAGATGGGATTAGCTAGTAGGTGGGGTAACGGCTCACCTAGG  
CGACGATCCCTAGCTGGTCTGAGAGGATGACCAGCCACACTGGAAGTGAAGACAC  
GGTCCAGACTCCTACGGGAGGCAGCAGTGGGGAATATTGCACAATGGGCGCAAG  
CCTGATGCAGCCATGCCGCGTGTATGAAGAAGGCCTTCGGGTTGTAAAGTACTTT  
CAGCGGGGAGGAAGGGAGTAAAGTTAATACCTTTGCTCATTGACGTTACCCGCA  
GAAGAAGCACCGGCTAACTCCGTGCCAGCAGCCGCGGTAATACGGAGGGTGCAA  
GCGTTAATCGGAATTAAGTGGGCGTAAAGCGCACGCAGGCGGTTTGTAAAGTCAGA  
TGTGAAATCCCCGGGCTCAACCTGGGAACTGCATCTGATACTGGCAAGCTTGAGT  
CTCGTAGAGGGGGGTAGAATTCAGGTGTAGCGGTGAAATGCGTAGAGATCTGG  
AGGAATACCGGTGGCGAAGGCGGCCCTGGACGAAGACTGACGCTCAGGTGC  
GAAAGCGTGGGGAGCAAACAGGATTAGATACCCTGGTAGTCCACGCCGTAACG  
ATGTCGACTTGGAGGTTGTGCCCTTGAGGCGTGGCTTCCGGAGCTAACGCGTTAA  
GTCGACCGCCTGGGGAGTACGGCCGCAAGGTTAAAACCTCAAATGAATTGACGGG  
GGCCCGCACAAAGCGGTGGAGCATGTGGTTAATTCGATGCAACGCGAAGAACCT  
TACCTGGTCTTGACATCCACGGAAGTTTTTCAGAGATGAGAATGTGCCTTCGGGAA  
CCGTGAGACAGGTGCTGCATGGCTGTCGTCAGCTCGTGTTGTGAAATGTTGGGTT  
AAGTCCCAGCAACGAGCGCAACCCTTATCCTTTGTTGCCAGCGGTCCGGCCGGGA  
ACTCAAAGGAGACTGCCAGTGATAAACTGGAGGAAGGTGGGGATGACGTC AAG  
TCATCATGGCCCTTACGACCAGGGCTACACACGTGCTACAATGGCGCATACAAAG  
AGAAGCGACCTCGCGAGAGCAAGCGGACCTCATAAAGTGCGTCTAGTCCGGAT  
TGGAGTCTGCAACTCGACTCCATGAAGTCGGAATCGCTAGTAATCGTGGATCAGA  
ATGCCACGGTGAATACGTTCCCGGGCCTTGTACACACCCGCCCGTCACACCATGGG  
AGTGGGTTGCAAAAGAAGTAGGTAGCTTAACCTTCGGGAGGGCGCTT

>S38

ATGCAAGTCGAACGGTAACAGGAAGCAGCTTGCTGCTTTGCTGACGAGTGGCGG  
ACGGGTGAGTAATGTCTGGGAACTGCCTGATGGAGGGGGATAACTACTGGAAA  
CGGTAGCTAATACCGCATAACGTTCGCAAGACCAAAGAGGGGGACCTTCGGGCCT  
CTTGCCATCAGATGTGCCAGATGGGATTAGCTAGTAGGTGGGGTAACGGCTCAC  
CTAGGCGACGATCCCTAGCTGGTCTGAGAGGATGACCAGCCACACTGGAAGTGA  
GACACGGTCCAGACTCCTACGGGAGGCAGCAGTGGGGAATATTGCACAATGGGC  
GCAAGCCTGATGCAGCCATGCCGCGTGTATGAAGAAGGCCTTCGGGTTGTAAAGT

ACTTTCAGCGGGGAGGAAGGCGATGTGGTTAATAACCGCGTCGATTGACGTTACC  
CGCAGAAGAAGCACCGGCTAACTCCGTGCCAGCAGCCGCGGTAATACGGAGGGT  
GCAAGCGTTAATCGGAATTACTGGGCGTAAAGCGCACGCAGGCGGTCTGTCAAG  
TCGGATGTGAAATCCCCGGGCTCAACCTGGGAACTGCATCCGAAACTGGCAGGC  
TTGAGTCTCGTAGAGGGGGGTAGAATTCCAGGTGTAGCGGTGAAATGCGTAGAG  
ATCTGGAGGAATACCGGTGGCGAAGGCGGCCCTGGACGAAGACTGACGCTCA  
GGTGCGAAAGCGTGGGGAGCAAACAGGATTAGATACCCTGGTAGTCCACGCCGT  
AAACGATGTCGACTTGGAGGTTGTGCCCTTGAGGCGTGGCTTCCGGAGCTAACG  
CGTTAAGTCGACCGCCTGGGGAGTACGGCCGCAAGGTTAAAACCTCAAATGAATT  
GACGGGGGCCCGCACAAAGCGGTGGAGCATGTGGTTTAATTCGATGCAACGCGAA  
GAACCTTACCTGGTCTTGACATCCACAGAACTTTCCAGAGATGGATTGGTGCCTT  
CGGGAACGTGAGACAGGTGCTGCATGGCTGTCGTCAGCTCGTGTTGTGAAATG  
TTGGGTTAAGTCCCGCAACGAGCGCAACCCTTATCCTTTGTTGCCAGCGGTCCGG  
CCGGGAACCTCAAAGGAGACTGCCAGTGATAAACTGGAGGAAGGTGGGGATGAC  
GTCAAGTCATCATGGCCCTTACGACCAGGGCTACACACGTGCTACAATGGCGCAT  
ACAAAGAGAAGCAATCTCGCGAGAGCTAGCGGACCTCATAAAGTGCGTCTAGT  
CCGGATTGGAGTCTGCAACTCGACTCCATGAAGTCGGAATCGCTAGTAATCGTGA  
ATCAGAATGTCACGGTGAATACGTTCCCGGGCCTTGACACACCGCCCGTCACAC  
CATGGGAGTGGGTTGCAAAAGAAGTAGGTAGCTTAACCTTCGGGAGGGCGCT

>S323

ATGCAAGTCGAACGGTAACAGGAAGCAGCTTGCTGCTTTGCTGACGAGTGGCGG  
ACGGGTGAGTAATGTCTGGGAACTGCCTGATGGAGGGGGATAACTACTGGAAA  
CGGTAGCTAATACCGCATAACGTCGCAAGACCAAAGAGGGGGACCTTCGGGCCT  
CTTGCCATCAGATGTGCCCAGATGGGATTAGCTAGTAGGTGGGGTAACGGCTCAC  
CTAGGCGACGATCCCTAGCTGGTCTGAGAGGATGACCAGCCACACTGGAACCTGA  
GACACGGTCCAGACTCCTACGGGAGGCAGCAGTGGGGAATATTGCACAATGGGC  
GCAAGCCTGATGCAGCCATGCCGCGTGTATGAAGAAGGCCTTCGGGTTGTAAAGT  
ACTTTCAGCGGGGAGGAAGGCGATGTGGTTAATAACCGCGTCGATTGACGTTACC  
CGCAGAAGAAGCACCGGCTAACTCCGTGCCAGCAGCCGCGGTAATACGGAGGGT  
GCAAGCGTTAATCGGAATTACTGGGCGTAAAGCGCACGCAGGCGGTCTGTCAAG  
TCGGATGTGAAATCCCCGGGCTCAACCTGGGAACTGCATCCGAAACTGGCAGGC  
TTGAGTCTCGTAGAGGGGGGTAGAATTCCAGGTGTAGCGGTGAAATGCGTAGAG  
ATCTGGAGGAATACCGGTGGCGAAGGCGGCCCTGGACGAAGACTGACGCTCA  
GGTGCGAAAGCGTGGGGAGCAAACAGGATTAGATACCCTGGTAGTCCACGCCGT  
AAACGATGTCGACTTGGAGGTTGTGCCCTTGAGGCGTGGCTTCCGGAGCTAACG  
CGTTAAGTCGACCGCCTGGGGAGTACGGCCGCAAGGTTAAAACCTCAAATGAATT  
GACGGGGGCCCGCACAAAGCGGTGGAGCATGTGGTTTAATTCGATGCAACGCGAA  
GAACCTTACCTGGTCTTGACATCCACAGAACTTTCCAGAGATGGATTGGTGCCTT  
CGGGAACGTGAGACAGGTGCTGCATGGCTGTCGTCAGCTCGTGTTGTGAAATG  
TTGGGTTAAGTCCCGCAACGAGCGCAACCCTTATCCTTTGTTGCCAGCGGTCCGG  
CCGGGAACCTCAAAGGAGACTGCCAGTGATAAACTGGAGGAAGGTGGGGATGAC  
GTCAAGTCATCATGGCCCTTACGACCAGGGCTACACACGTGCTACAATGGCGCAT  
ACAAAGAGAAGCAATCTCGCGAGAGCTAGCGGACCTCATAAAGTGCGTCTAGT  
CCGGATTGGAGTCTGCAACTCGACTCCATGAAGTCGGAATCGCTAGTAATCGTGA

ATCAGAATGTCACGGTGAATACGTTCCCGGGCCTTGTACACACCGCCCGTCACAC  
CATGGGAGTGGGTGCAAAAGAAGTAGGTAGCTTAACCTTCGGGAGGGCGCT

>P13

CACATGCAAGTCGAGCGGTAACACAGGGAGCTTGCTCCTGGGTGACGAGCGGCG  
GACGGGTGAGTAATGTCTGGGAACTGCCCGATGGAGGGGGATAACTACTGGAA  
ACGGTAGCTAATACCGCATAATGTCGCAAGACCAAAGAGGGGGACCTTCGGGCC  
TCTTGCCATCGGATGTGCCAGATGGGATTAGCTAGTAGGTGGGGTAACGGCTCA  
CCTAGGCGACGATCCCTAGCTGGTCTGAGAGGATGACCAGCCACACTGGAACCTG  
AGACACGGTCCAGACTCCTACGGGAGGCAGCAGTGGGGAATATTGCACAATGGG  
CGAAGCCTGATGCAGCCATGCCGCGTGTATGAAGAAGGCCTTCGGGTTGTA  
GTAACCTTCAGCGAGGAGGAAGGCATTAAGGTTAATAACCTTGGTGATTGACGTTA  
CTCGCAGAAGAAGCACCGGCTAACTCCGTGCCAGCAGCCGCGGTAATACGGAGG  
GTGCAAGCGTTAATCGGAATTACTGGGCGTAAAGCGCACGCAGGCGGTCTGTCA  
AGTCGGATGTGAAATCCCCGGGCTCAACCTGGGAACTGCATTGAAACTGGCAG  
GCTAGAGTCTTGTAGAGGGGGGTAGAATTCCAGGTGTAGCGGTGAAATGCGTAG  
AGATCTGGAGGAATACCGGTGGCGAAGGCGGCCCCCTGGACAAAGACTGACGCT  
CAGGTGCGAAAGCGTGGGGAGCAAACAGGATTAGATACCCTGGTAGTCCACGCC  
GTAAACGATGTGATTTGGAGGTTGTTCCCTTGAGGAGTGGCTTCCGGAGCTAAC  
GCGTTAAATCGACCGCCTGGGGAGTACGGCCGCAAGGTTAAACTCAAATGAAT  
TGACGGGGGCCCGCACAAAGCGGTGGAGCATGTGGTTTAAATTCGATGCAACGCGA  
AGAACCTTACCTACTCTTGACATCCAGAGAACTTTCCAGAGATGGATTGGTGCCT  
TCGGGAACTCTGAGACAGGTGCTGCATGGCTGTCGTCAGCTCGTGTGTAATG  
TTGGGTTAAGTCCCGCAACGAGCGCAACCCTTATCCTTTGTTGCCAGCGGTTCCG  
CCGGGAACTCAAAGGAGACTGCCAGTGATAAACTGGAGGAAGGTGGGGATGAC  
GTCAAGTCATCATGGCCCTTACGAGTAGGGCTACACACGTGCTACAATGGCATATA  
CAAAGAGAAGCGACCTCGCGAGAGCAAGCGGACCTCATAAAGTATGTCGTAGTC  
CGGATTGGAGTCTGCAACTCGACTCCATGAAGTCGGAATCGCTAGTAATCGTAGA  
TCAGAATGCTACGGTGAATACGTTCCCGGGCCTTGTACACACCGCCCGTCACACC  
ATGGGAGTGGGTTGCAAAAGAAGTAGGTAGCTTAACCTTCGGGAGGGCGCTTAC  
C

>P17

AATGCAAGTCGAGCGGTAACACAGGGAGCTTGCTCCTGGGTGACGAGCGGCGG  
ACGGGTGAGTAATGTCTGGGAACTGCCTGATGGAGGGGGATAACTACTGGAAA  
CGGTAGCTAATACCGCATAATGTCGCAAGACCAAAGAGGGGGACCTTCGGGCCT  
CTTGCCATCGGATGTGCCAGATGGGATTAGCTAGTAGGTGGGGTAACGGCTCAC  
CTAGGCGACGATCCCTAGCTGGTCTGAGAGGATGACCAGCCACACTGGAACCTGA  
GACACGGTCCAGACTCCTACGGGAGGCAGCAGTGGGGAATATTGCACAATGGGC  
GCAAGCCTGATGCAGCCATGCCGCGTGTATGAAGAAGGCCTTCGGGTTGTA  
AAGTACTTTTCAGCGAGGAGGAAGGCATTAAGGTTAATAACCTTGGTGATTGACGTTACT  
CGCAGAAGAAGCACCGGCTAACTCCGTGCCAGCAGCCGCGGTAATACGGAGGGT  
GCAAGCGTTAATCGGAATTACTGGGCGTAAAGCGCACGCAGGCGGTCTGTCAAG  
TCGGATGTGAAATCCCCGGGCTCAACCTGGGAACTGCATTGAAACTGGCAGGC  
TAGAGTCTTGTAGAGGGGGGTAGAATTCCAGGTGTAGCGGTGAAATGCGTAGAG  
ATCTGGAGGAATACCGGTGGCGAAGGCGGCCCCCTGGACAAAGACTGACGCTCA

GGTGC GAAAGCGTGGGGAGCAAACAGGATTAGATACCCTGGTAGTCCACGCCGT  
AAACGATGTCGATTTGGAGGTTGTTCCCTTGAGGAGTGGCTTCCGGAGCTAACGC  
GTTAAATCGACCGCCTGGGGAGTACGGCCGCAAGGTTAAACTCAAATGAATTG  
ACGGGGGCCCGCACAAGCGGTGGAGCATGTGGTTTAATTCGATGCAACGCGAAG  
AACCTTACCTACTCTTGACATCCAGAGAACTTTCCAGAGATGGATTGGTGCCTTC  
GGAACTCTGAGACAGGTGCTGCATGGCTGTCGTCAGCTCGTGTGTGAAATGTT  
GGGTTAAGTCCC GCAACGAGCGCAACCCTTATCCTTTGTTGCCAGCGGTTCCGGCC  
GGAACTCAAAGGAGACTGCCAGTGATAAACTGGAGGAAGGTGGGGATGACGT  
CAAGTCATCATGGCCCTTACGAGTAGGGCTACACACGTGCTACAATGGCATATA  
AAAGAGAAGCGACCTCGCGAGAGCAAGCGGACCTCATAAAGTATGTCGTAGTCC  
GGATTGGAGTCTGCAACTCGACTCCATGAAGTCGGAATCGCTAGTAATCGTAGAT  
CAGAATGCTACGGTGAATACGTTCCCGGGCCTTGTACACACCGCCCGTACACCA  
TGGGAGTGGGTTGCAAAGAAGTAGGTAGCTTAACCTTCGGGAGGGCGCTTACC  
>SP222

CACATGCAAGTCGAGCGGTAACACAGGGAGCTTGCTCCTGGGTGACGAGCGGCG  
GACGGGTGAGTAATGTCTGGGAAACTGCCTGATGGAGGGGGATAACTACTGGAA  
ACGGTAGCTAATACCGCATAACGTCGCAAGACCAAAGAGGGGGACCTTCGGGCC  
TCTTGCCATCGGATGTGCCAGATGGGATTAGCTAGTAGGTGGGGTAACGGCTCA  
CCTAGGCGACGATCCCTAGCTGGTCTGAGAGGATGACCAGCCACACTGGA  
AGACACGGTCCAGACTCCTACGGGAGGCAGCAGTGGGGAATATTGCACAATGGG  
CGCAAGCCTGATGCAGCCATGCCGCGTGTATGAAGAAGGCCTTCGGGTTGTA  
GTACTTTCAGCGAGGAGGAAGGCATTAAGGTTAATAACCTTGGTGATTGACGTTA  
CTCGCAGAAGAAGCACCGGCTAACTCCGTGCCAGCAGCCGCGGTAATACGGAGG  
GTGCAAGCGTTAATCGGAATTACTGGGCGTAAAGCGCACGCAGGCGGTCTGTCA  
AGTCGGATGTGAAATCCCCGGGCTCAACCTGGGAACTGCATTGAAACTGGCAG  
GCTAGAGTCTTGTAGAGGGGGGTAGAATTCCAGGTGTAGCGGTGAAATGCGTAG  
AGATCTGGAGGAATACCGGTGGCGAAGGCGGCCCCCTGGACAAAGACTGACGCT  
CAGGTGCGAAAGCGTGGGGAGCAAACAGGATTAGATACCCTGGTAGTCCACGCC  
GTAAACGATGTCGATTTGGAGGTTGTTCCCTTGAGGAGTGGCTTCCGGAGCTAAC  
GCGTTAAATCGACCGCCTGGGGAGTACGGCCGCAAGGTTAAACTCAAATGAAT  
TGACGGGGGCCCGCACAAGCGGTGGAGCATGTGGTTTAATTCGATGCAACGCGA  
AGAACCTTACCTACTCTTGACATCCAGAGAACTTTCCAGAGATGGATTGGTGCCT  
TCGGGAACTCTGAGACAGGTGCTGCATGGCTGTCGTCAGCTCGTGTGTGAAATG  
TTGGGTTAAGTCCC GCAACGAGCGCAACCCTTATCCTTTGTTGCCAGCGGTTCCGG  
CCGGGAACTCAAAGGAGACTGCCAGTGATAAACTGGAGGAAGGTGGGGATGAC  
GTCAAGTCATCATGGCCCTTACGAGTAGGGCTACACACGTGCTACAATGGCATATA  
CAAAGAGAAGCGACCTCGCGAGAGCAAGCGGACCTCATAAAGTATGTCGTAGTC  
CGGATTGGAGTCTGCAACTCGACTCCATGAAGTCGGAATCGCTAGTAATCGTAGA  
TCAGAATGCTACGGTGAATACGTTCCCGGGCCTTGTACACACCGCCCGTACACCC  
ATGGGAGTGGGTTGCAAAGAAGTAGGTAGCTTAACCTTCGGGAGGGCGCT  
>P23

CATGCAAGTCGAGCGGTAACACAGGGAGCTTGCTCCTGGGTGACGAGCGGCGGA  
CGGGTGAGTAATGTCTGGGAAACTGCCCGATGGAGGGGGATAACTACTGGAAAC  
GGTAGCTAATACCGCATAACGTCGCAAGACCAAAGAGGGGGACCTTCGGGCCCTC

TTGCCATCGGATGTGCCAGATGGGATTAGCTAGTAGGTGGGGTAACGGCTCACC  
TAGGCGACGATCCCTAGCTGGTCTGAGAGGATGACCAGCCACACTGGAAGTGGAG  
ACACGGTCCAGACTCCTACGGGAGGCAGCAGTGGGGAATATTGCACAATGGGCGC  
CAAGCCTGATGCAGCCATGCCGCGTGTATGAAGAAGGCCTTCGGGTTGTAAAGTA  
CTTTCAGCGAGGAGGAAGGCATTAAGGTTAATAACCTTGGTGATTGACGTTACTC  
GCAGAAGAAGCACCGGCTAACTCCGTGCCAGCAGCCGCGGTAATACGGAGGGTG  
CAAGCGTTAATCGGAATTACTGGGCGTAAAGCGCACGCAGGCGGTCTGTCAAGT  
CGGATGTGAAATCCCCGGGCTCAACCTGGGAACTGCATTCGAAACTGGCAGGCT  
AGAGTCTTGTAGAGGGGGGTAGAATTCCAGGTGTAGCGGTGAAATGCGTAGAGA  
TCTGGAGGAATACCGGTGGCGAAGGCGGCCCCCTGGACAAAGACTGACGCTCAG  
GTGCGAAAGCGTGGGGAGCAAACAGGATTAGATACCCTGGTAGTCCACGCCGTA  
AACGATGTTCGATTTGGAGGTTGTTCCCTTGAGGAGTGGCTTCCGGAGCTAACGCG  
TTAAATCGACCGCCTGGGGAGTACGGCCGCAAGGTTAAACTCAAATGAATTGA  
CGGGGGCCCGCACAAAGCGGTGGAGCATGTGGTTTAATTTCGATGCAACGCGAAGA  
ACCTTACCTACTCTTGACATCCAGAGAACTTCCAGAGATGGATTGGTGCCTTCG  
GAACTCTGAGACAGGTGCTGCATGGCTGTTCGTCAGCTCGTGTGTTGTGAAATGTTG  
GGTTAAGTCCCGCAACGAGCGCAACCCTTATCCTTTGTTGCCAGCGGTTCCGGCCG  
GAACTCAAAGGAGACTGCCAGTGATAAACTGGAGGAAGGTGGGGATGACGTC  
AAGTCATCATGGCCCTTACGAGTAGGGCTACACACGTGCTACAATGGCATATACA  
AAGAGAAGCGACCTCGCGAGAGCAAGCGGACCTCATAAAGTATGTCGTAGTCCG  
GATTGGAGTCTGCAACTCGACTCCATGAAGTCGGAATCGCTAGTAATCGTAGATC  
AGAATGCTACGGTGAATACGTTCCCGGGCCTTGTACACACCGCCCGTCACACCAT  
GGGAGTGGGTTGCAAAAAGAAGTAGGTAGCTTAACTTCGGGAGGGGCGCT

>P251

CATGCAAGTCGAGCGGTAACACAGGGAGCTTGCTCCTGGGTGACGAGCGGCGGA  
CGGGTGAGTAATGTCTGGGAAACTGCCCGATGGAGGGGGATAACTACTGGA AAC  
GGTAGCTAATACCGCATAATGTCGCAAGACCAAAGAGGGGGACCTTCGGGCCTCT  
TGCCATCGGATGTGCCAGATGGGATTAGCTAGTAGGTGGGGTAACGGCTCACCT  
AGGCGACGATCCCTAGCTGGTCTGAGAGGATGACCAGCCACACTGGAAGTGGAG  
CACGGTCCAGACTCCTACGGGAGGCAGCAGTGGGGAATATTGCACAATGGGCGC  
AAGCCTGATGCAGCCATGCCGCGTGTATGAAGAAGGCCTTCGGGTTGTAAAGTAC  
TTTCAGCGAGGAGGAAGGCATTAAGGTTAATAACCTTGGTGATTGACGTTACTCG  
CAGAAGAAGCACCGGCTAACTCCGTGCCAGCAGCCGCGGTAATACGGAGGGTGC  
AAGCGTTAATCGGAATTACTGGGCGTAAAGCGCACGCAGGCGGTCTGTCAAGTC  
GGATGTGAAATCCCCGGGCTCAACCTGGGAACTGCATTCGAAACTGGCAGGCTA  
GAGTCTTGTAGAGGGGGGTAGAATTCCAGGTGTAGCGGTGAAATGCGTAGAGAT  
CTGGAGGAATACCGGTGGCGAAGGCGGCCCCCTGGACAAAGACTGACGCTCAG  
GTGCGAAAGCGTGGGGAGCAAACAGGATTAGATACCCTGGTAGTCCACGCCGTA  
AACGATGTTCGATTTGGAGGTTGTTCCCTTGAGGAGTGGCTTCCGGAGCTAACGCG  
TTAAATCGACCGCCTGGGGAGTACGGCCGCAAGGTTAAACTCAAATGAATTGA  
CGGGGGCCCGCACAAAGCGGTGGAGCATGTGGTTTAATTTCGATGCAACGCGAAGA  
ACCTTACCTACTCTTGACATCCAGAGAACTTCCAGAGATGGATTGGTGCCTTCG  
GAACTCTGAGACAGGTGCTGCATGGCTGTTCGTCAGCTCGTGTGTTGTGAAATGTTG  
GGTTAAGTCCCGCAACGAGCGCAACCCTTATCCTTTGTTGCCAGCGGTTCCGGCCG

GGAACTCAAAGGAGACTGCCAGTGATAAACTGGAGGAAGGTGGGGATGACGTC  
AAGTCATCATGGCCCTTACGAGTAGGGCTACACACGTGCTACAATGGCATATACA  
AAGAGAAGCGACCTCGCGAGAGCAAGCGGACCTCATAAAGTATGTCGTAGTCCG  
GATTGGAGTCTGCAACTCGACTCCATGAAGTCGGAATCGCTAGTAATCGTAGATC  
AGAATGCTACGGTGAATACGTTCCCGGGCCTTGTACACACCGCCCGTCACACCAT  
GGGAGTGGGTTGCAAAAAGAAGTAGGTAGCTTAACTTTCGGGAGGGGCGCTTACC

>S261

ACATGCAAGTCGAGCGGTAACACAGGGAGCTTGCTCCTGGGTGACGAGCGGCGG  
ACGGGTGAGTAATGTCTGGGAAACTGCCCGATGGAGGGGGATAACTACTGGAAA  
CGGTAGCTAATACCGCATAATGTCGCAAGACCAAAGAGGGGGACCTTCGGGCCT  
CTTGCCATCGGATGTGCCAGATGGGATTAGCTAGTAGGTGGGGTAACGGCTCAC  
CTAGGCGACGATCCCTAGCTGGTCTGAGAGGATGACCAGCCACACTGGAAGTGA  
GACACGGTCCAGACTCCTACGGGAGGCAGCAGTGGGGAATATTGCACAATGGGC  
GCAAGCCTGATGCAGCCATGCCGCGTGTATGAAGAAGGCCTTCGGGTTGTAAAGT  
ACTTTCAGCGAGGAGGAAGGCATTAAGGTTAATAACCTTGGTGATTGACGTTACT  
CGCAGAAGAAGCACCGGCTAACTCCGTGCCAGCAGCCGCGGTAATACGGAGGGT  
GCAAGCGTTAATCGGAATTACTGGGCGTAAAGCGCACGCAGGCGGTCTGTCAAG  
TCGGATGTGAAATCCCCGGGCTCAACCTGGGAACTGCATTCGAAACTGGCAGGC  
TAGAGTCTTGTAGAGGGGGGTAGAATTCCAGGTGTAGCGGTGAAATGCGTAGAG  
ATCTGGAGGAATACCGGTGGCGAAGGCGGCCCCCTGGACAAAGACTGACGCTCA  
GGTGCGAAAGCGTGGGGAGCAAACAGGATTAGATACCCTGGTAGTCCACGCCGT  
AAACGATGTCGATTTGGAGGTTGTTCCCTTGAGGAGTGGCTTCCGGAGCTAACGC  
GTAAATCGACCGCCTGGGGAGTACGGCCGCAAGGTTAAACTCAAATGAATTG  
ACGGGGGCCCGCACAAGCGGTGGAGCATGTGGTTTAATTCGATGCAACGCGAAG  
AACCTTACCTACTCTTGACATCCAGAGAACTTCCAGAGATGGATTGGTGCCTTC  
GGAACTCTGAGACAGGTGCTGCATGGCTGTCGTCAGCTCGTGTTGTGAAATGTT  
GGGTTAAGTCCCACAACGAGCGCAACCCTTATCCTTTGTTGCCAGCGGTTTCGGCC  
GGGAACTCAAAGGAGACTGCCAGTGATAAACTGGAGGAAGGTGGGGATGACGT  
CAAGTCATCATGGCCCTTACGAGTAGGGCTACACACGTGCTACAATGGCATATAC  
AAAGAGAAGCGACCTCGCGAGAGCAAGCGGACCTCATAAAGTATGTCGTAGTCC  
GGATTGGAGTCTGCAACTCGACTCCATGAAGTCGGAATCGCTAGTAATCGTAGAT  
CAGAATGCTACGGTGAATACGTTCCCGGGCCTTGTACACACCGCCCGTCACACCA  
TGGGAGTGGGTTGCAAAAAGAAGTAGGTAGCTTAACTTTCGGGAGGGGCGCTTACC

>P28

CATGCAAGTCGAGCGGTAACACAGGGAGCTTGCTCCTGGGTGACGAGCGGCGGA  
CGGGTGAGTAATGTCTGGGAAACTGCCTGATGGAGGGGGATAACTACTGGAAAC  
GGTAGCTAATACCGCATAATGTCGCAAGACCAAAGAGGGGGACCTTCGGGCCTCT  
TGCCATCGGATGTGCCAGATGGGATTAGCTAGTAGGTGGGGTAACGGCTCACCT  
AGGCGACGATCCCTAGCTGGTCTGAGAGGATGACCAGCCACACTGGAAGTGA  
CACGGTCCAGACTCCTACGGGAGGCAGCAGTGGGGAATATTGCACAATGGGCGC  
AAGCCTGATGCAGCCATGCCGCGTGTATGAAGAAGGCCTTCGGGTTGTAAAGTAC  
TTCAGCGAGGAGGAAGGCATTAAGGTTAATAACCTTGGTGATTGACGTTACTCG  
CAGAAGAAGCACCGGCTAACTCCGTGCCAGCAGCCGCGGTAATACGGAGGGTGC  
AAGCGTTAATCGGAATTACTGGGCGTAAAGCGCACGCAGGCGGTCTGTCAAGTC

GGATGTGAAATCCCCGGGCTCAACCTGGGAACTGCATTCGAAACTGGCAGGCTA  
GAGTCTTGTAGAGGGGGGTAGAATTCCAGGTGTAGCGGTGAAATGCGTAGAGAT  
CTGGAGGAATACCGGTGGCGAAGGCGGCCCCCTGGACAAAGACTGACGCTCAG  
GTGCGAAAGCGTGGGGAGCAAACAGGATTAGATACCCTGGTAGTCCACGCCGTA  
AACGATGTTCGATTTGGAGGTTGTTCCCTTGAGGAGTGGCTTCCGGAGCTAACGCG  
TTAAATCGACCGCCTGGGGAGTACGGCCGCAAGGTTAAACTCAAATGAATTGA  
CGGGGGCCCGCACAAAGCGGTGGAGCATGTGGTTTAATTCGATGCAACGCGAAGA  
ACCTTACCTACTCTTGACATCCAGAGAACTTCCAGAGATGGATTGGTGCCTTCG  
GAACTCTGAGACAGGTGCTGCATGGCTGTTCGTCAGCTCGTGTTGTGAAATGTTG  
GGTTAAGTCCCGCAACGAGCGCAACCCTTATCCTTTGTTGCCAGCGGTTCCGGCCG  
GAACTCAAAGGAGACTGCCAGTGATAAACTGGAGGAAGGTGGGGATGACGTC  
AAGTCATCATGGCCCTTACGAGTAGGGCTACACACGTGCTACAATGGCATATACA  
AAGAGAAGCGACCTCGCGAGAGCAAGCGGACCTCATAAAGTATGTCGTAGTCCG  
GATTGGAGTCTGCAACTCGACTCCATGAAGTCGGAATCGCTAGTAATCGTAGATC  
AGAATGCTACGGTGAATACGTTCCCGGGCCTTGTACACACCGCCCGTCACACCAT  
GGGAGTGGGTTGCAAAAGAAGTAGGTAGCTTAACTTCGGGAGGGGCGCT

>P29

CATGCAAGTCGAGCGGTAACACAGGGAGCTTGCTCCTGGGTGACGAGCGGCGGA  
CGGGTGAGTAATGTCTGGGAACTGCCCGATGGAGGGGGATAACTACTGGAAAC  
GGTAGCTAATACCGCATAACGTTCGCAAGACCAAGAGGGGGACCTTCGGGCCCTC  
TTGCCATCGGATGTGCCAGATGGGATTAGCTAGTAGGTGGGGTAACGGCTCACC  
TAGGCGACGATCCCTAGCTGGTCTGAGAGGATGACCAGCCACACTGGAAGTGGAG  
ACACGGTCCAGACTCCTACGGGAGGCAGCAGTGGGGAAATATTGCACAATGGGCG  
CAAGCCTGATGCAGCCATGCCGCGTGTATGAAGAAGGCCTTCGGGTTGTAAAGTA  
CTTTCAGCGAGGAGGAAGGCATTAAGGTTAATAACCTTGGTGATTGACGTTACTC  
GCAGAAGAAGCACCGGCTAACTCCGTGCCAGCAGCCGCGGTAATACGGAGGGTG  
CAAGCGTTAATCGGAATTAAGTGGGCGTAAAGCGCACGCAGGCGGTCTGTCAAGT  
CGGATGTGAAATCCCCGGGCTCAACCTGGGAACTGCATTCGAAACTGGCAGGCT  
AGAGTCTTGTAGAGGGGGGTAGAATTCCAGGTGTAGCGGTGAAATGCGTAGAGA  
TCTGGAGGAATACCGGTGGCGAAGGCGGCCCCCTGGACAAAGACTGACGCTCAG  
GTGCGAAAGCGTGGGGAGCAAACAGGATTAGATACCCTGGTAGTCCACGCCGTA  
AACGATGTTCGATTTGGAGGTTGTTCCCTTGAGGAGTGGCTTCCGGAGCTAACGCG  
TTAAATCGACCGCCTGGGGAGTACGGCCGCAAGGTTAAACTCAAATGAATTGA  
CGGGGGCCCGCACAAAGCGGTGGAGCATGTGGTTTAATTCGATGCAACGCGAAGA  
ACCTTACCTACTCTTGACATCCAGAGAACTTCCAGAGATGGATTGGTGCCTTCG  
GAACTCTGAGACAGGTGCTGCATGGCTGTTCGTCAGCTCGTGTTGTGAAATGTTG  
GGTTAAGTCCCGCAACGAGCGCAACCCTTATCCTTTGTTGCCAGCGGTTCCGGCCG  
GAACTCAAAGGAGACTGCCAGTGATAAACTGGAGGAAGGTGGGGATGACGTC  
AAGTCATCATGGCCCTTACGAGTAGGGCTACACACGTGCTACAATGGCATATACA  
AAGAGAAGCGACCTCGCGAGAGCAAGCGGACCTCATAAAGTATGTCGTAGTCCG  
GATTGGAGTCTGCAACTCGACTCCATGAAGTCGGAATCGCTAGTAATCGTAGATC  
AGAATGCTACGGTGAATACGTTCCCGGGCCTTGTACACACCGCCCGTCACACCAT  
GGGAGTGGGTTGCAAAAGAAGTAGGTAGCTTAACTTCGGGAGGGGCGCTTAC

>S210

CACATGCAAGTCGAGCGGTAACACAGGGAGCTTGCTCCTGGGTGACGAGCGGCG  
GACGGGTGAGTAATGTCTGGGAAACTGCCTGATGGAGGGGGATAACTACTGGAA  
ACGGTAGCTAATACCGCATAATGTCGCAAGACCAAAGAGGGGGACCTTCGGGCC  
TCTTGCCATCGGATGTGCCAGATGGGATTAGCTAGTAGGTGGGGTAACGGCTCA  
CCTAGGCGACGATCCCTAGCTGGTCTGAGAGGATGACCAGCCACACTGGAAGT  
AGACACGGTCCAGACTCCTACGGGAGGCAGCAGTGGGGAATATTGCACAATGGG  
CGCAAGCCTGATGCAGCCATGCCGCGTGTATGAAGAAGGCCTTCGGGTTGTA  
GTAACCTTTCAGCGAGGAGGAAGGCATTAAGGTTAATAACCTTGGTGATTGACGTTA  
CTCGCAGAAGAAGCACCGGCTAACTCCGTGCCAGCAGCCGCGGTAATACGGAGG  
GTGCAAGCGTTAATCGGAATTACTGGGCGTAAAGCGCACGCAGGCGGTCTGTCA  
AGTCGGATGTGAAATCCCCGGGCTCAACCTGGGAACTGCATTCGAAACTGGCAG  
GCTAGAGTCTTGTAGAGGGGGGTAGAATTCCAGGTGTAGCGGTGAAATGCGTAG  
AGATCTGGAGGAATACCGGTGGCGAAGGCGGCCCTGGACAAAGACTGACGCT  
CAGGTGCGAAAGCGTGGGGAGCAAACAGGATTAGATACCCTGGTAGTCCACGCC  
GTAAACGATGTTCGATTTGGAGGTTGTTCCCTTGAGGAGTGGCTTCCGGAGCTAAC  
GCGTTAAATCGACCGCCTGGGGAGTACGGCCGCAAGGTTAAACTCAAATGAAT  
TGACGGGGGCCCCGCACAAGCGGTGGAGCATGTGGTTTAATTCGATGCAACGCGA  
AGAACCTTACCTACTCTTGACATCCAGAGAACTTCCAGAGATGGATTGGTGCCT  
TCGGGAACTCTGAGACAGGTGCTGCATGGCTGTCGTCAGCTCGTGTTGTGAAATG  
TTGGGTTAAGTCCCGCAACGAGCGCAACCCTTATCCTTTGTTGCCAGCGGTTCCGG  
CCGGGAACTCAAAGGAGACTGCCAGTGATAAACTGGAGGAAGGTGGGGATGAC  
GTCAAGTCATCATGGCCCTTACGAGTAGGGCTACACACGTGCTACAATGGCATATA  
CAAAGAGAAGCGACCTCGCGAGAGCAAGCGGACCTCATAAAGTATGTCGTAGTC  
CGGATTGGAGTCTGCAACTCGACTCCATGAAGTCGGAATCGCTAGTAATCGTAGA  
TCAGAATGCTACGGTGAATACGTTCCCGGGCCTTGTACACACCGCCCGTACACCC  
ATGGGAGTGGGTTGCAAAAGAAGTAGGTAGCTTAACCTTCGGGAGGGCGC

>S211

ACATGCAAGTCGAGCGGTAACACAGGGAGCTTGCTCCTGGGTGACGAGCGGCGG  
ACGGGTGAGTAATGTCTGGGAAACTGCCTGATGGAGGGGGATAACTACTGGAAA  
CGGTAGCTAATACCGCATAACGTCGCAAGACCAAAGAGGGGGACCTTCGGGCCCT  
CTTGCCATCGGATGTGCCAGATGGGATTAGCTAGTAGGTGGGGTAACGGCTCAC  
CTAGGCGACGATCCCTAGCTGGTCTGAGAGGATGACCAGCCACACTGGAAGTGA  
GACACGGTCCAGACTCCTACGGGAGGCAGCAGTGGGGAATATTGCACAATGGGC  
GCAAGCCTGATGCAGCCATGCCGCGTGTATGAAGAAGGCCTTCGGGTTGTAAGT  
ACTTTCAGCGAGGAGGAAGGCATTAAGGTTAATAACCTTGGTGATTGACGTTACT  
CGCAGAAGAAGCACCGGCTAACTCCGTGCCAGCAGCCGCGGTAATACGGAGGGT  
GCAAGCGTTAATCGGAATTACTGGGCGTAAAGCGCACGCAGGCGGTCTGTCAAG  
TCGGATGTGAAATCCCCGGGCTCAACCTGGGAACTGCATTCGAAACTGGCAGGC  
TAGAGTCTTGTAGAGGGGGGTAGAATTCCAGGTGTAGCGGTGAAATGCGTAGAG  
ATCTGGAGGAATACCGGTGGCGAAGGCGGCCCTGGACAAAGACTGACGCTCA  
GGTGCGAAAGCGTGGGGAGCAAACAGGATTAGATACCCTGGTAGTCCACGCCGT  
AAACGATGTTCGATTTGGAGGTTGTTCCCTTGAGGAGTGGCTTCCGGAGCTAACGC  
GTTAAATCGACCGCCTGGGGAGTACGGCCGCAAGGTTAAACTCAAATGAATTG  
ACGGGGGCCCCGCACAAGCGGTGGAGCATGTGGTTTAATTCGATGCAACGCGAAG



AACCTTACCTACTCTTGACATCCAGAGAACTTTCCAGAGATGGATTGGTGCCTTC  
GGAACTCTGAGACAGGTGCTGCATGGCTGTCGTCAGCTCGTGTGTTGTGAAATGTT  
GGTTAAGTCCCACAACGAGCGCAACCCTTATCCTTTGTTGCCAGCGGTTTCGGCC  
GGAACTCAAAGGAGACTGCCAGTGATAAACTGGAGGAAGGTGGGGATGACGT  
CAAGTCATCATGGCCCTTACGAGTAGGGCTACACACGTGCTACAATGGCATATAC  
AAAGAGAAGCGACCTCGCGAGAGCAAGCGGACCTCATAAAGTATGTCGTAGTCC  
GGATTGGAGTCTGCAACTCGACTCCATGAAGTCGGAATCGCTAGTAATCGTAGAT  
CAGAATGCTACGGTGAATACGTTCCCGGGCCTTGTACACACCCGCCCGTCACACCA  
TGGGAGTGGGTTGCAAAAGAAGTAGGTAGCTTAACCTTCGGGAGGGCGCT

>S312

CATGCAAGTCGAGCGGTAACACAGGGAGCTTGCTCCTGGGTGACGAGCGGCGGA  
CGGGTGAGTAATGTCTGGGAACTGCCCGATGGAGGGGGATAACTACTGGAAC  
GGTAGCTAATACCGCATAATGTCGCAAGACCAAGAGGGGGACCTTCGGGCCTCT  
TGCCATCGGATGTGCCAGATGGGATTAGCTAGTAGGTGGGGTAACGGCTCACCT  
AGGCGACGATCCCTAGCTGGTCTGAGAGGATGACCAGCCACACTGGAAGTGA  
CACGGTCCAGACTCCTACGGGAGGCAGCAGTGGGGAATATTGCACAATGGGCGC  
AAGCCTGATGCAGCCATGCCGCGTGTATGAAGAAGGCCTTCGGGTTGTAAAGTAC  
TTTCAGCGAGGAGGAAGGCATTAAGGTTAATAACCTTGGTGATTGACGTTACTCG  
CAGAAGAAGCACCGGCTAACTCCGTGCCAGCAGCCGCGTAATACGGAGGGTGC  
AAGCGTTAATCGGAATTACTGGGCGTAAAGCGCACGCAGGCGGTCTGTCAAGTC  
GGATGTGAAATCCCCGGGCTCAACCTGGGAACTGCATTGAAACTGGCAGGCTA  
GAGTCTTGTAGAGGGGGGTAGAATTCCAGGTGTAGCGGTGAAATGCGTAGAGAT  
CTGGAGGAATACCGGTGGCGAAGGCGGCCCTGGACAAAGACTGACGCTCAG  
GTGCGAAAGCGTGGGGAGCAAACAGGATTAGATACCCTGGTAGTCCACGCCGTA  
AACGATGTGATTTGGAGGTTGTTCCCTTGAGGAGTGGCTTCCGGAGCTAACCGG  
TTAAATCGACCGCCTGGGGAGTACGGCCGCAAGGTTAAACTCAAATGAATTGA  
CGGGGGCCCGCACAAAGCGGTGGAGCATGTGGTTTAATTCGATGCAACGCGAAGA  
ACCTTACCTACTCTTGACATCCAGAGAACTTTCCAGAGATGGATTGGTGCCTTCG  
GAACTCTGAGACAGGTGCTGCATGGCTGTCGTCAGCTCGTGTGTTGTGAAATGTTG  
GGTTAAGTCCCACAACGAGCGCAACCCTTATCCTTTGTTGCCAGCGGTTTCGGCCG  
GAACTCAAAGGAGACTGCCAGTGATAAACTGGAGGAAGGTGGGGATGACGTC  
AAGTCATCATGGCCCTTACGAGTAGGGCTACACACGTGCTACAATGGCATATACA  
AAGAGAAGCGACCTCGCGAGAGCAAGCGGACCTCATAAAGTATGTCGTAGTCCG  
GATTGGAGTCTGCAACTCGACTCCATGAAGTCGGAATCGCTAGTAATCGTAGATC  
AGAATGCTACGGTGAATACGTTCCCGGGCCTTGTACACACCCGCCCGTCACACCAT  
GGGAGTGGGTTGCAAAAGAAGTAGGTAGCTTAACCTTCGGGAGGGCGCT

>S311

CATGCAAGTCGAACGGTAGCACAGAGAGCTTGCTCTCGGGTGACGAGTGGCGGA  
CGGGTGAGTAATGTCTGGGAACTGCCTGATGGAGGGGGATAACTACTGGAAC  
GGTAGCTAATACCGCATAACGTCGCAAGACCAAGAGGGGGACCTTCGGGCCTC  
TTGCCATCAGATGTGCCAGATGGGATTAGCTAGTAGGTGGGGTAACGGCTCACC  
TAGGCGACGATCCCTAGCTGGTCTGAGAGGATGACCAGCCACACTGGAAGTGA  
ACACGGTCCAGACTCCTACGGGAGGCAGCAGTGGGGAATATTGCACAATGGGCG  
CAAGCCTGATGCAGCCATGCCGCGTGTATGAAGAAGGCCTTCGGGTTGTAAAGTA

CTTTCAGCGGGGAGGAAGGTGTTGTGGTTAATAACCGCAGCAATTGACGTTACCC  
GCAGAAGAAGCACCGGCTAACTCCGTGCCAGCAGCCGCGGTAATACGGAGGGTG  
CAAGCGTTAATCGGAATTACTGGGCGTAAAGCGCACGCAGGCGGTCTGTCAAGT  
CGGATGTGAAATCCCCGGGCTCAACCTGGGAACTGCATTCGAAACTGGCAGGCT  
AGAGTCTTGTAGAGGGGGGTAGAATTCCAGGTGTAGCGGTGAAATGCGTAGAGA  
TCTGGAGGAATACCGGTGGCGAAGGCGGCCCCCTGGACAAAGACTGACGCTCAG  
GTGCGAAAGCGTGGGGAGCAAACAGGATTAGATACCCTGGTAGTCCACGCCGTA  
AACGATGTGACTTGGAGGTTGTGCCCTTGAGGCGTGGCTTCCGGAGCTAACGC  
GTTAAGTCGACCGCCTGGGGAGTACGGCCGCAAGGTTAAAACCTCAAATGAATTG  
ACGGGGGCCCGCACAAGCGGTGGAGCATGTGGTTTAATTCGATGCAACGCGAAG  
AACCTTACCTACTCTTGACATCCAGAGAACTTAGCAGAGATGCTTTGGTGCCTTC  
GGAACTCTGAGACAGGTGCTGCATGGCTGTCGTCAGCTCGTGTTGTGAAATGTT  
GGGTTAAGTCCCCGCAACGAGCGCAACCCCTTATCCTTTGTTGCCAGCGGTCAGGCC  
GGAACTCAAAGGAGACTGCCAGTGATAAACTGGAGGAAGGTGGGGATGACGT  
CAAGTCATCATGGCCCTTACGAGTAGGGCTACACACGTGCTACAATGGCGCATA  
AAAGAGAAGCGACCTCGCGAGAGCAAGCGGACCTCATAAAGTGCGTCTAGTCC  
GGATTGGAGTCTGCAACTCGACTCCATGAAGTCGGAATCGCTAGTAATCGTAGAT  
CAGAATGCTACGGTGAATACGTTCCCGGGCCTTGTACACACCGCCCGTCACACCA  
TGGGAGTGGGTTGCAAAAGAAGTAGGTAGCTTAACCTTCGGGAGGGCGCTTACC  
>S33

TGCAAGTCGAGCGGTAACACAGGGAGCTTGCTCCTGGGTGACGAGCGGCGGAC  
GGGTGAGTAATGTCTGGGAACTGCCTGATGGAGGGGGATAACTACTGGAAACG  
GTAGCTAATACCGCATAATGTCGCAAGACCAAAGAGGGGGACCTTCGGGCCTCTT  
GCCATCGGATGTGCCAGATGGGATTAGCTAGTAGGTGGGGTAACGGCTCACCTA  
GGCGACGATCCCTAGCTGGTCTGAGAGGATGACCAGCCACACTGGAAGTGGAGAC  
ACGGTCCAGACTCCTACGGGAGGCAGCAGTGGGGAATATTGCACAATGGGCGCA  
AGCCTGATGCAGCCATGCCGCGTGTATGAAGAAGGCCTTCGGGTTGTAAAGTACT  
TTCAGCGAGGAGGAAGGCATTAAGGTTAATAACCTTGGTGATTGACGTTACTCGC  
AGAAGAAGCACCGGCTAACTCCGTGCCAGCAGCCGCGGTAATACGGAGGGTGCA  
AGCGTTAATCGGAATTACTGGGCGTAAAGCGCACGCAGGCGGTCTGTCAAGTCG  
GATGTGAAATCCCCGGGCTCAACCTGGGAACTGCATTCGAAACTGGCAGGCTAG  
AGTCTTGTAGAGGGGGGTAGAATTCCAGGTGTAGCGGTGAAATGCGTAGAGATCT  
GGAGGAATACCGGTGGCGAAGGCGGCCCCCTGGACAAAGACTGACGCTCAGGT  
GCGAAAGCGTGGGGAGCAAACAGGATTAGATACCCTGGTAGTCCACGCCGTA  
CGATGTCGATTTGGAGGTTGTTCCCTTGAGGAGTGGCTTCCGGAGCTAACGCGTT  
AAATCGACCGCCTGGGGAGTACGGCCGCAAGGTTAAAACCTCAAATGAATTGACG  
GGGGCCCGCACAAGCGGTGGAGCATGTGGTTTAATTCGATGCAACGCGAAGA  
ACTTACCTACTCTTGACATCCAGAGAACTTTCCAGAGATGGATTGGTGCCTTCGGG  
AACTCTGAGACAGGTGCTGCATGGCTGTCGTCAGCTCGTGTTGTGAAATGTTGGG  
TTAAGTCCCCGCAACGAGCGCAACCCCTTATCCTTTGTTGCCAGCGGTTTCGGCCGGG  
AACTCAAAGGAGACTGCCAGTGATAAACTGGAGGAAGGTGGGGATGACGTCAA  
GTCATCATGGCCCTTACGAGTAGGGCTACACACGTGCTACAATGGCATATACAAA  
GAGAAGCGACCTCGCGAGAGCAAGCGGACCTCATAAAGTATGTCGTAGTCCGGA  
TTGGAGTCTGCAACTCGACTCCATGAAGTCGGAATCGCTAGTAATCGTAGATCAG

AATGCTACGGTGAATACGTTCCCGGGCCTTGTACACACCGCCCGTCACACCATGG  
GAGTGGGTTGCAAAAGAAGTAGGTAGCTTAACCTTCGGGAGGGCG

>S46

TGCAAGTCGAGCGGTAACACAGGGAGCTTGCTCCTGGGTGACGAGCGGCGGAC  
GGGTGAGTAATGTCTGGGAACTGCCTGATGGAGGGGGATAACTACTGGAAACG  
GTAGCTAATACCGCATAATGTCGCAAGACCAAAGAGGGGGACCTTCGGGCCTCTT  
GCCATCAGATGTGCCAGATGGGATTAGCTAGTAGGTGGGGTAATGGCTCACCTA  
GGCGACGATCCCTAGCTGGTCTGAGAGGATGACCAGCCACACTGGAAGTACTGAGAC  
ACGGTCCAGACTCCTACGGGAGGCAGCAGTGGGGAATATTGCACAATGGGCGCA  
AGCCTGATGCAGCCATGCCGCGTGTATGAAGAAGGCCTTCGGGTTGTAAAGTACT  
TTCAGCGAGGAGGAAGGCATTGAGGTTAATAACCTTGGTGATTGACGTTACTCGC  
AGAAGAAGCACCGGCTAACTCCGTGCCAGCAGCCGCGGTAATACGGAGGGTGCA  
AGCGTTAATCGGAATTACTGGGCGTAAAGCGCACGCAGGCGGTCTGTCAAGTCG  
GATGTGAAATCCCCGGGCTCAACCTGGGAACTGCATTTCGAAACTGGCAGGCTAG  
AGTCTTGTAGAGGGGGGTAGAATTCCAGGTGTAGCGGTGAAATGCGTAGAGATCT  
GGAGGAATACCGGTGGCGAAGGCGGCCCCCTGGACAAAGACTGACGCTCAGGT  
GCGAAAGCGTGGGGAGCAAACAGGATTAGATACCCTGGTAGTCCACGCCGTA  
CGATGTCGATTTGGAGGTTGTTCCCTTGAGGAGTGGCTTCCGGAGCTAACGCGTT  
AAATCGACCGCCTGGGGAGTACGGCCGCAAGGTTAAACTCAAATGAATTGACG  
GGGGCCCGCACAAGCGGTGGAGCATGTGGTTAATTCGATGCAACGCGAAGAAC  
CTTACCTACTCTTGACATCCAGAGAACTTTCCAGAGATGGATTGGTGCCTTCGGG  
AACTCTGAGACAGGTGCTGCATGGCTGTCGTCAGCTCGTGTGTGAAATGTTGGG  
TTAAGTCCCGCAACGAGCGCAACCCCTTATCCTTTGTTGCCAGCGGTCCGGCCGGG  
AACTCAAAGGAGACTGCCAGTGATAAACTGGAGGAAGGTGGGGATGACGTCAA  
GTCATCATGGCCCTTACGAGTAGGGCTACACACGTGCTACAATGGCATATACAAA  
GAGAAGCGACCTCGCGAGAGCAAGCGGACCTCATAAAGTATGTCGTAGTCCGGA  
TTGGAGTCTGCAACTCGACTCCATGAAGTCGGAATCGCTAGTAATCGTAGATCAG  
AATGCTACGGTGAATACGTTCCCGGGCCTTGTACACACCGCCCGTCACACCATGG  
GAGTGGGTTGCAAAAGAAGTAGGTAGCTTAACCTTCGGGAGGGC

>S429

CATGCAAGTCGAGCGGTAACACAGGGAGCTTGCTCCTGGGTGACGAGCGGCGGA  
CGGGTGAGTAATGTCTGGGAACTGCCCGATGGAGGGGGATAACTACTGGAAAC  
GGTAGCTAATACCGCATAACGTCGCAAGACCAAAGAGGGGGACCTTCGGGCCTC  
TTGCCATCGGATGTGCCAGATGGGATTAGCTAGTAGGTGGGGTAACGGCTCACC  
TAGGCGACGATCCCTAGCTGGTCTGAGAGGATGACCAGCCACACTGGAAGTACTGAG  
ACACGGTCCAGACTCCTACGGGAGGCAGCAGTGGGGAATATTGCACAATGGGCG  
CAAGCCTGATGCAGCCATGCCGCGTGTATGAAGAAGGCCTTCGGGTTGTAAAGTA  
CTTTCAGCGAGGAGGAAGGCATTAAGGTTAATAACCTTGGTGATTGACGTTACTC  
GCAGAAGAAGCACCGGCTAACTCCGTGCCAGCAGCCGCGGTAATACGGAGGGTG  
CAAGCGTTAATCGGAATTACTGGGCGTAAAGCGCACGCAGGCGGTCTGTCAAGT  
CGGATGTGAAATCCCCGGGCTCAACCTGGGAACTGCATTTCGAAACTGGCAGGCT  
AGAGTCTTGTAGAGGGGGGTAGAATTCCAGGTGTAGCGGTGAAATGCGTAGAGA  
TCTGGAGGAATACCGGTGGCGAAGGCGGCCCCCTGGACAAAGACTGACGCTCAG  
GTGCGAAAGCGTGGGGAGCAAACAGGATTAGATACCCTGGTAGTCCACGCCGTA

AACGATGTCGATTTGGAGGTTGTTCCCTTGAGGAGTGGCTTCCGGAGCTAACGCG  
TTAAATCGACCGCCTGGGGAGTACGGCCGCAAGGTTAAACTCAAATGAATTGA  
CGGGGGCCCCGCACAAGCGGTGGAGCATGTGGTTTAAATTCGATGCAACGCGAAGA  
ACCTTACCTACTCTTGACATCCAGAGAACTTAGCAGAGATGGATTGGTGCCTTCG  
GGA ACTCTGAGACAGGTGCTGCATGGCTGTCGTCAGCTCGTGTGTGAAATGTTG  
GGTTAAGTCCCGCAACGAGCGCAACCCTTATCCTTTGTTGCCAGCGGTTCCGGCCG  
GGA ACTCAAAGGAGACTGCCAGTGATAAACTGGAGGAAGGTGGGGATGACGTC  
AAGTCATCATGGCCCTTACGAGTAGGGCTACACACGTGCTACAATGGCATATACA  
AAGAGAAGCGACCTCGCGAGAGCAAGCGGACCTCATAAAGTATGTCGTAGTCCG  
GATTGGAGTCTGCAACTCGACTCCATGAAGTCGGAATCGCTAGTAATCGTAGATC  
AGAATGCTACGGTGAATACGTTCCCGGGCCTTGTACACACCGCCCGTCACACCAT  
GGGAGTGGGTTGCAAAAGAAGTAGGTAGCTTAACCTTCGGGAGGGC

>S51

CACATGCAAGTCGAACGGTAGCACAGAGAGCTTGCTCTCGGGTGACGAGTGGCG  
GACGGGTGAGTAATGTCTGGGAACTGCCTGATGGAGGGGGATAACTACTGGAA  
ACGGTAGCTAATACCGCATAACGTCGCAAGACCAAAGAGGGGGACCTTCGGGCC  
TCTTGCCATCAGATGTGCCAGATGGGATTAGCTAGTAGGTGGGGTAACGGCTCA  
CCTAGGCGACGATCCCTAGCTGGTCTGAGAGGATGACCAGCCACACTGGA ACTG  
AGACACGGTCCAGACTCCTACGGGAGGCAGCAGTGGGGAATATTGCACAATGGG  
CGAAGCCTGATGCAGCCATGCCGCGTGTATGAAGAAGGCCTTCGGGTTGTA  
GTA CT TTCAGCGGGGAGGAAGGTGTTGCGGTTAATAACCGCAGCAATTGACGTTA  
CCCGCAGAAGAAGCACCGGCTAACTCCGTGCCAGCAGCCGCGGTAATACGGAGG  
GTGCAAGCGTTAATCGGAATTACTGGGCGTAAAGCGCACGCAGGCGGTCTGTCA  
AGTCGGATGTGAAATCCCCGGGCTCAACCTGGGAACTGCATTTCGAAACTGGCAG  
GCTAGAGTCTTGTAGAGGGGGGTAGAATTCCAGGTGTAGCGGTGAAATGCGTAG  
AGATCTGGAGGAATACCGGTGGCGAAGGCGGCCCCCTGGACAAAGACTGACGCT  
CAGGTGCGAAAGCGTGGGGAGCAAACAGGATTAGATAACCCTGGTAGTCCACGCC  
GTAAACGATGTCGACTTGGAGGTTGTGCCCTTGAGGCGTGGCTTCCGGAGCTAAC  
GCGTTAAGTCGACCGCCTGGGGAGTACGGCCGCAAGGTTAAACTCAAATGAAT  
TGACGGGGGGCCCCGCACAAGCGGTGGAGCATGTGGTTTAAATTCGATGCAACGCGA  
AGA ACCTTACCTACTCTTGACATCCAGAGAACTTCCAGAGATGGATTGGTGCCT  
TCGGGAACTCTGAGACAGGTGCTGCATGGCTGTCGTCAGCTCGTGTGTGAAATG  
TTGGGTTAAGTCCCGCAACGAGCGCAACCCTTATCCTTTGTTGCCAGCGGTTCCGG  
CCGGGAACTCAAAGGAGACTGCCAGTGATAAACTGGAGGAAGGTGGGGATGAC  
GTCAAGTCATCATGGCCCTTACGAGTAGGGCTACACACGTGCTACAATGGCGCAT  
ACAAAGAGAAGCGAACTCGCGAGAGCAAGCGGACCTCATAAAGTGCCTCGTAG  
TCCGGATTGGAGTCTGCAACTCGACTCCATGAAGTCGGAATCGCTAGTAATCGTA  
GATCAGAATGCTACGGTGAATACGTTCCCGGGCCTTGTACACACCGCCCGTCACA  
CCATGGGAGTGGGTTGCAAAAGAAGTAGGTAGCTTAACCTTCGGGAGGGCGCTT  
ACC

>S522

CATGCAAGTCGAGCGGTAACACAGGGAGCTTGCTCCTGGGTGACGAGCGGCGGA  
CGGGTGAGTAATGTCTGGGAACTGCCTGATGGAGGGGGATAACTACTGGAAAC  
GGTAGCTAATACCGCATAATGTCGCAAGACCAAAGAGGGGGACCTTCGGGCCTCT

TGCCATCGGATGTGCCAGATGGGATTAGCTAGTAGGTGGGGTAACGGCTCACCT  
AGGCGACGATCCCTAGCTGGTCTGAGAGGATGACCAGCCACACTGGAAGTGA  
CACGGTCCAGACTCCTACGGGAGGCAGCAGTGGGGAATATTGCACAATGGGCGC  
AAGCCTGATGCAGCCATGCCGCGTGTATGAAGAAGGCCTTCGGGTTGTAAAGTAC  
TTTCAGCGAGGAGGAAGGCATTAAGGTTAATAACCTTGGTGATTGACGTTACTCG  
CAGAAGAAGCACCGGCTAACTCCGTGCCAGCAGCCGCGGTAATACGGAGGGTGC  
AAGCGTTAATCGGAATTACTGGGCGTAAAGCGCACGCAGGCGGTCTGTCAAGTC  
GGATGTGAAATCCCCGGGCTCAACCTGGGAACTGCATTGAAACTGGCAGGCTA  
GAGTCTTGTAGAGGGGGGTAGAATTCCAGGTGTAGCGGTGAAATGCGTAGAGAT  
CTGGAGGAATACCGGTGGCGAAGGCGGCCCTGGACAAAGACTGACGCTCAG  
GTGCGAAAGCGTGGGGAGCAAACAGGATTAGATACCCTGGTAGTCCACGCCGTA  
AACGATGTGATTTGGAGGTTGTTCCCTTGAGGAGTGGCTTCCGGAGCTAACGCG  
TTAAATCGACCGCCTGGGGAGTACGGCCGCAAGGTTAAACTCAAATGAATTGA  
CGGGGGCCCGCACAAAGCGGTGGAGCATGTGGTTTAATTCGATGCAACGCGAAGA  
ACCTTACCTACTCTTGACATCCAGAGAACTTCCAGAGATGGATTGGTGCCTTCG  
GAACTCTGAGACAGGTGCTGCATGGCTGTTCGTCAGCTCGTGTGTGAAATGTTG  
GGTTAAGTCCCGCAACGAGCGCAACCCTTATCCTTTGTTGCCAGCGGTTCCGGCCG  
GAACTCAAAGGAGACTGCCAGTGATAAACTGGAGGAAGGTGGGGATGACGTC  
AAGTCATCATGGCCCTTACGAGTAGGGCTACACACGTGCTACAATGGCATATACA  
AAGAGAAGCGACCTCGCGAGAGCAAGCGGACCTCATAAAGTATGTCGTAGTCCG  
GATTGGAGTCTGCAACTCGACTCCATGAAGTCGGAATCGCTAGTAATCGTAGATC  
AGAATGCTACGGTGAATACGTTCCCGGGCCTTGTACACACCGCCCGTCACACCAT  
GGGAGTGGGTTGCAAAAAGAAGTAGGTAGCTTAACTTCGGGAGGGGCGCTTACCA  
>P252

CATGCAAGTCGAGCGGTAGAGAGAAGCTTGCTTCTTTGAGAGCGGCGGACGGG  
TGAGTAATGCC TAGGAATCTGCCTGGTAGTGGGGGATAACGTTCCGAAACGGAC  
GCTAATACCGCATAACGTCCTACGGGAGAAAGCAGGGGACCTTCGGGCCTTGCCT  
ATCAGATGAGCCTAGGTGCGATTAGCTAGTTGGTGAGGTAATGGCTACCAAGGC  
GACGATCCGTA ACTGGTCTGAGAGGATGATCAGTCACACTGGAAGTGAAGACAG  
GTCCAGACTCCTACGGGAGGCAGCAGTGGGGAATATTGGACAATGGGCGAAAGC  
CTGATCCAGCCATGCCGCGTGTGTGAAGAAGGTCTTCGGATTGTAAAGCACTTTA  
AGTTGGGAGGAAGGGTTGTAGATTAATACTCTGCAATTTTGACGTTACCGACAGA  
ATAAGCACCGGCTAACTCTGTGCCAGCAGCCGCGGTAATACAGAGGGTGCAAGC  
GTTAATCGGAATTACTGGGCGTAAAGCGCGCGTAGGTGGTTTGTAAAGTTGGATG  
TGAAATCCCCGGGCTCAACCTGGGAACTGCATTCAA AACTGACTGACTAGAGTAT  
GGTAGAGGGTGGTGGAATTTCTGTGTAGCGGTGAAATGCGTAGATATAGGAAGG  
AACACCAGTGGCGAAGGCGACCACCTGGACTAATACTGACACTGAGGTGCGAAA  
GCGTGGGGAGCAAACAGGATTAGATACCCTGGTAGTCCACGCCGTA AACGATGT  
CAACTAGCCGTTGGAAGCCTTGAGCTTTTAGTGGCGCAGCTAACGCATTAAGTTG  
ACCGCCTGGGGAGTACGGCCGCAAGGTTAAACTCAAATGAATTGACGGGGGCC  
CGACAAGCGGTGGAGCATGTGGTTTAATTCGAAGCAACGCGAAGAACCTTACC  
AGGCCTTGACATCCAATGAACTTTCTAGAGATAGATTGGTGCCTTCGGGAACATT  
GAGACAGGTGCTGCATGGCTGTTCGTCAGCTCGTGTGCTGAGATGTTGGGTTAAGT  
CCCGTAACGAGCGCAACCCTTGTCTTAGTTACCAGCACGTTATGGTGGGCACTC

TAAGGAGACTGCCGGTGACAAACCGGAGGAAGGTGGGGATGACGTCAAGTCAT  
CATGGCCCTTACGGCCTGGGCTACACACGTGCTACAATGGTCGGTACAGAGGGTT  
GCCAAGCCGCGAGGTGGAGCTAATCCATAAAACCGATCGTAGTCCGGATCGCA  
GTCTGCAACTCGACTGCGTGAAGTCGGAATCGCTAGTAATCGCGAATCAGAATGT  
CGCGGTGAATACGTTCCCGGGCCTTGTACACACCGCCCGTCACACCATGGGAGTG  
GGTTGCACCAGAAGTAGCTAGTCTAACCTTCGGGAGGACGG

>S55

GTGGTACCGTCCTCCCGAGGTTAACTAGCTACTTCTGGTGCACCCACTCCCATGG  
TGTGACGGGCGGTGTGTACAAGGCCCGGAACGTATTCACCGCGACATTCTGATT  
CGCGATTACTAGCGATTCCGACTTCACGCAGTCGAGTTGCAGACTGCGATCCGGA  
CTACGATCGGTTTTGTGAGATTAGCTCCACCTCGCGGCTTGGCAACCCTCTGTACC  
GACCATTGTAGCACGTGTGTAGCCCAGGCCGTAAGGGCCATGATGACTTGACGTC  
ATCCCCACCTTCCTCCGGTTTTGTCACCGGCAGTCTCCTTAGAGTGCCCACCATAA  
CGTGCTGGTAACTAAGGACAAGGGTTGCGCTCGTTACGGGACTTAACCCAACATC  
TCACGACACGAGCTGACGACAGCCATGCAGCACCTGTGTCAGAGTTCCCGAAGG  
CACCAATCTATCTCTAGAAAGTTCTCTGCATGTCAAGGCCTGGTAAGGTTCTTCGC  
GTTGCTTCGAATTAACCACATGCTCCACCGCTTGTGCGGGCCCCCGTCAATTCAT  
TTGAGTTTTAACCTTGCGGCCGTACTCCCCAGGCGGTCAACTTAATGCGTTAGCT  
GCGCCACTAAAATCTCAAGGATTCCAACGGCTAGTTGACATCGTTTACGGCGTGG  
ACTACCAGGGTATCTAATCCTGTTTGTCTCCCCACGTTTTCGCACCTCAGTGTGAGT  
ATCAGTCCAGGTGGTCGCCTTCGCCACTGGTGTTTCTTCTATATCTACGCATTTT  
ACCGCTACACAGGAAATCCACCACCCTCTACCGTACTCTAGCTTGCCAGTTTTG  
GATGCAGTTCCAGGTTGAGCCCGGGGCTTTCACATCCAACTTAACAAACCACCT  
ACGCGCGCTTTACGCCCAGTAATTCCGATTAACGCTTGCACCCTCTGTATTACCGC  
GGCTGCTGGCACAGAGTTAGCCGGTGCTTATTCTGTCGGTAACGTCAAAACAGCA  
AGGTATTATCTTACTGCCCTTCTCCCAACTTAAAGTGCTTTACAATCCGAAGACC  
TTCTTCACACACGCGGCATGGCTGGATCAGGCTTTCGCCCATTTGTCCAATATCCC  
CACTGCTGCCTCCCGTAGGAGTCTGGACCGTGTCTCAGTTCCAGTGTGACTGATC  
ATCCTCTCAGACCAGTTACGGATCGTCGCCTTGGTGAGCCATTACCTCACCAACT  
AGCTAATCCGACCTAGGCTCATCTGATAGCGCAAGGCCCGAAGGTCCCCTGCTTT  
CTCCCGTAGGACGTATGCGGTATTAGCGTTCCTTTCGAAACGTTGTCCCCACTAC  
CAGGCAGATTCCTAGGCATTACTCACCCGTCCGCCGCTGAATCGAAGAGCAAGC

>S525

TGGTACCGTCCTCCCGAGGTTAGACTAGCTACTTCTGGTGCACCCACTCCCATGG  
TGTGACGGGCGGTGTGTACAAGGCCCGGAACGTATTCACCGCGACATTCTGATT  
CGCGATTACTAGCGATTCCGACTTCACGCAGTCGAGTTGCAGACTGCGATCCGGA  
CTACGATCGGTTTTGTGAGATTAGCTCCACCTCGCGGCTTGGCAACCCTCTGTACC  
GACCATTGTAGCACGTGTGTAGCCCAGGCCGTAAGGGCCATGATGACTTGACGTC  
ATCCCCACCTTCCTCCGGTTTTGTCACCGGCAGTCTCCTTAGAGTGCCCACCATAA  
CGTGCTGGTAACTAAGGACAAGGGTTGCGCTCGTTACGGGACTTAACCCAACATC  
TCACGACACGAGCTGACGACAGCCATGCAGCACCTGTGTCAGAGTTCCCGAAGG  
CACCAATCTATCTCTAGAAAGTTCTCTGCATGTCAAGGCCTGGTAAGGTTCTTCGC  
GTTGCTTCGAATTAACCACATGCTCCACCGCTTGTGCGGGCCCCCGTCAATTCAT  
TTGAGTTTTAACCTTGCGGCCGTACTCCCCAGGCGGTCAACTTAATGCGTTAGCT

GCGCCACTAAAATCTCAAGGATTCCAACGGCTAGTTGACATCGTTTACGGCGTGG  
ACTACCAGGGTATCTAATCCTGTTTGCTCCCCACGCTTTCGCACCTCAGTGTCACT  
ATCAGTCCAGGTGGTCGCCTTCGCCACTGGTGTTCCTTCTATATCTACGCATTC  
ACCGCTACACAGGAAATCCACCACCCTCTACCGTACTCTAGCTTGCCAGTTTTG  
GATGCAGTTCCAGGTTGAGCCCGGGGCTTTCACATCCAACCTAACAACACCT  
ACGCGCGCTTACGCCAGTAATCCGATTAACGCTTGCACCCTCTGTATTACCGC  
GGCTGCTGGCACAGAGTTAGCCGGTGCTTATTCTGTTCGGTAACGTCAAAACAGCA  
AGGTATTATCTTACTGCCCTTCTCCCAACTTAAAGTGCTTTACAATCCGAAGACC  
TTCTTCACACACGCGGCATGGCTGGATCAGGCTTTCGCCATTGTCCAATATCCC  
CACTGCTGCCTCCCGTAGGAGTCTGGACCGTGTCTCAGTTCAGTGTGACTGATC  
ATCCTCTCAGACCAGTTACGGATCGTCGCCTTGGTGAGCCATTACCTACCAACT  
AGCTAATCCGACCTAGGCTCATCTGATAGCGCAAGGCCCGAAGGTCCCCTGCTTT  
CTCCCGTAGGACGTATGCGGTATTAGCGTTCCTTTCGAAACGTTGTCCCCACTAC  
CAGGCAGATTCTAGGCATTACTCACCCGTCCGCCGCTGAATCGAAGAGCAAGC

>S12

GTGGTACCGTCCTCCCGAGGTAACTAGCTACTTCTGGTGCACCCACTCCCATGG  
TGTGACGGGCGGTGTGTACAAGGCCCGGAACGTATTCACCGCGACATTCTGATT  
CGCGATTACTAGCGATTCCGACTTCACGCAGTCGAGTTGCAGACTGCGATCCGGA  
CTACGATCGGTTTTGTGAGATTAGCTCCACCTCGCGGCTTGGCAACCCTCTGTACC  
GACCATTGTAGCACGTGTGTAGCCCAGGCCGTAAGGGCCATGATGACTTGACGTC  
ATCCCCACCTTCTCCGTTTTGTACCGGCAGTCTCCTTAGAGTGCCCACCATTAC  
GTGCTGGTAACTAAGGACAAGGGTTGCGCTCGTTACGGGACTTAACCCAACATCT  
CACGACACGAGCTGACGACAGCCATGCAGCACCTGTGTCAGAGTTCCCGAAGGC  
ACCAATCCATCTCTGGAAAGTTCTCTGCATGTCAAGGCCTGGTAAGGTTCTTCG  
GTTGCTTCGAATTAACACATGCTCCACCGCTTGTGCGGGCCCCCGTCAATTCAT  
TTGAGTTTTAACCTTGCGGCCGTACTCCCCAGGCCGTCAACTTAATGCGTTAGCT  
GCGCCACTAAAATCTCAAGGATTCCAACGGCTAGTTGACATCGTTTACGGCGTGG  
ACTACCAGGGTATCTAATCCTGTTTGCTCCCCACGCTTTCGCACCTCAGTGTCACT  
ATCAGTCCAGGTGGTCGCCTTCGCCACTGGTGTTCCTTCTATATCTACGCATTC  
ACCGCTACACAGGAAATCCACCACCCTCTACCGTACTCTAGCTTGCCAGTTTTG  
GATGCAGTTCCAGGTTGAGCCCGGGGCTTTCACATCCAACCTAACAACACCT  
ACGCGCGCTTACGCCAGTAATCCGATTAACGCTTGCACCCTCTGTATTACCGC  
GGCTGCTGGCACAGAGTTAGCCGGTGCTTATTCTGTTCGGTAACGTCAAAACAGCA  
AGGTATTAACCTTACTGCCCTTCTCCCAACTTAAAGTGCTTTACAATCCGAAGACC  
TTCTTCACACACGCGGCATGGCTGGATCAGGCTTTCGCCATTGTCCAATATCCC  
CACTGCTGCCTCCCGTAGGAGTCTGGACCGTGTCTCAGTTCAGTGTGACTGATC  
ATCCTCTCAGACCAGTTACGGATCGTCGCCTTGGTGAGCCATTACCCACCAACT  
AGCTAATCCGACCTAGGCTCATCTGATAGCGCAAGGCCCGAAGGTCCCCTGCTTT  
CTCCCGTAGGACGTATGCGGTATTAGCGTTCCTTTCGAAACGTTGTCCCCACTAC  
CAGGCAGATTCTAGGCATTACTCACCCGTCCGCCGCTGAATCAAGGAGCAAGCT  
CCCGT

>S410

CCGTCTCCCGAAGGTTAGACTAGCTACTTCTGGTGCACCCACTCCCATGGTGT  
GACGGGCGGTGTGTACAAGGCCCGGAACGTATTCACCGCGACATTCTGATTTCG

GATTACTAGCGATTCCGACTTCACGCAGTCGAGTTGCAGACTGCGATCCGGACTA  
CGATCGGTTTTGTGAGATTAGCTCCACCTCGCGGCTTGGCAACCCTCTGTACCGA  
CCATTGTAGCACGTGTGTAGCCCAGGCCGTAAGGGCCATGATGACTTGACGTCAT  
CCCCACCTTCTCCGGTTTTGTCACCGGCAGTCTCCTTAGAGTGCCACCATAACG  
TGCTGGTAACTAAGGACAAGGGTTGCGCTCGTTACGGGACTTAACCCAACATCTC  
ACGACACGAGCTGACGACAGCCATGCAGCACCTGTGTGTCAGAGTTCCCGAAGGCA  
CCAATCCATCTCTGGAAAGTTCTCTGCATGTCAAGGCCTGGTAAGGTTCTT  
CGCGTTGCTTTCGAATTAACCACATGCTCCACCGCTTGTGCGGGCCCCCGTCAAT  
TCATTTGAGTTTTAACCTTGCGGCCGTAATCCCCAGGCGGTCAACTTAATGCGTTA  
GCTGCGCCACTAAAATCTCAAGGATTCCAACGGCTAGTTGACATCGTTTACGGCG  
TGGACTACCAGGGTATCTAATCCTGTTTGTCTCCCCACGTTTTCGCACCTCAGTGTC  
AGTATCAGTCCAGGTGGTCGCCTTCGCCACTGGTGTTCTTCTATATCTACGCAT  
TTCACCGCTACACAGGAAATTCACCACCCTCTACCGTACTCTAGCTCGCCAGTT  
TTGGATGCAGTTCCAGGTTGAGCCCGGGGCTTTCACATCCAACCTTAACGAACCA  
CCTACGCGCGCTTTACGCCAGTAATTCCGATTAACGCTTGCACCCTCTGTATTAC  
CGCGGCTGCTGGCACAGAGTTAGCCGGTGCTTATTCTGTGCGTAACGTCAAAACA  
GCAAGGTATTAGCTTACTGCCCTTCTCCCAACTTAAAGTGCTTTACAATCCGAAG  
ACCTTCTTACACACGCGGCATGGCTGGATCAGGCTTTCGCCCATTTGTCCAATATT  
CCCCACTGCTGCCTCCCGTAGGAGTCTGGACCGTGTCTCAGTTCCAGTGTGACTG  
ATCATCCTCTCAGACCAGTTACGGATCGTCGCCTTGGTGAGCCATTACCCACCA  
ACTAGCTAATCCGACCTAGGCTCATCTGATAGCGCAAGGCCCGAAGGTCCCCTGC  
TTTCTCCCGTAGGACGTATGCGGTATTAGCGTTCCTTTCGAAACGTTGTCCCCAC  
TACCAGGCAGATTCCTAGGCATTAATCACCCGTCGCGCGCTGAATCAAGGAGCAA  
GCTCCCGTCATCCGCTCGACTTG

>S418

CCGTCTCCCGAAGGTTAGACTAGCTACTTCTGGTGCAACCCACTCCCATGGTGT  
GACGGGCGGTGTGTACAAGGCCCGGGAACGTATTACCGCGACATTCTGATTCG  
GATTACTAGCGATTCCGACTTCACGCAGTCGAGTTGCAGACTGCGATCCGGACTA  
CGATCGGTTTTGTGAGATTAGCTCCACCTCGCGGCTTGGCAACCCTCTGTACCGA  
CCATTGTAGCACGTGTGTAGCCCAGGCCGTAAGGGCCATGATGACTTGACGTCAT  
CCCCACCTTCTCCGGTTTTGTCACCGGCAGTCTCCTTAGAGTGCCACCATAACG  
TGCTGGTAACTAAGGACAAGGGTTGCGCTCGTTACGGGACTTAACCCAACATCTC  
ACGACACGAGCTGACGACAGCCATGCAGCACCTGTGTGTCAGAGTTCCCGAAGGCA  
CCAATCCATCTCTGGAAAGTTCTCTGCATGTCAAGGCCTGGTAAGGTTCTT  
CGCGTTGCTTTCGAATTAACCACATGCTCCACCGCTTGTGCGGGCCCCCGTCAAT  
TCATTTGAGTTTTAACCTTGCGGCCGTAATCCCCAGGCGGTCAACTTAATGCGTTA  
GCTGCGCCACTAAAATCTCAAGGATTCCAACGGCTAGTTGACATCGTTTACGGCG  
TGGACTACCAGGGTATCTAATCCTGTTTGTCTCCCCACGTTTTCGCACCTCAGTGTC  
AGTATCAGTCCAGGTGGTCGCCTTCGCCACTGGTGTTCTTCTATATCTACGCAT  
TTCACCGCTACACAGGAAATTCACCACCCTCTACCGTACTCTAGCTCGCCAGTT  
TTGGATGCAGTTCCAGGTTGAGCCCGGGGCTTTCACATCCAACCTTAACGAACCA  
CCTACGCGCGCTTTACGCCAGTAATTCCGATTAACGCTTGCACCCTCTGTATTAC  
CGCGGCTGCTGGCACAGAGTTAGCCGGTGCTTATTCTGTGCGTAACGTCAAAACA  
GCAAGGTATTAGCTTACTGCCCTTCTCCCAACTTAAAGTGCTTTACAATCCGAAG



ACCTTCTTCACACACGCGGCATGGCTGGATCAGGCTTTCGCCCATTGTCCAATATT  
CCCCACTGCTGCCTCCCGTAGGAGTCTGGACCGTGTCTCAGTTCCAGTGTGACTG  
ATCATCCTCTCAGACCAGTTACGGATCGTTCGCCTTGGTGAGCCATTACCTCACCAA  
CTAGCTAATCCGACCTAGGCTCATCTGATAGCGCAAGGCCCGAAGGTCCCCTGCT  
TTCTCCCGTAGGACGTATGCGGTATTAGCGTTCCTTTCGAAACGTTGTCCCCACT  
ACCAGGCAGATTCTTAGGCATTAATCAACCCGTCCGCCGCTGAATCAAGGAGCAAG  
CTCCCGTCATCCGCTCGACTT

>S272

GGTAACCGTCCTCCCGAAGGTTAGACTAGCTACTTCTGGTGCAACCCACTCCCAT  
GGTGTGACGGGCGGTGTGTACAAGGCCCGGGAACGTATTCACCGCGACATTCTG  
ATTCGCGATTACTAGCGATTCCGACTTCACGCAGTCGAGTTGCAGACTGCGATCC  
GGACTACGATCGGTTTTGTGAGATTAGCTCCACCTCGCGGCTTGGCAACCCTCTG  
TACCGACCATTGTAGCACGTGTGTAGCCCAGGCCGTAAGGGCCATGATGACTTGA  
CGTCATCCCCACCTTCTCCGGTTTGTACCCGGCAGTCTCCTTAGAGTGCCACC  
ATTACGTGCTGGTAACTAAGGACAAGGGTTGCGCTCGTTACGGGACTTAACCCAA  
CATCTCACGACACGAGCTGACGACAGCCATGCAGCACCTGTGTGACAGTTCCCG  
AAGGCACCAATCCATCTCTGGAAAGTTCTCTGCATGTCAAGGCCTGGTAAGGTTT  
TTCGCGTTGCTTCGAATTAACCATGCTCCACCGCTTGTGCGGGCCCCCGTCA  
ATTCATTTGAGTTTTAACCTTTCGCGCCGTACTCCCCAGGCGGTCAACTTAATGCGT  
TAGCTGCGCCACTAAAATCTCAAGGATCCAACGGCTAGTTGACATCGTTTACGG  
CGTGGACTACCAGGGTATCTAATCCTGTTTGTCCCCACGTTTTCGCACCTCAGTG  
TCAGTATCAGTCCAGGTGGTCGCCTTCGCCACTGGTGTTCCTTCTATATCTACGC  
ATTTACCCGCTACACAGGAAATTCACCACCTTCTACCGTACTCTAGCTTGCCAGT  
TTTGGATGCAGTTCCCAGGTTGAGCCCGGGGCTTTCACATCCAACCTAACAAACC  
ACCTACGCGCGCTTTACGCCAGTAATTCGGATTAACGCTTGCACCCTCTGTATTA  
CCGCGGCTGCTGGCACAGAGTTAGCCGGTGCTTATTCTGTGCGGTAACGTCAAAAC  
AGCAAGGTATTAACCTACTGCCCTTCTCCCAACTTAAAGTGCTTTACAATCCGAA  
GACCTTCTTCACACACGCGGCATGGCTGGATCAGGCTTTCGCCCATTGTCCAATAT  
TCCCCACTGCTGCCTCCCGTAGGAGTCTGGACCGTGTCTCAGTTCCAGTGTGACT  
GATCATCCTCTCAGACCAGTTACGGATCGTTCGCCTTGGTGAGCCATTACCCACC  
AACTAGCTAATCCGACCTAGGCTCATCTGATAGCGCAAGGCCCGAAGGTCCCCTG  
CTTTCTCCCGTAGGACGTATGCGGTATTAGCGTTCCTTTCGAAACGTTGTCCCCA  
CTACCAGGCAGATTCTTAGGCATTAATCAACCCGTCCGCCGCTGAATCAAGGAGCA  
AGCTCCCGTCATCCGCTCGACTTGCATG

>S53

GCGCCCTCCCGAAGGTTAAGCTACCTACTTCTTTTGCACCCACTCCCATGGTGTG  
ACGGGCGGTGTGTACAAGGCCCGGGAACGTATTCACCGTGGCATTCTGATCCACG  
ATTACTAGCGATTCCGACTTCATGGAGTCGAGTTGCAGACTCCAATCCGGACTAC  
GACGCACTTTATGAGGTCCGCTTGCTCTCGCGAGGTCGCTTCTCTTTGTATGCGCC  
ATTGTAGCACGTGTGTAGCCCTACTCGTAAGGGCCATGATGACTTGACGTATCCC  
CACCTTCTCCAGTTTATCACTGGCAGTCTCCTTTGAGTTCCCGGCCGGACCGCT  
GGCAACAAAGGATAAGGGTTGCGCTCGTTGCGGGACTTAACCCAACATTTACA  
ACACGAGCTGACGACAGCCATGCAGCACCTGTCTCAGAGTTCCCGAAGGCACCA  
AAGCATCTCTGCTAAGTTCTCTGGATGTCAAGAGTAGGTAAGGTTCTTCGCGTTG

CATCGAATTA AACACATGCTCCACCGCTTGTGCGGGCCCCCGTCAATTCATTTGA  
GTTTTAACCTTGC GGCCGTACTCCCCAGGCGGTCGACTTAACGCGTTAGCTCCGG  
AAGCCACGCCTCAAGGGCACAACCTCCAAGTCGACATCGTTTACGGCGTGGACT  
ACCAGGGTATCTAATCCTGTTTGTCTCCACGCTTTCGCACCTGAGCGTCAGTCTT  
TGTCCAGGGGGCCGCCTTCGCCACCGGTATTCCTCCAGATCTCTACGCATTCACC  
GCTACACCTGGAATTCACCCCCCTCTACAAGACTCTAGCCTGCCAGTTTCGAAT  
GCAGTCCCAGGTTGAGCCCCGGGATTTACATCCGACTTGACAGACCGCCTGC  
GTGCGCTTTACGCCCAGTAATTCGATTAACGCTTGACCCCTCCGTATTACCGCGG  
CTGCTGGCACGGAGTTAGCCGGTGCTTCTTCTGCGGGTAACGTCAATCGACAAGG  
TTATTAACCTTATCGCCTTCCTCCCCGCTGAAAGTACTTTACAACCCGAAGGCCTT  
CTTCATACACGCGGCATGGCTGCATCAGGCTTGCGCCATTGTGCAATATTCCECA  
CTGCTGCCTCCCGTAGGAGTCTGGACCGTGTCTCAGTTCCAGTGTGGCTGGTCAT  
CCTCTCAGACCAGCTAGGGATCGTCGCCTAGGTGAGCCGTTACCCACCTACTAG  
CTAATCCCATCTGGGCACATCCGATGGCAAGAGGCCCGAAGGTCCCCCTCTTTGG  
TCTTGCAGCGTTATGCGGTATTAGCTACCGTTTCCAGTAGTTATCCCCCTCCATCAG  
GCAGTTTCCAGACATTACTACCCCGTCCGCCACTCGTCAGCGAAGCAGCAAGC  
TGCTTCTGTAC

>P332

CATGCAAGTCGAACGGTAGCACAGAGAGCTTGCTCTCGGGTGACGAGTGGCGGA  
CGGGTGAGTAATGTCTGGGAAACTGCCTGATGGAGGGGGATAACTACTGGA AAC  
GGTAGCTAATACCGCATAACGTCGCAAGACCAAAGAGGGGGACCTTCGGGCCCTC  
TTGCCATCAGATGTGCCCAGATGGGATTAGCTAGTAGGTGGGGTAACGGCTCACC  
TAGGCGACGATCCCTAGCTGGTCTGAGAGGATGACCAGCCCACTGGA ACTGAG  
ACACGGTCCAGACTCCTACGGGAGGCAGCAGTGGGGAATATTGCACAATGGGCG  
CAAGCCTGATGCAGCCATGCCGCGTGTATGAAGAAGGCCTTCGGGTTGTAAAGTA  
CTTTCAGCGGGGAGGAAGGTGTTGTGGTTAATAACCGCAGCAATTGACGTTACCC  
GCAGAAGAAGCACCGGCTAACTCCGTGCCAGCAGCCGCGGTAATACGGAGGGTG  
CAAGCGTTAATCGGAATTA CTGGGCGTAAAGCGCACGCAGGCGGTCTGTCAAGT  
CGGATGTGAAATCCCCGGGCTCAACCTGGGAACTGCATTCGAAACTGGCAGGCT  
AGAGTCTTGTAGAGGGGGGTAGAATTCAGGTGTAGCGGTGAAATGCGTAGAGA  
TCTGGAGGAATACCGGTGGCGAAGGCGGCCCCCTGGACAAAGACTGACGCTCAG  
GTGCGAAAGCGTGGGGAGCAAACAGGATTAGATAACCCTGGTAGTCCACGCCGTA  
AACGATGTGCACTTGGAGGTTGTGCCCTTGAGGCGTGGCTTCCGGAGCTAACGC  
GTTAAGTCGACCGCCTGGGGAGTACGGCCGCAAGGTAAA ACTCAAATGAATTG  
ACGGGGGGCCCCGACAAGCGGTGGAGCATGTGGTTTAATTCGATGCAACGCGAAG  
AACCTTACCTACTCTTGACATCCAGAGAACTTAGCAGAGATGCTTTGGTGCCTTC  
GGAACTCTGAGACAGGTGCTGCATGGCTGTCTGTCAGCTCGTGTGTGAAATGTT  
GGGTTAAGTCCCGCAACGAGCGCAACCCCTTATCCTTTGTTGCCAGCGGTCAGGCC  
GGAACTCAAAGGAGACTGCCAGTGATAAACTGGAGGAAGGTGGGGATGACGT  
CAAGTCATCATGGCCCTTACGAGTAGGGCTACACACGTGCTACAATGGCGCATA  
AAAGAGAAGCGACCTCGCGAGAGCAAGCGGACCTCATAAAGTGCGTCTGATGTC  
GGATTGGAGTCTGCAACTCGACTCCATGAAGTCGGAATCGCTAGTAATCGTAGAT  
CAGAATGCTACGGTGAATACGTTCCCGGGCCTTGTTACACACCGCCCGTACACCA  
TGGGAGTGGGTTGCAAAAAGAAGTAGGTAGCTTAACCTTCGGGAGGGCGCT

>P242

ATGCAAGTCGAGCGGTAACACAGGGAGCTTGCTCCTGGGTGACGAGCGGCGGAC  
GGGTGAGTAATGTCTGGGAACTGCCTGATGGAGGGGGATAACTACTGGAAACG  
GTAGCTAATACCGCATAACGTCGCAAGACCAAAGAGGGGGACCTTCGGGCCTCT  
TGCCATCGGATGTGCCAGATGGGATTAGCTAGTAGGTGGGGTAACGGCTCACCT  
AGGCGACGATCCCTAGCTGGTCTGAGAGGATGACCAGCCACACTGGAAGTGAAGA  
CACGGTCCAGACTCCTACGGGAGGCAGCAGTGGGGAATATTGCACAATGGGCGC  
AAGCCTGATGCAGCCATGCCGCGTGTATGAAGAAGGCCTTCGGGTTGTAAAGTAC  
TTTCAGCGAGGAGGAAGGCATTAAGGTTAATAACCTTGGTGATTGACGTTACTCG  
CAGAAGAAGCACCGGCTAACTCCGTGCCAGCAGCCGCGGTAATACGGAGGGTGC  
AAGCGTTAATCGGAATTACTGGGCGTAAAGCGCACGCAGGCGGTCTGTCAAGTC  
GGATGTGAAATCCCCGGGCTCAACCTGGGAACTGCATTCGAAACTGGCAGGCTA  
GAGTCTTGTAGAGGGGGGTAGAATTCCAGGTGTAGCGGTGAAATGCGTAGAGAT  
CTGGAGGAATACCGGTGGCGAAGGCGGCCCCCTGGACAAAGACTGACGCTCAG  
GTGCGAAAGCGTGGGGAGCAAACAGGATTAGATACCCTGGTAGTCCACGCCGTA  
AACGATGTGATTTGGAGGTTGTTCCCTTGAGGAGTGGCTTCCGGAGCTAACGCG  
TTAAATCGACCGCCTGGGGAGTACGGCCGCAAGGTTAAAACTCAAATGAATTGA  
CGGGGGCCCCGCACAAGCGGTGGAGCATGTGGTTTAAATTCGATGCAACGCGAAGA  
ACCTTACCTACTCTTGACATCCAGAGAACTTCCAGAGATGGATTGGTGCCTTCG  
GGAAGTCTGAGACAGGTGCTGCATGGCTGTGCTCAGCTCGTGTGTGAAATGTTG  
GGTTAAGTCCCGCAACGAGCGCAACCCTTATCCTTTGTTGCCAGCGGTTCCGGCCG  
GGAAGTCAAAGGAGACTGCCAGTGATAAACTGGAGGAAGGTGGGGATGACGTC  
AAGTCATCATGGCCCTTACGAGTAGGGCTACACACGTGCTACAATGGCATATACA  
AAGAGAAGCGACCTCGCGAGAGCAAGCGGACCTCATAAAGTATGTCGTAGTCCG  
GATTGGAGTCTGCAACTCGACTCCATGAAGTCGGAATCGCTAGTAATCGTAGATC  
AGAATGCTACGGTGAATACGTTCCCGGGCCTTGTACACACCGCCCGTCACACCAT  
GGGAGTGGGTTGCAAAAGAAGTAGGTAGCTTAACTTCGGGAGGGGCGCT

>P272

AGCGCCCTCCCGAAGGTTAAGCTACCTACTTCTTTTGCAACCCACTCCCATGGTG  
TGACGGGCGGTGTGTACAAGGCCCGGGAACGTATTCACCGTAGCATTCTGATCTA  
CGATTACTAGCGATTCCGACTTCATGGAGTCGAGTTGCAGACTCCAATCCGGACT  
ACGACATACTTTATGAGGTCCGCTTGCTCTCGCGAGGTCGCTTCTCTTTGTATATG  
CCATTGTAGCACGTGTGTAGCCCTACTCGTAAGGGCCATGATGACTTGACGTCATC  
CCCACCTTCCTCCAGTTTATCACTGGCAGTCTCCTTTGAGTTCCCGGCCGAACCG  
CTGGCAACAAAGGATAAGGGTTGCGCTCGTTGCGGGACTTAACCCAACATTTAC  
AACACGAGCTGACGACAGCCATGCAGCACCTGTCTCAGAGTTCCCGAAGGCACC  
AATCCATCTCTGGAAAGTTCTCTGGATGTCAAGAGTAGGTAAGGTTCTTCGCGTT  
GCATCGAATTAACACATGCTCCACCGCTTGTGCGGGCCCCCGTCAATTCATTTG  
AGTTTTAACCTTGCGGCCGTAATCCCCAGGCGGTGATTTAACGCGTTAGCTCCG  
GAAGCCACTCCTCAAGGGAACAACCTCCAAATCGACATCGTTTACGGCGTGGAC  
TACCAGGGTATCTAATCCTGTTTGTCTCCCCACGCTTTCGCACCTGAGCGTCAGTCT  
TTGTCCAGGGGGCCGCTTCGCCACCGGTATTCTCCAGATCTCTACGCATTTAC  
CGCTACACCTGGAATTCTACCCCCCTTACAAGACTCTAGCCTGCCAGTTTCGAAT  
GCAGTTCCAGGTTGAGCCCGGGGATTTACATCCGACTTGACAGACCGCCTGC

GTGCGCTTTACGCCAGTAATTCCGATTAACGCTTGCACCCTCCGTATTACCGCGG  
CTGCTGGCACGGAGTTAGCCGGTGCTTCTTCTGCGAGTAACGTCAATCACCAAGG  
TTATTAACCTTAATGCCTTCCTCCTCGCTGAAAGTACTTTACAACCCGAAGGCCTT  
CTTCATACACGCGGCATGGCTGCATCAGGCTTGCGCCATTGTGCAATATTCCTCA  
CTGCTGCCTCCCGTAGGAGTCTGGACCGTGTCTCAGTTCCAGTGTGGCTGGTCAT  
CCTCTCAGACCAGCTAGGGATCGTCGCCTAGGTGAGCCGTTACCCACCTACTAG  
CTAATCCCATCTGGGCACATCCGATGGCAAGAGGCCCGAAGGTCCCCCTCTTTGG  
TCTTGCAGCGTTATGCGGTATTAGCTACCGTTTCCAGTAGTTATCCCCCTCCATCGG  
GCAGTTTCCCAGACATTACTACCCGTCCGCCGCTCGTCACCCAGGAGCAAGCTC  
CCTGTGTTACCGCTCGACTTGCA

>P212

GCAAGTCGAGCGGTAACACAGGGAGCTTGCTCCTGGGTGACGAGCGGCGGACG  
GGTGAGTAATGTCTGGGAAACTGCCCGATGGAGGGGGATAACTACTGGAAACGG  
TAGCTAATACCGCATAATGTCGAAGACCAAAGAGGGGGACCTTCGGGCCTCTTG  
CCATCGGATGTGCCCAGATGGGATTAGCTAGTAGGTGGGGTAACGGCTCACCTAG  
GCGACGATCCCTAGCTGGTCTGAGAGGATGACCAGCCACACTGGAAGTGGAGACA  
CGGTCCAGACTCCTACGGGAGGCAGCAGTGGGGAATATTGCACAATGGGCGCAA  
GCCTGATGCAGCCATGCCGCGTGTATGAAGAAGGCCTTCGGGTTGTAAAGTACTT  
TCAGCGAGGAGGAAGGCATTAAGGTTAATAACCTTGGTGATTGACGTTACTCGCA  
GAAGAAGCACCGGCTAACTCCGTGCCAGCAGCCGCGGTAATACGGAGGGTGCAA  
GCGTTAATCGGAATTACTGGGCGTAAAGCGCACGCAGGCGGTCTGTCAAGTCGG  
ATGTGAAATCCCCGGGCTCAACCTGGGAACTGCATTCGAAACTGGCAGGCTAGA  
GTCTTGTAGAGGGGGGTAGAATTCAGGTGTAGCGGTGAAATGCGTAGAGATCTG  
GAGGAATACCGGTGGCGAAGGCGGCCCTGGACAAAGACTGACGCTCAGGTG  
CGAAAGCGTGGGGAGCAAACAGGATTAGATACCCTGGTAGTCCACGCCGTAAAC  
GATGTCGATTTGGAGGTTGTTCCCTTGAGGAGTGGCTTCCGGAGCTAACGCGTTA  
AATCGACCGCCTGGGGAGTACGGCCGCAAGGTTAAAACCTCAAATGAATTGACGG  
GGGCCCGCACAAGCGGTGGAGCATGTGGTTTAAATTCGATGCAACGCGAAGAACC  
TTACCTACTCTTGACATCCAGAGAACTTTCAGAGATGGATTGGTGCCTTCGGGA  
ACTCTGAGACAGGTGCTGCATGGCTGTTCGTCAGCTCGTGTGTGAAATGTTGGGT  
TAAGTCCCGCAACGAGCGCAACCCTTATCCTTTGTTGCCAGCGGTTCCGGCCGGGA  
ACTCAAAGGAGACTGCCAGTGATAAACTGGAGGAAGGTGGGGATGACGTCAAG  
TCATCATGGCCCTTACGAGTAGGGCTACACACGTGCTACAATGGCATATACAAAG  
AGAAGCGACCTCGCGAGAGCAAGCGGACCTCATAAAGTATGTCGTAGTCCGGAT  
TGGAGTCTGCAACTCGACTCCATGAAGTCGGAATCGCTAGTAATCGTAGATCAGA  
ATGCTACGGTGAATACGTTCCCGGGCCTTGTACACACCGCCCGTCACACCATGGG  
AGTGGGTTGCAAAAGAAGTAGGTAGCTTAACCTTCGGGAGGGCGCT

>P21

CACATGCAAGTCGAGCGGTAGAGAGAAGCTTGCTTCTCTTGAGAGCGGCGGACG  
GGTGAGTAATGCCTAGGAATCTGCCTGGTAGTGGGGGATAACGTTCCGAAACGG  
ACGCTAATACCGCATACTCCTACGGGAGAAAGCAGGGGACCTTCGGGCCTTGC  
GCTATCAGATGAGCCTAGGTCCGATTAGCTAGTTGGTGAGGTAATGGCTCACCAA  
GGCGACGATCCGTAACCTGGTCTGAGAGGATGATCAGTCACACTGGAAGTGGAGAC  
ACGGTCCAGACTCCTACGGGAGGCAGCAGTGGGGAATATTGGACAATGGGCGAA

AGCCTGATCCAGCCATGCCGCGTGTGTGAAGAAGGTCTTCGGATTGTAAAGCACT  
TTAAGTTGGGAGGAAGGGTTGTAGATTAATACTCTGCAATTTTGACGTTACCGAC  
AGAATAAGCACCGGCTAACTCTGTGCCAGCAGCCGCGGTAATACAGAGGGTGCA  
AGCGTTAATCGGAATTACTGGGCGTAAAGCGCGCGTAGGTGGTTTGTAAAGTTGG  
ATGTGAAATCCCCGGGCTCAACCTGGGAACTGCATTCAAACTGACTGACTAGA  
GTATGGTAGAGGGTGGTGGAAATTCCTGTGTAGCGGTGAAATGCGTAGATATAGG  
AAGGAACACCAGTGGCGAAGGCGACCACCTGGACTAATACTGACACTGAGGTGC  
GAAAGCGTGGGGAGCAAACAGGATTAGATACCCTGGTAGTCCACGCCGTAAACG  
ATGTCAACTAGCCGTTGGAAGCCTTGAGCTTTTAGTGGCGCAGCTAACGCATTAA  
GTTGACCGCCTGGGGAGTACGGCCGCAAGGTTAAAACCTCAAATGAATTGACGGG  
GGCCCGCACAAAGCGGTGGAGCATGTGGTTTAATTCGAAGCAACGCGAAGAACCT  
TACCAGGCCTTGACATCCAATGAACTTTCTAGAGATAGATTGGTGCCTTCGGGAA  
CATTGAGACAGGTGCTGCATGGCTGTCGTCAGCTCGTGTCTGTGAGATGTTGGGTT  
AAGTCCCCTAACGAGCGCAACCCTTGTCTTAGTTACCAGCACGTTATGGTGGGC  
ACTCTAAGGAGACTGCCGGTGACAAACCGGAGGAAGGTGGGGATGACGTCAAG  
TCATCATGGCCCTTACGGCCTGGGCTACACACGTGCTACAATGGTCGGTACAGAG  
GGTTGCCAAGCCGCGAGGTGGAGCTAATCCATAAAACCGATCGTAGTCCGGATC  
GCAGTCTGCAACTCGACTGCGTGAAGTCGGAATCGTAGTAATCGCGAATCAGAA  
TGTCGCGGTGAATACGTTCCCGGGCCTTGTACACACCGCCCGTCACACCATGGGA  
GTGGGTTGCACCAGAAGTAGCTAGCTAACCTTCGGGAGGACGG

>S22

CATGCAAGTCGAGCGGTAGAGAGAAGCTTGCTTCTTGTGAGAGCGGCGGACGGG  
TGAGTAATGCC TAGGAATCTGCCTGGTAGTGGGGGATAACGTTCCGAAACGGAC  
GCTAATACCGCATAACGTCCTACGGGAGAAAGCAGGGGACCTTCGGGCCTTGCCT  
ATCAGATGAGCCTAGGTCTGGATTAGCTAGTTGGTGAGGTAATGGCTCACCAAGGC  
GACGATCCGTAACTGGTCTGAGAGGATGATCAGTCACACTGGAAGTGGAGACAG  
GTCCAGACTCCTACGGGAGGCAGCAGTGGGGAATATTGGACAATGGGCGAAAGC  
CTGATCCAGCCATGCCGCGTGTGTGAAGAAGGTCTTCGGATTGTAAAGCACTTTA  
AGTTGGGAGGAAGGGTTGTAGATTAATACTCTGCAATTTTGACGTTACCGACAGA  
ATAAGCACCGGCTAACTCTGTGCCAGCAGCCGCGGTAATACAGAGGGTGCAAGC  
GTTAATCGGAATTACTGGGCGTAAAGCGCGCGTAGGTGGTTTGTAAAGTTGGATG  
TGAAATCCCCGGGCTCAACCTGGGAACTGCATTCAAACTGACTGACTAGAGTAT  
GGTAGAGGGTGGTGGAAATTCCTGTGTAGCGGTGAAATGCGTAGATATAGGAAGG  
AACACCAGTGGCGAAGGCGACCACCTGGACTAATACTGACACTGAGGTGCGAAA  
GCGTGGGGAGCAAACAGGATTAGATACCCTGGTAGTCCACGCCGTAAACGATGT  
CAACTAGCCGTTGGAAGCCTTGAGCTTTTAGTGGCGCAGCTAACGCATTAAGTTG  
ACCGCCTGGGGAGTACGGCCGCAAGGTTAAAACCTCAAATGAATTGACGGGGGCC  
CGCACAAAGCGGTGGAGCATGTGGTTTAATTCGAAGCAACGCGAAGAACCTTACC  
AGGCCTTGACATCCAATGAACTTTCTAGAGATAGATTGGTGCCTTCGGGAACATT  
GAGACAGGTGCTGCATGGCTGTCGTCAGCTCGTGTCTGTGAGATGTTGGGTTAAGT  
CCCGTAACGAGCGCAACCCTTGTCTTAGTTACCAGCACGTTATGGTGGGCACTC  
TAAGGAGACTGCCGGTGACAAACCGGAGGAAGGTGGGGATGACGTCAAGTCAT  
CATGGCCCTTACGGCCTGGGCTACACACGTGCTACAATGGTCGGTACAGAGGGTT  
GCCAAGCCGCGAGGTGGAGCTAATCCATAAAACCGATCGTAGTCCGGATCGCA

GTCTGCAACTCGACTGCGTGAAGTCGGAATCGCTAGTAATCGCGAATCAGAATGT  
CGCGGTGAATACGTTCCCGGGCCTTGTACACACCGCCCGTCACACCATGGGAGTG  
GGTTGCACCAGAAGTAGCTAGTCTAACCTTCGGGAGGACGG

>P219

TGCAAGTCGAGCGGTAACACAGGGAGCTTGCTCCTGGGTGACGAGCGGCGGAC  
GGGTGAGTAATGTCTGGGAAACTGCCCGATGGAGGGGGATAACTACTGGAAACG  
GTAGCTAATACCGCATAATGTCGCAAGACCAAAGAGGGGGACCTTCGGGCCTCTT  
GCCATCGGATGTGCCAGATGGGATTAGCTAGTAGGTGGGGTAACGGCTCACCTA  
GGCGACGATCCCTAGCTGGTCTGAGAGGATGACCAGCCACACTGGAAGTGAAGAC  
ACGGTCCAGACTCCTACGGGAGGCAGCAGTGGGGAATATTGCACAATGGGCGCA  
AGCCTGATGCAGCCATGCCGCGTGTATGAAGAAGGCCTTCGGGTTGTAAAGTACT  
TTCAGCGAGGAGGAAGGCATTAAGGTTAATAACCTTGGTGATTGACGTTACTCGC  
AGAAGAAGCACCCGGCTAACTCCGTGCCAGCAGCCGCGGTAATACGGAGGGTGCA  
AGCGTTAATCGGAATTACTGGGCGTAAAGCGCACGCAGGCGGTCTGTCAAGTCG  
GATGTGAAATCCCCGGGCTCAACCTGGGAACTGCATTGAAACTGGCAGGCTAG  
AGTCTTGTAGAGGGGGGTAGAATTCCAGGTGTAGCGGTGAAATGCGTAGAGATCT  
GGAGGAATACCGGTGGCGAAGGCGGCCCCCTGGACAAAGACTGACGCTCAGGT  
GCGAAAGCGTGGGGAGCAAACAGGATTAGATACCCTGGTAGTCCACGCCGTAAA  
CGATGTCGATTTGGAGGTTGTTCCCTTGAGGAGTGGCTTCCGGAGCTAACGCGTT  
AAATCGACCGCCTGGGGAGTACGGCCGCAAGGTTAAACTCAAATGAATTGACG  
GGGGCCCCGACAAGCGGTGGAGCATGTGGTTTAATTCGATGCAACGCGAAGAAC  
CTTACCTACTCTTGACATCCAGAGAACTTTCCAGAGATGGATTGGTGCCTTCGGG  
AACTCTGAGACAGGTGCTGCATGGCTGTCGTCAGCTCGTGTGTGAAATGTTGGG  
TTAAGTCCCGCAACGAGCGCAACCCTTATCCTTTGTTGCCAGCGGTTTCGGCCGGG  
AACTCAAAGGAGACTGCCAGTGATAAACTGGAGGAAGGTGGGGATGACGTCAA  
GTCATCATGGCCCTTACGAGTAGGGCTACACACGTGCTACAATGGCATATACAAA  
GAGAAGCGACCTCGCGAGAGCAAGCGGACCTCATAAAGTATGTCGTAGTCCGGA  
TTGGAGTCTGCAACTCGACTCCATGAAGTCGGAATCGCTAGTAATCGTAGATCAG  
AATGCTACGGTGAATACGTTCCCGGGCCTTGTACACACCGCCCGTCACACCATGG  
GAGTGGGTTGCAAAAAGAAGTAGGTAGCTTAACCTTCGGGAGGGCGCT

>P214

TGCAAGTCGAACGGTAGCACAGAGAGCTTGCTCTCGGGTGACGAGTGGCGGAC  
GGGTGAGTAATGTCTGGGAAACTGCCTGATGGAGGGGGATAACTACTGGAAACG  
GTAGCTAATACCGCATAACGTCGCAAGACCAAAGAGGGGGACCTTCGGGCCTCT  
TGCCATCAGATGTGCCAGATGGGATTAGCTAGTAGGTGGGGTAACGGCTCACCT  
AGGCGACGATCCCTAGCTGGTCTGAGAGGATGACCAGCCACACTGGAAGTGAAGAC  
CACGGTCCAGACTCCTACGGGAGGCAGCAGTGGGGAATATTGCACAATGGGCGC  
AAGCCTGATGCAGCCATGCCGCGTGTATGAAGAAGGCCTTCGGGTTGTAAAGTAC  
TTTCAGCGGGGAGGAAGGTGTTGAGGTTAATAACCTTGTCAATTGACGTTACCCG  
CAGAAGAAGCACCCGGCTAACTCCGTGCCAGCAGCCGCGGTAATACGGAGGGTGC  
AAGCGTTAATCGGAATTACTGGGCGTAAAGCGCACGCAGGCGGTCTGTCAAGTC  
GGATGTGAAATCCCCGGGCTCAACCTGGGAACTGCATTGAAACTGGCAGGCTA  
GAGTCTTGTAGAGGGGGGTAGAATTCCAGGTGTAGCGGTGAAATGCGTAGAGAT  
CTGGAGGAATACCGGTGGCGAAGGCGGCCCCCTGGACAAAGACTGACGCTCAG

GTGCGAAAGCGTGGGGAGCAAACAGGATTAGATACCCTGGTAGTCCACGCCGTA  
AACGATGTCGACTTGGAGGTTGTGCCCTTGAGGCGTGGCTTCCGGAGCTAACGC  
GTTAAGTCGACCCGCCTGGGGAGTACGGCCGCAAGGTAAAACCTCAAATGAATTG  
ACGGGGGCCCGCACAAAGCGGTGGAGCATGTGGTTAATTCGATGCAACGCGAAG  
AACCTTACCTACTCTTGACATCCAGAGAACTTAGCAGAGATGCTTTGGTGCCTTC  
GGAACTCTGAGACAGGTGCTGCATGGCTGTCGTCAGCTCGTGTTGTGAAATGTT  
GGGTTAAGTCCCGCAACGAGCGCAACCCTTATCCTTTGTTGCCAGCGGTCCGGCC  
GGAACTCAAAGGAGACTGCCAGTGATAAACTGGAGGAAGGTGGGGATGACGT  
CAAGTCATCATGGCCCTTACGAGTAGGGCTACACACGTGCTACAATGGCGCATA  
AAAGAGAAGCGACCTCGCGAGAGCAAGCGGACCTCATAAAGTGCGTCTAGTCC  
GGATTGGAGTCTGCAACTCGACTCCATGAAGTCGGAATCGCTAGTAATCGTGGAT  
CAGAATGCCACGGTGAATACGTTCCCGGGCCTTGACACACCGCCCGTCACACCA  
TGGGAGTGGGTTGCAAAAGAAGTAGGTAGCTTAACCTTCGGGAGGGC
